1 **SNPC-1.3 is a sex-specific transcription factor that drives male piRNA expression**  
2 **in *C. elegans***

3

4 Charlotte P. Choi\*<sup>1</sup>, Rebecca J. Tay\*<sup>1</sup>, Margaret R. Starostik<sup>1</sup>, Suhua Feng<sup>2,3</sup>, James J.  
5 Moresco<sup>4</sup>, Brooke E. Montgomery<sup>5</sup>, Emily Xu<sup>1</sup>, Maya A. Hammonds<sup>1</sup>, Michael C.  
6 Schatz<sup>1,6</sup>, Taiowa A. Montgomery<sup>5</sup>, John R. Yates III<sup>7</sup>, Steven E. Jacobsen<sup>2,8</sup>, John K.  
7 Kim<sup>1,9</sup>

8

9 \*These authors contributed equally to this study.

10 <sup>1</sup>Department of Biology, Johns Hopkins University, Baltimore, MD 21218, USA

11 <sup>2</sup>Department of Molecular, Cell and Developmental Biology, University of California at Los  
12 Angeles, Los Angeles, CA 90095, USA

13 <sup>3</sup>Eli and Edythe Broad Center of Regenerative Medicine and Stem Cell Research,  
14 University of California at Los Angeles, Los Angeles, CA 90095, USA

15 <sup>4</sup>Center for the Genetics of Host Defense, University of Texas Southwestern Medical  
16 Center, Dallas, TX 75390, USA

17 <sup>5</sup>Department of Biology, Colorado State University, Fort Collins, CO 80523, USA

18 <sup>6</sup>Department of Computer Science, Johns Hopkins University, Baltimore, 21218, USA

19 <sup>7</sup>Department of Molecular Medicine, The Scripps Research Institute, La Jolla, CA 92037,  
20 USA

21 <sup>8</sup>Howard Hughes Medical Institute, University of California at Los Angeles, Los Angeles,  
22 CA 90095, USA

23

24 <sup>9</sup>Lead Contact

25 Correspondence: [jnkim@jhu.edu](mailto:jnkim@jhu.edu)

26

27 **ABSTRACT**

28 Piwi-interacting RNAs (piRNAs) play essential roles in silencing repetitive elements to  
29 promote fertility in metazoans. Studies in worms, flies, and mammals reveal that piRNAs  
30 are expressed in a sex-specific manner. However, the mechanisms underlying this sex-  
31 specific regulation are unknown. Here we identify SNPC-1.3, a variant of a conserved  
32 subunit of the snRNA activating protein complex, as a male-specific piRNA transcription  
33 factor in *C. elegans*. Binding of SNPC-1.3 at male piRNA loci drives spermatogenic piRNA  
34 transcription and requires the core piRNA transcription factor SNPC-4. Loss of *snpc-1.3*  
35 leads to depletion of male piRNAs and defects in male-dependent fertility. Furthermore,  
36 TRA-1, a master regulator of sex determination, binds to the *snpc-1.3* promoter and  
37 represses its expression during oogenesis. Loss of TRA-1 targeting causes ectopic  
38 expression of *snpc-1.3* and male piRNAs during oogenesis. Thus, sexual dimorphic  
39 regulation of *snpc-1.3* coordinates male and female piRNA expression during germline  
40 development.

41

42

## 43 INTRODUCTION

44 Piwi-interacting RNAs (piRNAs), a distinct class of small noncoding RNAs, function to  
45 preserve germline integrity (Batista et al., 2008; Carmell et al., 2007; Cox et al., 1998;  
46 Deng and Lin, 2002; Kuramochi-Miyagawa et al., 2008; Lin and Spradling, 1997; Wang  
47 and Reinke, 2008). In *Drosophila*, mutation of any of the three Piwi genes (*piwi*, *aub*,  
48 *ago3*) results in rampant activation of transposons in the germline and severe defects in  
49 fertility (Brennecke et al., 2007; Harris and Macdonald, 2001; Lin and Spradling, 1997;  
50 Vagin et al., 2006). In *M. musculus*, mutation of the Piwi protein *Miwi* leads to the  
51 misregulation of genes involved in germ cell development, defective gametogenesis, and  
52 sterility (Deng and Lin, 2002; Zhang et al., 2015b). *C. elegans* piRNAs can be inherited  
53 across multiple generations and trigger the transgenerational silencing of coding genes.  
54 Disruption of this inheritance results in eventual germline collapse and sterility, known as  
55 the germline mortal phenotype (Ashe et al., 2012; Buckley et al., 2012; Shirayama et al.,  
56 2012). Taken together, piRNAs are essential to preserve germline integrity and protect  
57 the reproductive capacity in metazoans.

58  
59 Loss of the piRNA pathway can have distinct consequences between sexes and across  
60 developmental stages. Many species show sex-specific expression of piRNAs (Armisen  
61 et al., 2009; Billi et al., 2013; Williams et al., 2015; Yang et al., 2013; Zhou et al., 2010).  
62 Demonstrated by hybrid dysgenesis, the identity of female, but not male, piRNAs in flies  
63 is important for fertility (Brennecke et al., 2008). In contrast, the piRNA pathway in  
64 mammals appears to be dispensable for female fertility (Carmell et al., 2007; Murchison  
65 et al., 2007), but distinct subsets of piRNAs are required for specific stages of  
66 spermatogenesis (Aravin et al., 2003; Aravin et al., 2006; Carmell et al., 2007; Di Giacomo  
67 et al., 2013; Gainetdinov et al., 2018; Girard et al., 2006; Grivna et al., 2006; Kuramochi-  
68 Miyagawa et al., 2008; Li et al., 2013). In worms, most piRNAs are uniquely enriched in  
69 either the male or female germline (Billi et al., 2013; Kato et al., 2009). Nevertheless, in  
70 all of these contexts, how the specific expression of different piRNA subclasses is  
71 achieved is poorly understood.

72  
73 piRNA biogenesis is strikingly diverse across organisms and tissue types. In the  
74 *Drosophila* germline, piRNA clusters are found within pericentromeric or telomeric

75 heterochromatin enriched for H3K9me3 histone modifications. The HP1 homolog Rhino  
76 binds to H3K9me3 within most of these piRNA clusters and recruits Moonshiner, a  
77 paralog of the basal transcription factor TFIIA, which, in turn, recruits RNA polymerase II  
78 (Pol II) to enable transcription within heterochromatin (Andersen et al., 2017; Chen et al.,  
79 2016; Klattenhoff et al., 2009; Mohn 2014; et al., Pane et al., 2011). Two waves of piRNA  
80 expression occur in mouse testes: pre-pachytene piRNAs are expressed in early  
81 spermatogenesis and silence transposons, whereas pachytene piRNAs are expressed in  
82 the later stages of meiosis and have unknown functions. While the mechanisms of pre-  
83 pachytene piRNA transcription remain elusive, pachytene piRNAs require the  
84 transcription factor A-MYB, along with RNA Pol II (Li et al., 2013).

85  
86 In *C. elegans*, SNPC-4 is essential for the expression of piRNAs in the germline (Kasper  
87 et al., 2014). SNPC-4 is the single *C. elegans* ortholog of mammalian SNAPC4, the  
88 largest DNA binding subunit of the small nuclear RNA (snRNA) activating protein complex  
89 (SNAPc). A complex of SNAPC4, SNAPC1, and SNAPC3 binds to the proximal sequence  
90 element (PSE) of snRNAs to promote their transcription (Henry et al., 1995; Jawdekar  
91 and Henry, 2008; Ma and Hernandez, 2002; Su et al., 1997; Wong et al., 1998; Yoon et  
92 al., 1995). SNPC-4 occupies transcription start sites of other classes of noncoding RNAs  
93 across various *C. elegans* tissue types and developmental stages (Kasper et al., 2014;  
94 Weng et al., 2018). Furthermore, piRNA biogenesis factors PRDE-1, TOFU-4, and TOFU-  
95 5 are expressed in germ cell nuclei and interact with SNPC-4 at clusters of piRNA loci  
96 (Goh et al., 2014; Kasper et al., 2014; Weick et al., 2014; Weng et al., 2018). These data  
97 suggest that SNPC-4 has been co-opted by germline-specific factors to transcribe  
98 piRNAs.

99  
100 The vast majority of the ~15,000 piRNAs in *C. elegans* are encoded within two large  
101 megabase genomic clusters on chromosome IV (Das et al., 2008; Ruby et al., 2006).  
102 Each piRNA locus encodes a discrete transcriptional unit that is individually transcribed  
103 as a short precursor by Pol II (Gu et al., 2012; Cecere et al., 2012; Billi et al., 2013).  
104 Processing of precursors yields mature piRNAs that are typically 21 nucleotides (nt) in  
105 length and strongly enriched for a 5' uracil (referred to as 21U-RNAs). Transcription of  
106 these piRNAs requires a conserved 8 nt core motif (NNGTTTCA) within their promoters

107 (Billi et al., 2013; Cecere et al., 2012; Ruby et al., 2006). piRNAs enriched during  
108 spermatogenesis are associated with a cytosine at the 5' most position of the core motif  
109 (CNGTTTCA); mutation of cytosine to adenine at this position results in ectopic  
110 expression of normally male-enriched piRNAs during oogenesis. In contrast, genomic loci  
111 expressing piRNAs enriched in the female germline show no discernable nucleotide bias  
112 at the 5' position. While differences in *cis*-regulatory sequences contribute to the sexually  
113 dimorphic nature of piRNA expression, sex-specific piRNA transcription factors that drive  
114 distinct subsets of piRNAs in the male and female germlines remain to be identified.

115  
116 Here, we discovered that SNPC-1.3, an ortholog of human SNAPC1, is required  
117 specifically for male piRNA expression. Furthermore, TRA-1, a master regulator of sex-  
118 determination, transcriptionally represses *snp-1.3* during oogenesis to restrict its  
119 expression to the male germline. Taken together, our study reports the first example of a  
120 sex-specific piRNA transcription factor that drives the expression of male-specific  
121 piRNAs.

122  
123

## 124 RESULTS

125

### 126 **SNPC-4 is a component of the core piRNA transcription complex that drives all** 127 **piRNA expression.**

128 SNPC-4-specific foci are present in both male and female germ cell nuclei (Kasper et al.,  
129 2014), but the role of SNPC-4 in the male germline is not well understood. We  
130 hypothesized that SNPC-4 is required for piRNA biogenesis in both the male and female  
131 germlines. To test this, we conditionally depleted the SNPC-4 protein using the auxin-  
132 inducible degradation system (Zhang et al., 2015a) (Figure S1A). We added an auxin-  
133 inducible degron (AID) to the C-terminus of SNPC-4 using CRISPR/Cas9 genome  
134 engineering, and crossed this strain into worms expressing TIR1 under the germline  
135 promoter, *sun-1*. TIR1 is a plant-specific F-box protein that mediates the rapid  
136 degradation of *C. elegans* proteins tagged with an AID in the presence of the  
137 phytohormone auxin. Thus, addition of auxin to the *snp-4::aid; P<sub>sun-1</sub>::TIR1* strain is

138 expected to degrade SNPC-4::AID, whereas strains with *snpc-4::aid* alone serve as a  
139 negative control; under these conditions, we examined a panel of spermatogenesis- and  
140 oogenesis-enriched piRNAs (Billi et al., 2013). We found that worms depleted of SNPC-  
141 4 showed decreased expression of both spermatogenesis- and oogenesis-enriched  
142 piRNAs during spermatogenesis and oogenesis, respectively (Figure 1A), indicating that  
143 SNPC-4 is a core piRNA transcription factor required for all piRNA expression.

144

145 Given that SNPC-4 activates transcription of piRNAs in both sexes, we hypothesized that  
146 sex-specific cofactors might associate with SNPC-4 to regulate sexually dimorphic piRNA  
147 expression. To test this hypothesis, we leveraged genetic backgrounds that masculinize  
148 or feminize the germline. Specifically, we used *him-8(-)* mutants, which have a higher  
149 incidence of males (~30% males compared to <0.5% spontaneous males in the wild-type  
150 hermaphrodite population) (Hodgkin et al., 1979), and *fem-1(-)* mutants, which are  
151 completely feminized when grown at 25°C (Doniach and Hodgkin, 1984). We introduced  
152 a C-terminal 3xFlag tag sequence at the endogenous *snpc-4* locus using CRISPR/Cas9  
153 genome editing (Paix et al., 2015) and performed immunoprecipitation of SNPC-4::3xFlag  
154 followed by mass spectrometry. We identified PRDE-1 and TOFU-5 as co-purifying with  
155 SNPC-4::3xFlag in both *him-8(-)* and *fem-1(-)* mutants, suggesting that these known  
156 piRNA biogenesis factors exist as a complex in both male and female germlines (Figures  
157 1B–C, and S1B). While a single worm ortholog, SNPC-4, exists for human SNAPC4, the  
158 *C. elegans* genome encodes 4 homologs of human SNAPC1 (worm SNPC-1.1, -1.2, -  
159 1.3, and -1.5) and 4 homologs of human SNAPC3 (worm SNPC-3.1, -3.2, -3.3, and -3.4)  
160 (Figure 1B) (Li et al., 2004). From our mass spectrometry analysis, 6 out of the 8 *C.*  
161 *elegans* homologs of SNAPC1 and SNAPC3 co-purified with SNPC-4::3xFlag from both  
162 *him-8(-)* and *fem-1(-)* genetic backgrounds (Figures 1B–C). These results revealed that  
163 SNPC-4 interacts with both snRNA and piRNA transcription machinery.

164

### 165 **SNPC-1.3 interacts with the core piRNA biogenesis factor SNPC-4 during** 166 **spermatogenesis.**

167 We also identified proteins that co-purified with SNPC-4::3xFlag from *him-8(-)*, but not  
168 *fem-1(-)* mutants. We were particularly interested in SNPC-1.3 because of its homology

169 to the mammalian SNAPC1 subunit of the snRNA transcription complex. To characterize  
170 SNPC-1.3, we used CRISPR/Cas9 genome editing to insert a 3xFlag tag sequence at the  
171 C-terminus of the endogenous *snpc-1.3* locus. Addition of 3xFlag at the C-terminus of  
172 either the a or b isoform had no effect on fertility or levels of spermatogenesis- and  
173 oogenesis-enriched piRNAs (Figures S1C–G). Henceforth, SNPC-1.3 refers specifically  
174 to the SNPC-1.3a isoform. SNPC-1.3::3xFlag was highly expressed during  
175 spermatogenesis and showed markedly reduced expression during oogenesis (Figure  
176 1D). To determine whether SNPC-1.3 expression is restricted to the germline, we  
177 examined SNPC-1.3::3xFlag expression in the *glp-4(bn2)* mutant, which fails to develop  
178 fully-expanded germlines at 25°C (Beanan and Strome, 1992). SNPC-1.3::3xFlag  
179 expression during early spermatogenesis was greatly reduced in *glp-4(bn2)* compared to  
180 wildtype, suggesting that SNPC-1.3 is primarily expressed in the germline during  
181 spermatogenesis (Figure 1D).

182  
183 To confirm that SNPC-1.3 interacts with SNPC-4, we used CRISPR/Cas9 genome editing  
184 to generate an endogenously tagged *snpc-1.3::ollas* strain. We then crossed *snpc-*  
185 *1.3::ollas* into the *snpc-4::3xflag* strain and performed co-immunoprecipitation  
186 experiments with anti-Flag antibodies. In agreement with the mass spectrometry data,  
187 SNPC-4::3xFlag and SNPC-1.3:Ollas interacted robustly during spermatogenesis. The  
188 interaction was detectable at a much lower level during oogenesis (Figure 1E), likely due  
189 to the significant decrease in SNPC-1.3 expression during this time (Figure 1D). The  
190 reciprocal co-immunoprecipitation of SNPC-1.3::3xFlag followed by western blotting for  
191 SNPC-4::Ollas confirmed this biochemical interaction (Figure S1H). Taken together, our  
192 data indicate that SNPC-1.3 forms a complex with the previously characterized piRNA  
193 biogenesis factor SNPC-4 in the male germline.

194

### 195 **SNPC-1.3 is required for transcription of male piRNAs.**

196 Given the prominent interaction between SNPC-1.3 and SNPC-4 in the male germline  
197 (Figure 1E), we hypothesized that SNPC-1.3 might be required for piRNA expression  
198 during spermatogenesis. To test this hypothesis, we generated a *snpc-1.3* null allele by  
199 introducing mutations that result in a premature stop codon (Paix et al., 2015). We

200 examined spermatogenesis in hermaphrodites and *him-8(-)* males, and examined  
201 oogenesis in adult hermaphrodites and *fem-1(-)* females. As a control, we analyzed the  
202 loss-of-function mutant of the *C. elegans* Piwi protein, *prg-1(-)*, which almost completely  
203 lacked spermatogenesis- and oogenesis-enriched piRNAs (Figure 2A), as expected. We  
204 found that the levels of spermatogenesis-enriched piRNAs were dramatically reduced in  
205 *snpc-1.3(-)* hermaphrodites during spermatogenesis and in *him-8(-); snpc-1.3(-)* males,  
206 whereas oogenesis-enriched piRNAs were largely unaltered in *snpc-1.3(-)* adult  
207 hermaphrodites and in *fem-1(-); snpc-1.3(-)* females (Figures 2A–B). Moreover,  
208 oogenesis-enriched piRNAs were upregulated at least 2-fold in *snpc-1.3(-)* mutants  
209 undergoing spermatogenesis and in *him-8(-); snpc-1.3(-)* males. These findings suggest  
210 that, in addition to activating male piRNAs, SNPC-1.3 suppresses the expression of  
211 female piRNAs in the male germline, possibly by preferentially recruiting core factors such  
212 as SNPC-4 to male piRNA loci.

213  
214 To extend these findings, we identified piRNAs enriched during spermatogenesis and  
215 oogenesis by small RNA-seq in wild-type worms (Figures S2A and S3A). Using a 1.2-fold  
216 threshold and false discovery rate (FDR) of  $\leq 0.05$ , a total of 6,368 out of 14,714 piRNAs  
217 on chromosome IV were differentially expressed (Figures 2C, S2, S3B, and Table S1).  
218 Among these, 4,060 piRNAs were upregulated during spermatogenesis (hereafter  
219 referred to as male piRNAs) and 2,308 piRNAs were upregulated during oogenesis, which  
220 we define as female piRNAs. We compared this dataset with our previous study that  
221 identified spermatogenesis- and oogenesis-enriched piRNAs (Billi et al., 2013). Most  
222 male piRNAs identified here were also found in our previous study (82%; 3,316/4,060)  
223 (Figure 2C). Next, we investigated how loss of *snpc-1.3* affects global piRNA expression  
224 by performing small RNA-seq in wildtype versus *snpc-1.3(-)* mutants during  
225 spermatogenesis. We identified 3,601 piRNAs that were downregulated in a *snpc-1.3(-)*  
226 mutant compared to wildtype (Figures 2D, S3C, and Table S2). Of these, 3,002  
227 overlapped with spermatogenesis-enriched piRNAs identified in our previous study (Billi  
228 et al., 2013) (Figure 2D). 85% (3,452/4,060) of male piRNAs were also depleted in *snpc-*  
229 *1.3(-)* mutants during spermatogenesis, suggesting that male piRNAs are regulated by



230 SNPC-1.3 (Figures 2E and S3D). In addition, 73% (1,687/2,308) of female piRNAs were  
231 ectopically upregulated in *snpc-1.3(-)* mutants during spermatogenesis (Figure 2F).

232  
233 We next analyzed the genomic loci of male piRNAs and *snpc-1.3*-dependent piRNAs. As  
234 expected, the intersection of these two piRNA subsets displayed strong enrichment for  
235 the 8 nt core motif and the 5'-most position of this core motif was enriched for cytosine  
236 (CNGTTTCA) (Figures 2E and S3D). In contrast, the core motif found upstream of  
237 oogenesis-enriched piRNAs upregulated upon loss of *snpc-1.3* displayed a much weaker  
238 bias for the 5' cytosine (Figure 2F). These observations validate our previous findings that  
239 male and female core motifs are distinct (Billi et al., 2013). Taken together, these data  
240 indicate that SNPC-1.3 is required for male piRNA expression.

241

#### 242 **SNPC-1.3 binds male piRNA loci in a SNPC-4-dependent manner.**

243 Given that SNPC-1.3 interacts with SNPC-4 and is required for expression of male  
244 piRNAs, we hypothesized that SNPC-1.3 might bind male piRNA loci in association with  
245 SNPC-4. To test this, we performed ChIP-qPCR to investigate SNPC-1.3 occupancy at  
246 regions of high piRNA density within the two large piRNA clusters on chromosome IV; an  
247 intergenic region lacking piRNAs served as a control. To determine whether SNPC-1.3  
248 binding was dependent on SNPC-4, we again used the auxin-inducible degradation  
249 system to deplete SNPC-4 in the *snpc-1.3::3xflag* strain for 4 hours prior to our  
250 spermatogenesis time point. In the presence of SNPC-4 expression, SNPC-1.3 was  
251 enriched at both piRNA clusters, albeit to a lesser degree at the small cluster, and this  
252 enrichment was lost upon SNPC-4 depletion (Figures 3A and S4A). These data indicate  
253 that SNPC-1.3 binds piRNA loci during spermatogenesis in a SNPC-4-dependent manner  
254 *in vivo*.

255

256 To examine the genome-wide binding profile of SNPC-1.3 and its dependency on SNPC-  
257 4, we performed ChIP-seq of wildtype, *snpc-1.3::3xflag*, and *snpc-1.3::3xflag; snpc-4::aid;*  
258 *P<sub>sun-1</sub>::TIR1* worms during spermatogenesis (Figures S4B–C). Consistent with our ChIP-  
259 qPCR results, we found that SNPC-1.3 binds piRNA clusters in a SNPC-4-dependent  
260 manner (Figures 3B and S4D). By quantifying the SNPC-1.3 signal over consecutive,  
261 non-overlapping 1 kb bins across the entire genome, we identified 691 1 kb regions within

262 the chromosome IV piRNA clusters that were enriched for SNPC-1.3 in *snpc-1.3::3xflag*  
263 worms (wild-type) compared to the no-tag control worms (Figures 3C and S4E). Relative  
264 to *snpc-1.3::3xflag* (wild-type), worms depleted of SNPC-4 showed loss of SNPC-1.3 in  
265 749 1 kb regions on chromosome IV piRNA clusters (Figure 3D). Furthermore, SNPC-1.3  
266 enrichment ( $p < 2.2 \times 10^{-16}$ ) and depletion ( $p < 2.2 \times 10^{-16}$ ) were specific to the piRNA  
267 clusters on chromosome IV, and more than half (393/691) of the SNPC-1.3-enriched  
268 regions in *snpc-1.3::3xflag* worms were depleted upon degradation of SNPC-4 (Figures  
269 3C–D, S4E–F).

270  
271 To determine whether SNPC-1.3 preferentially binds male piRNA loci, we characterized  
272 the SNPC-1.3 signal around individual 5' nucleotides of mature piRNAs. Again, we  
273 classified piRNAs as enriched in male or female germlines based on our small RNA-seq  
274 analysis in wild-type worms during spermatogenesis and oogenesis (Figure 2C). We  
275 found that SNPC-1.3 binding at male piRNA loci was most enriched just upstream of the  
276 piRNA 5' nucleotide, which overlaps the conserved core motif (Figures 3E and S4G). This  
277 binding profile was very distinct for 1 kb bins that contained only male piRNAs (Figures  
278 3F and S4H). Upon depletion of SNPC-4, this peak in male piRNAs was lost (Figures 3E  
279 and S4G). Although the binding profiles for individual female piRNAs exhibited more  
280 variability, there was little evidence for SNPC-1.3 binding and dependency on SNPC-4 at  
281 female loci (Figures 3E and S4G). Compared to the binding profile in male piRNA loci,  
282 SNPC-1.3 binding was observed to a lesser extent in piRNAs not enriched in the male  
283 and female germline (Figures 3E and S4G). Taken together, these observations indicate  
284 that SNPC-1.3 requires the core piRNA factor SNPC-4 to bind predominantly at male  
285 piRNA promoters.

286

### 287 **TRA-1 represses *snpc-1.3* and male piRNAs expression during oogenesis.**

288 As male piRNA expression and SNPC-1.3 protein expression are largely restricted to the  
289 male germline, we asked how SNPC-1.3 expression is regulated across development. *C.*  
290 *elegans* hermaphrodites produce sperm during the L4 stage and transition to producing  
291 oocytes as adults. To understand the mRNA expression profile of *snpc-1.3* relative to  
292 *snpc-4* and other developmentally regulated genes, we performed qRT-PCR across

293 hermaphrodite development. *snp-4* expression peaked during young adult and adult  
294 stages when oogenesis occurs (Figures 4A and S1E). These data suggest that low levels  
295 of SNPC-4 are sufficient for activating male piRNA biogenesis during spermatogenesis  
296 (Figure 1A). Consistent with SNPC-1.3 protein expression (Figure 1D), we observed  
297 specific *snp-1.3* mRNA enrichment from L3 to early L4 stages, during spermatogenesis  
298 (Figure 4A). Given that *snp-1.3* expression across development is regulated at the  
299 mRNA level, we examined the sequences upstream of the *snp-1.3* coding region to  
300 identify potential *cis*-regulatory motifs. Less than 200 bp upstream of the *snp-1.3* start  
301 codon, we identified three consensus binding sites for TRA-1 (Figure 4B), a transcription  
302 factor that controls the transition from spermatogenesis to oogenesis (Berkseth et al.,  
303 2013; Clarke and Berg, 1998; Zarkower and Hodgkin, 1993).

304  
305 In the germline, TRA-1, a Gli family zinc-finger transcription factor, controls the sperm-to-  
306 oocyte decision by repressing both *fog-1* and *fog-3*, which are required for controlling  
307 sexual cell fate (Berkseth et al., 2013; Chen and Ellis, 2000; Lamont and Kimble, 2007;  
308 Zarkower and Hodgkin, 1993). Loss-of-function *tra-1* hermaphrodites exhibit  
309 masculinization of the female germline and develop phenotypically male-like traits  
310 (Hodgkin, 1987). We used RNAi to knock down *tra-1* and observed significant ectopic  
311 upregulation of *snp-1.3* mRNA during oogenesis (Figure 4C). However, this upregulation  
312 of *snp-1.3* expression could be an indirect effect of masculinization of the germline.  
313 Therefore, to test whether TRA-1 directly regulates *snp-1.3*, we generated strains  
314 harboring mutations at the three TRA-1 binding sites (*tbs*) in the endogenous *snp-1.3*  
315 promoter. Specifically, we mutated one (*1xtbs*), two (*2xtbs*), or all three (*3xtbs*) consensus  
316 TRA-1 binding motifs (Figure 4B). Disruption of the TRA-1 binding sites led to reduced  
317 TRA-1::3xFlag binding upstream of *snp-1.3* as revealed by ChIP-seq, with the *3xtbs*  
318 mutant showing the greatest reduction of binding (Figures 4B and S5D). In addition, *snp-*  
319 *1.3* mRNA levels were highly upregulated when multiple TRA-1 binding sites were  
320 mutagenized (Figure 4C), consistent with TRA-1 directly repressing *snp-1.3* transcription  
321 during oogenesis. To confirm that SNPC-1.3 protein expression was also elevated in  
322 TRA-1 binding site mutants, we used CRISPR/Cas9 engineering to add a C-terminal  
323 3xFlag tag at the *snp-1.3* locus in *snp-1.3(2xtbs)* mutants. Indeed, SNPC-1.3::3xFlag

324 showed increased expression in the *snpc-1.3::3xFlag(2xtbs)* mutant during  
325 spermatogenesis and especially oogenesis (Figure 4C). Taken together, these findings  
326 show that TRA-1 binds to the *snpc-1.3* promoter to repress its transcription during  
327 oogenesis.

328  
329 Given that *snpc-1.3* is robustly de-repressed during oogenesis in TRA-1 binding site  
330 mutants, we hypothesized that male piRNAs would also be ectopically upregulated during  
331 oogenesis. To test this, we performed small RNA-seq and compared piRNA levels in  
332 wildtype and *snpc-1.3(2xtbs)* worms during oogenesis (Table S3, Figure S5B–C, S5E).  
333 Using a FDR of  $\leq 0.05$ , we saw significant upregulation of 1,370 piRNAs in *snpc-*  
334 *1.3(2xtbs)* mutants when compared to wildtype (Figure 4D). The majority of these  
335 upregulated piRNAs overlap with the male piRNAs that we identified in wildtype worms  
336 (Figure 4D). We also confirmed this result by Taqman qPCR analysis, which showed that  
337 male piRNAs were significantly upregulated in *snpc-1.3(2xtbs)* and *snpc-1.3(3xtbs)*  
338 mutants compared to wildtype during oogenesis (Figure 4E). Taken together, these data  
339 suggest that TRA-1 directly binds to *tbs* sites in the *snpc-1.3* promoter to repress its  
340 transcription and consequently, male piRNA expression during oogenesis.

341  
342 Our data showed that female piRNAs are upregulated during spermatogenesis upon loss  
343 of *snpc-1.3* (Figure 2D). Consistent with this result, we found that female piRNAs show  
344 reduced expression during oogenesis upon upregulation of SNPC-1.3 in *snpc-1.3(2xtbs)*  
345 and *snpc-1.3(3xtbs)* mutants compared to wildtype (Figure 4E). We posit that SNPC-1.3  
346 plays a direct role in activating male piRNA transcription, while indirectly limiting female  
347 piRNA transcription by sequestering core piRNA transcription factors to male piRNA loci.

348

### 349 **SNPC-1.3 is critical for male fertility.**

350 Given the global depletion of male piRNAs in *snpc-1.3(-)* mutants and the progressive  
351 fertility defects seen in *prg-1(-)* mutants (Batista et al., 2008; Wang and Reinke, 2008),  
352 we hypothesized that *snpc-1.3(-)* worms might also show fertility defects. Indeed, we  
353 found that *snpc-1.3(-)* hermaphrodites exhibited significantly reduced fertility compared  
354 to wildtype when grown at 25°C (Figure 5A). To address whether this decreased fertility  
355 was due to defects during spermatogenesis or oogenesis, we compared brood sizes from

356 crosses of *fem-1(-)* females and *him-8(-)* males with or without *snp-1.3*. Compared to  
357 *him-8(-)* males, we found that *him-8(-); snp-1.3(-)* males generated significantly smaller  
358 brood sizes when crossed with *fem-1(-)* females; in contrast, *fem-1(-); snp-1.3(-)* and  
359 *fem-1(-)* females generated similar brood sizes when crossed with *him-8(-)* males (Figure  
360 5B). As an orthogonal test, we crossed hermaphrodites with transgenic males that  
361 express the COL-19::GFP marker in the cuticle to facilitate counting of cross progeny  
362 (Figure S6A). All *col-19::gfp; snp-1.3(-)* males produced fewer GFP+ progeny than wild-  
363 type *col-19::gfp* males, whereas wildtype or *snp-1.3(-)* hermaphrodites generated similar  
364 numbers of GFP+ progeny when crossed with wild-type *col-19::gfp* males (Figure S6A).  
365 These results suggest that the reduced fertility of *snp-1.3(-)* mutants likely reflect defects  
366 during spermatogenesis.

367  
368 To investigate the cause of *snp-1.3*-dependent loss of male fertility, we examined  
369 spermiogenesis and sperm morphology in *snp-1.3(-)* males in greater detail. After  
370 meiotic differentiation in the male germline, male spermatids are induced by ejaculation  
371 and undergo spermiogenesis, a process that converts immature spermatids to motile  
372 sperm with a functioning pseudopod. Spermiogenesis can be induced *in vitro* by isolating  
373 spermatids from the spermatheca and treating them with pronase (Shakes and Ward,  
374 1989). Males lacking *prg-1* still generate differentiated spermatids, but rarely produce  
375 normal pseudopodia upon activation (Figures 5C and 5D) (Wang and Reinke, 2008).  
376 Similar to *prg-1(-)* mutants, *snp-1.3(-)* spermatids were rarely able to form normal  
377 pseudopodia. In contrast, *snp-1.3(3xtbs)* sperm formed normal pseudopodia at a  
378 frequency similar to wildtype (Figures 5C–D). In addition, many of the *snp-1.3(-)*  
379 spermatids resembled sperm undergoing intermediate stages of spermiogenesis.  
380 Spermiogenesis *in vivo* starts off with spherical spermatids that enter into an intermediate  
381 stage characterized by the growth of spiky protrusions. This stage is then followed by  
382 fusion of the spiky protrusions into a motile pseudopod (Figure 5E). To understand the  
383 dynamics of *snp-1.3(-)* sperm progression through spermiogenesis, we treated  
384 spermatids with pronase and observed each activated spermatid over time. Wild-type  
385 spermatids spent an average of 6.2 min  $\pm$  4.5 min in the intermediate state before  
386 polarization and pseudopod development. In contrast, *snp-1.3(-)* spermatids occupied

387 the intermediate state for a significantly shorter period of time (2.9 min  $\pm$  3.7 min,  $p < 0.05$ ;  
388 Student's t test) before forming pseudopods. By tracking each individual spermatid across  
389 spermiogenesis, we found most *snp-1.3(-)* spermatids were unable to sustain motility.  
390 While wild-type spermatids exhibited motility for an average of 24 min  $\pm$  10.35 min, *snp-*  
391 *1.3(-)* spermatids showed motility for significantly shorter period of time (7.3 min  $\pm$  5.7  
392 min,  $p < 0.05$ ; Student's t test) before becoming immotile (Figure 5E, bottom). These  
393 results indicate that *snp-1.3(-)* males have defective spermatogenesis processes and  
394 exhibit similar fertility defects as *prg-1(-)* mutants.

395

396

## 397 **DISCUSSION**

398 Based on our data, we propose that *C. elegans* SNPC-1.3, a human SNAPC1 ortholog,  
399 is a male piRNA transcription factor. SNPC-1.3 preferentially binds to the promoters of  
400 male piRNAs (Figure 3) and is critical for their expression (Figure 2). SNPC-1.3  
401 expression, reflecting the developmental profile of male piRNAs (Figure S5A), is highest  
402 during spermatogenesis. We demonstrate that the *snp-1.3* locus itself is regulated by  
403 the sex determination regulator, TRA-1 (Figure 4). During spermatogenesis, *tra-1*  
404 expression is low, and *snp-1.3* and other male-promoting genes are licensed for  
405 expression. In contrast, *tra-1* expression is upregulated during oogenesis and TRA-1  
406 binds the *snp-1.3* promoter to repress its transcription, promoting the expression of  
407 female over male piRNAs (Figure 6). We propose that SNPC-1.3, via its interaction with  
408 SNPC-4, can switch the specificity of the core piRNA complex from binding at female to  
409 male piRNA loci.

410

### 411 **How is the expression of male and female piRNAs coordinated?**

412 Given its role as a putative male piRNA transcription factor, we expected that deletion of  
413 *snp-1.3* would result in loss of male piRNAs but with no consequences to the expression  
414 of female piRNAs. However, loss of *snp-1.3* also results in increased female piRNA  
415 expression during spermatogenesis (Figure 2), whereas ectopic overexpression of *snp-*  
416 *1.3* during oogenesis leads to decreased female piRNA levels (Figure 4). Taken together,  
417 our findings suggest that male and female piRNA transcription are not completely

418 separable from each other and that the balance in expression of the two piRNA  
419 subclasses may be dictated by the allocation of shared core transcription factors such as  
420 SNPC-4.

421  
422 Similar to multiple gene classes activated by general transcription factors (Levine et al.,  
423 2014), we speculate that male and female piRNA promoters compete for access to a  
424 limited pool of the core biogenesis complex, which includes SNPC-4, PRDE-1, TOFU-4,  
425 and TOFU-5 (Figure 1). Therefore, we propose a model in which the expression and  
426 binding of SNPC-1.3 to core piRNA factors serves to “sequester” the core complex away  
427 from female promoters. Mechanistically, we posit that the core piRNA transcription  
428 complex is specified to female promoters, and that only upon association with SNPC-1.3  
429 is the core machinery directed to male piRNA promoters. We predict that when SNPC-  
430 1.3 is absent, more SNPC-4 and other previously identified cofactors are available to  
431 transcribe female piRNAs. Conversely, overexpression of SNPC-1.3 leads to the  
432 disproportionate recruitment of the core machinery to male promoters, leading to the  
433 indirect downregulation of female piRNAs. By controlling male piRNA expression, SNPC-  
434 1.3 is crucial for maintaining the balance between male and female piRNA levels across  
435 development.

436  
437 While the default specification of the core complex to female promoters presents perhaps  
438 the most parsimonious explanation underlying male and female piRNA expression, we  
439 cannot exclude the possibility that an additional female-specific *trans*-acting factor may  
440 direct the core piRNA complex to female promoters. If true, we speculate that the  
441 developmental expression of such a factor (low during spermatogenesis and high during  
442 oogenesis), coupled with the developmental expression of SNPC-1.3, would coordinate  
443 the differential expression of male and female piRNAs. During spermatogenesis, SNPC-  
444 1.3 is more highly expressed such that the core machinery would primarily be directed to  
445 male promoters. In contrast, during oogenesis, SNPC-1.3 expression is low, concomitant  
446 with elevated expression of a female factor to license transcription of female piRNAs. This  
447 model, where both factors are present during both spermatogenesis and oogenesis but  
448 in different ratios, would also be consistent with our piRNA expression analysis in *snpc*-  
449 1.3 loss-of-function and overexpression mutants.

450

451 **The piRNA pathway co-opts snRNA biogenesis machinery.**

452 Our work adds to a growing body of evidence that snRNA machinery has been hijacked  
453 at multiple stages in *C. elegans* piRNA biogenesis, including transcription (Kasper et al.,  
454 2014; Weng et al., 2018) and termination (Beltran et al., 2019). Investigating potential  
455 parallels between snRNA and piRNA biogenesis may provide useful clues into the role of  
456 SNPC-1.3 in the piRNA complex.

457

458 The minimal snRNA SNAPc complex consists of a 1:1:1 heterotrimer of the subunits  
459 SNAPC4, SNAPC1, and SNAPC3 in humans and SNAP190, SNAP43, and SNAP50 in  
460 flies (Henry et al., 1998; Hung and Stumph, 2010; Li et al., 2004; Ma and Hernandez,  
461 2002; Mittal et al., 1999) (Figure 1B). *In vitro* studies have shown that the trimer must  
462 assemble before the complex is able to bind DNA. Similarly, our data show SNPC-1.3  
463 requires SNPC-4 to bind at the piRNA clusters (Figure 3). We speculate the piRNA  
464 complex is assembled in a similar fashion to the snRNA complex. Based on this model,  
465 we expect that SNPC-4 binding at male piRNA loci is abolished in a *snpc-1.3* mutant.  
466 However, conclusive evidence that SNPC-4 binding at male piRNA promoters requires  
467 SNPC-1.3 is still lacking. Due to the highly clustered nature of *C. elegans* piRNAs, we  
468 have been unable to discriminate detectable differences in SNPC-4 binding between male  
469 and female piRNAs in *snpc-1.3(-)* mutants, as assayed by traditional ChIP-seq methods.  
470 Application of higher resolution techniques may be required to address this question.

471

472 Given that piRNAs have co-opted *trans*-acting factors from snRNA biogenesis (Kasper et  
473 al., 2014), it would not be surprising if piRNAs also co-evolved *cis*-regulatory elements  
474 for transcription factor binding from snRNA loci. Recently, Beltran et al. (2019) identified  
475 similarity between the 3' end of PSEs of snRNA promoters and the 8 nt piRNA core motif  
476 in nematodes. In addition, Pol II and Pol III transcription from snRNA promoters share a  
477 common PSE, but are distinguished by the presence of other unique motifs (Hung and  
478 Stumph, 2010). Correspondingly, the canonical Type I and less abundant Type II piRNAs  
479 can be discriminated by the presence or absence of the 8 nt core motif, respectively.  
480 Factors such as TOFU-4 and TOFU-5 function in both Type I and II piRNA expression,  
481 whereas PRDE-1 is only required for Type I piRNAs (Kasper et al., 2014; Weng et al.,



482 2018). Altogether, these observations highlight the importance of *cis*-regulatory elements  
483 in specifying the expression of snRNAs and piRNA classes. In addition to enrichment of  
484 cytosine at the 5' position in the male core motif (Billi et al., 2013), we hypothesize that  
485 as-yet unidentified motifs may further discriminate male from female piRNA promoters.  
486 While we observed SNPC-1.3 binding to be enriched upstream of male piRNA loci (Figure  
487 3), we cannot definitively conclude that SNPC-1.3 binds to the male-specific core motif,  
488 given the limitations of conventional ChIP-seq in resolving the SNPC-1.3 footprint.  
489 Identifying the factors that specifically bind the 8 nt core motif and other potential *cis*-  
490 regulatory elements important for sex-biased piRNA expression will require further  
491 investigation.

492

### 493 **What are the functions of male piRNAs in *C. elegans*?**

494 Our data suggest that SNPC-1.3 is essential for proper spermiogenesis (Figure 5). We  
495 hypothesize the global loss of male piRNAs in a *snpc-1.3(-)* mutant is responsible for the  
496 higher incidence of spermiogenesis arrest and subsequent loss in fertility, although it is  
497 possible that SNPC-1.3 may have other or additional effects on male fertility.  
498 Characterization of *prg-1(-)* mutants during spermiogenesis agree with our findings that  
499 loss of piRNAs in the male germline leads to acute defects directly responsible for fertility  
500 (Wang and Reinke, 2008). Since the initial discovery of piRNA function in the targeting  
501 and silencing of transposons in *Drosophila* (Vagin et al., 2006; Brennecke et al., 2007),  
502 analyses in other systems have revealed that piRNAs have acquired neofunctions at later  
503 points along the evolutionary timescale (Ozata et al., 2019).

504

505 While it is estimated that as much as 45% of the human genome encodes for transposable  
506 elements (McCullers and Steiniger, 2007), only 12% of *C. elegans* genome encodes such  
507 elements. Furthermore, nearly all of these regions are inactive in *C. elegans* (Bessereau,  
508 2006). In contrast to *Drosophila* piRNAs that target and silence transposons with perfect  
509 complementarity (Brennecke et al., 2007), *C. elegans* piRNAs are thought to bind a broad  
510 range of endogenously expressed transcripts by partial complementarity (Ashe et al.,  
511 2012; Shen et al., 2018; Zhang et al., 2018). Together, these findings suggest that worm  
512 piRNAs function in capacities distinct from canonical transposon silencing. While a recent

513 methodology used cross-linking, ligation, and sequencing of piRNA:target hybrids  
514 (CLASH) to determine that female piRNAs engage with almost every germline transcript  
515 (Shen et al., 2018), how male piRNAs select their targets has yet to be examined. Like  
516 piRNAs characterized in the female germline, male piRNAs may be interfacing with a  
517 broad range of targets to regulate gene expression for proper spermatogenesis. Loss of  
518 *prg-1* in males causes the downregulation of a subset of spermatogenesis-specific genes  
519 (Wang and Reinke, 2008), suggesting male piRNAs serve a protective function for  
520 spermatogenic processes. The characterization of the *in vivo* landscape of male piRNA  
521 target selection using CLASH may provide insights into piRNA function during  
522 spermatogenesis.

523

### 524 **Why are male piRNAs restricted from the female germline by TRA-1?**

525 Sperm and oocytes pass epigenetic information such as noncoding RNAs to the next  
526 generation (Hammoud et al., 2014; Brykczynska et al., 2010; Tabuchi et al., 2018;  
527 Kaneshiro et al., 2019). Recent studies show maternal piRNAs trigger the production of  
528 endo-siRNAs, called 22G RNAs for their 5' bias for guanine and 22 nt length, to transmit  
529 an epigenetic memory of foreign versus endogenous elements to the next generation  
530 (Ashe et al., 2012; Buckley et al., 2012; Shirayama et al., 2012). We predict that  
531 misexpression of male piRNAs in the female germline may perturb the native pool of  
532 female piRNAs necessary for appropriate recognition of self versus non-self elements.  
533 This may explain the decrease in fertility we observed in multiple TRA-1 binding site  
534 mutant hermaphrodites (Figure S6B). As *snpc-1.3(3xtbs)* sperm do not seem to exhibit  
535 significant morphological defects (Figure 5), the fertility defects in the *snpc-1.3(3xtbs)*  
536 mutants could be due to problems arising in oogenesis. However, based on our  
537 sequencing data in *snpc-1.3(2xtbs)* mutants, we cannot distinguish whether fertility  
538 defects during oogenesis are due to upregulation of male piRNAs, downregulation of  
539 female piRNAs, a combination of the two, or misexpression of downstream endo-siRNAs  
540 triggered by piRNAs. Further study of *snpc-1.3* gain-of-function mutants in oogenesis will  
541 enhance our understanding of the physiological consequences of expressing male  
542 piRNAs in the female germline.

543

544 **The intersection between sex determination and sex-specification of piRNA**  
545 **expression.**

546 We speculate that gene duplication of the *snp-1* family of genes occurred early during  
547 nematode evolution and allowed for the acquisition of new functions by *snp-1* paralogs,  
548 specifically, from snRNA to piRNA biogenesis. At least two SNPC-1 paralogs are present  
549 within the distantly related nematode species, *Plectus sambesii*. Furthermore, we predict  
550 that the co-option of SNPC-1 paralogs for piRNA biogenesis may have occurred in  
551 parallel with the evolution of the nematode sex determination pathway. TRA-1 is a sex  
552 determination factor that acts to repress male-promoting gene expression in female germ  
553 cells to promote female germ cell fate. While *Drosophila* sex determination utilizes  
554 different factors than *C. elegans*, further investigation into the conservation of TRA-1  
555 shows that it is a common feature in at least the nematode lineage (Pires-daSilva and  
556 Sommer, 2004). Additionally, just as we have shown that TRA-1 represses *snp-1.3* in *C.*  
557 *elegans* (Figure 4), TRA-1 binding motifs GGG(A/T)GG are present in the putative  
558 upstream promoter regions of *snp-1.3* homologs identified in *C. briggsae*, *C. brenneri*  
559 and *C. nigoni* (Figure S6C). Taken together, these analyses point to a conserved link  
560 between sex determination and piRNA biogenesis pathways among nematodes.

561  
562 In summary, our work reveals that SNPC-1.3 is specified to the male germline and is  
563 essential for male piRNA expression. We have identified SNPC-1.3 as a major target of  
564 TRA-1 repression in the female germline. Future studies will likely uncover additional  
565 factors required to coordinate the proper balance of sex-specific piRNAs required for  
566 proper germline development and animal fertility.

567

568 **CONTACT FOR REAGENT AND RESOURCE SHARING**

569 Further information and requests for resources and reagents should be directed to and  
570 will be fulfilled by the Lead Contact, John K. Kim ([jnkim@jhu.edu](mailto:jnkim@jhu.edu)).

571

572 **EXPERIMENTAL MODEL AND SUBJECT DETAILS**

573 *C. elegans* strains were maintained at 20°C according to standard procedures (Brenner,  
574 1974), unless otherwise stated. Bristol N2 was used as the wildtype strain. Except for  
575 RNAi and ChIP experiments, worms were fed *E. coli* strain OP50. Worms used for ChIP  
576 were fed *E. coli* strain HB101.

577

578 **METHOD DETAILS**

579 **Generations of strains.**

580 CRISPR/Cas9-generated strains were created as described in Paix et al., 2015 and are  
581 listed in Table S4. crRNA and repair template sequences of CRISPR generated strains  
582 are listed in Table S4. After initial phenotyping of *snpc-1.3a::3xflag* and *snpc-1.3b::3xflag*  
583 (Figure S1), *snpc-1.3a::3xflag* was used for all subsequent experiments (and is referred  
584 to as *snpc-1.3::3xflag*).

585

586 **RNAi assays.**

587 Bacterial RNAi clones were grown from the Ahringer RNAi library (Kamath and Ahringer,  
588 2003). All clones used are listed in the Table S4. Synchronized L1 worms were plated on  
589 HT115 bacteria expressing dsRNA targeting the gene interest or L4440 empty vector as  
590 a negative control as previously described in (Timmons and Fire, 1998). All RNAi  
591 experiments were performed at 20°C unless otherwise stated.

592

593 **RNA extraction, library preparation, and sequencing.**

594 After hypochlorite preparation and hatching in M9 buffer, *snpc-4::aid::ollas* and *snpc-*  
595 *4::aid::ollas; P<sub>sun-1</sub>::TIR1* worms were transferred from NGM plates to plates containing  
596 250 μM auxin 20 h before collection of L4 and gravid worms, 48 and 72 h after plating L1  
597 worms, respectively. Worms were collected in TriReagent (Thermo Fisher Scientific) and  
598 subjected to three freeze-thaw cycles. Following addition of 1-bromo-3-chloropropane

599 (BCP), the aqueous phase was then precipitated with isopropanol at -80°C for 2 h. To  
600 pellet RNA, samples were spun at 21,000 x *g* for 30 min at 4°C. After three washes in  
601 75% ethanol, the pellet was resuspended in water.

602  
603 RNA concentration and quality was measured using a TapeStation (Agilent  
604 Technologies). 16–30 nt small RNAs were size-selected from 5 µg total RNA on 17%  
605 denaturing polyacrylamide gels. Small RNAs were treated with 5' polyphosphatase  
606 (Illumina) to reduce 5' triphosphate groups to monophosphates to enable 5' adapter  
607 ligation. Small RNA-sequencing libraries were prepared using the NEBNext® Multiplex  
608 Small RNA Library Prep Set for Illumina (NEB). Small RNA amplicons were size-selected  
609 on 10% polyacrylamide gels and quantified using qRT-PCR. Samples for each  
610 developmental time point were pooled into a single flow cell and single-end, 75 nt reads  
611 were generated on a NextSeq 500 (Illumina). An average of 42.01 million reads (range  
612 33.05–50.39 million) was obtained for each library.

613  
614 **Quantitative RT-PCR.**  
615 Taqman cDNA synthesis was performed as previously described (Weiser et al., 2017).  
616 Briefly, for quantification of piRNA levels, TaqMan small RNA probes were designed and  
617 synthesized by Applied Biosystems. All piRNA species assessed by qPCR were  
618 normalized to U18 small nucleolar RNA. 50 ng of total RNA was used for cDNA synthesis.  
619 cDNA was synthesized by Multiscribe Reverse Transcriptase (Applied Biosystems) using  
620 the Eppendorf Mastercycler Pro S6325 (Eppendorf). Detection of small RNAs was  
621 performed using the TaqMan Universal PCR Master Mix and No AmpErase® UNG  
622 (Applied Biosystems). The sequences used for developing custom small RNA probes  
623 used for Taqman qPCR are listed in Table S4. For quantification of mRNA levels, cDNA  
624 was made using 500 ng of total RNA using Multiscribe Reverse Transcriptase (Applied  
625 Biosystems). Assays for mRNA levels were performed with Absolute Blue SYBR Green  
626 (ThermoFisher) and normalized to *eft-2* using CFX63 Real Time System Thermocyclers  
627 (Biorad). All qPCR primers used are listed in Table S4.

628  
629 **Covalent crosslinking of Dynabeads.**

630 Protein G Dynabeads (ThermoFisher Scientific, 1003D) were coupled to monoclonal  
631 mouse anti-FLAG antibody M2 (Sigma Aldrich, F1804). After 3 washes in 1x PBST (0.1%  
632 Tween), Dynabeads were resuspended with 1x PBST with antibody, for a final  
633 concentration of 50  $\mu\text{g}$  antibody per 100  $\mu\text{L}$  beads. The antibody-bead mixture was  
634 nutated for 1 h at room temperature. After 3 washes in 1x PBST and 2 washes in 0.2 M  
635 sodium borate pH 9.0, beads were nutated in 22 mM DMP (Sigma Aldrich, D8388) in 0.2  
636 M sodium borate for 30 min at room temperature. Following 2 washes in ethanolamine  
637 buffer (0.2 M ethanolamine, 0.2 M NaCl pH 8.5), beads were nutated for 1 h at room  
638 temperature in the same buffer. Beads were placed into the same volume of  
639 ethanolamine buffer as the starting bead volume for storage at 4°C until use.

640

#### 641 **Immunoprecipitation for mass spectrometry and co-IP experiments.**

642 For SNPC-4 IP mass spectrometry, synchronized populations of ~200,000 *him-8(e1489)*  
643 L4s and ~50,000 *fem-1(hc17)* females were grown at 25°C and collected on OP50. For  
644 co-IP experiments, ~500,000 L4s and ~250,000 gravid worms were grown and collected  
645 from OP50 plates. After washing in M9, the gut was cleared for 15 min with nutation in  
646 M9 buffer before collection.

647

648 Unless otherwise stated, all samples for mass spectrometry and co-IP used in this study  
649 were subjected to the following procedure. After three washes in M9 and one wash in  
650 water, worms were frozen and ground using the Retsch MM400 ball mill homogenizer for  
651 2 rounds of 1 min at 30s<sup>-1</sup>. Frozen worm powder was resuspended in 1x lysis buffer used  
652 previously (Moissiard et al., 2014) (50 mM Tris-HCl pH 8.0, 150 mM NaCl, 5 mM MgCl<sub>2</sub>,  
653 1 mM EGTA, 0.1% NP-40, 10% glycerol) and protease inhibitor cocktail (Roche). After  
654 Bradford assay (ThermoFisher Scientific), lysates were normalized using lysis buffer and  
655 protease inhibitor. Benzodase (Sigma-Aldrich, E1014) was added to a final concentration  
656 of 1  $\mu\text{L}/\text{mL}$  of lysate and nutated for 10 min at 4°C. After centrifugation for 10 min at 4,000  
657 x g, 1 mL of supernatant was added to 50  $\mu\text{L}$  of crosslinked Dynabeads and nutated for  
658 15 min at 4°C. Samples were then washed 3 times in 1x lysis buffer with protease  
659 inhibitors before 1 h nutation in 50  $\mu\text{L}$  of 2 mg/mL FLAG peptide (Sigma-Aldrich, F4799)  
660 diluted in 1x lysis buffer. Complete eluate, as well as 5% of crude lysate (after addition of

661 benzonase), input, pellet, and post-IP samples were added to 2x Novex Tris-Glycine SDS  
662 Sample Buffer (ThermoFisher Scientific, LC2676) to 1x. Samples were then subjected to  
663 western blotting as described below.

664

#### 665 **Mass spectrometry and analysis.**

666 Proteins were precipitated with 23% TCA and washed with acetone. Protein pellets  
667 solubilized in 8 M urea, 100 mM Tris pH 8.5, and reduced with 5 mM Tris(2-  
668 carboxyethyl)phosphine hydrochloride (Sigma-Aldrich, St. Louis, MO, product C4706)  
669 and alkylated with 55 mM 2-Chloroacetamide (Fluka Analytical, product 22790). Proteins  
670 were digested for 18 h at 37°C in 2 M urea 100 mM Tris pH 8.5, 1 mM CaCl<sub>2</sub> with 2 µg  
671 trypsin (Promega, Madison, WI, product V5111). Single phase analysis (in replicate) was  
672 performed using a Dionex 3000 pump and a Thermo LTQ Orbitrap Velos using an in-  
673 house built electrospray stage (Wolters et al., 2001). Protein and peptide identification  
674 and protein quantitation were done with Integrated Proteomics Pipeline, IP2 (Integrated  
675 Proteomics Applications, Inc., San Diego, CA. <http://www.integratedproteomics.com/>).  
676 Tandem mass spectra were extracted from raw files using RawConverter (He et al., 2015)  
677 with monoisotopic peak option and were searched against protein database release  
678 WS260 from Wormbase, with FLAG-tagged SNPC-4, common contaminants and  
679 reversed sequences added, using ProLuCID (Peng et al., 2003; Xu et al., 2015). The  
680 search space included all fully-tryptic and half-tryptic peptide candidates with a fixed  
681 modification of 57.02146 on C. Peptide candidates were filtered using DTASelect (Tabb  
682 et al., 2002).

683

684 Using custom R scripts, average enrichment between SNPC-4::3xFlag and no-tag control  
685 immunoprecipitation experiments were calculated. For each experiment, enrichment was  
686 normalized by dividing the peptide count for each protein by the total peptide count.  
687 Adjusted *p*-values were calculated by applying the Bonferroni method using DESeq2  
688 (Love et al., 2014).

689

#### 690 **Western blotting.**

691 At least 250,000 L4 and 50,000 gravid worms were collected from OP50 plates. L4s were  
692 collected on empty vector L4440 or *snpc-1.3* RNAi. For *glp-4* temperature-shift  
693 experiments, worms grown at 15°C were egg prepped and hatched. Subsequent  
694 synchronized L1s were transferred to 25°C. After washing in M9, the gut was cleared for  
695 15 min with nutation in M9. After three washes in M9 and one wash in water, worms were  
696 frozen and pulverized using the Retsch MM400 ball mill homogenizer for 2 rounds of 1  
697 min at 30s<sup>-1</sup>. Frozen worm powder was resuspended in 1x lysis buffer used previously  
698 (Moissiard et al., 2014) (50 mM Tris-HCl pH 8.0, 150 mM NaCl, 5 mM MgCl<sub>2</sub>, 1 mM EGTA,  
699 0.1% NP-40, 10% glycerol, and protease inhibitor cocktail (Roche)). After Bradford assay  
700 (ThermoFisher Scientific), lysates were normalized using lysis buffer. Benzoylase (Sigma-  
701 Aldrich, E1014) was added to a final concentration of 1 μL/mL of lysate and nutated for  
702 10 min at 4°C. The lysate was then added to 4x loading buffer (200 mM Tris pH 6.8, 8%  
703 SDS, 0.4% bromophenol blue, 40% glycerol, 20% beta-mercaptoethanol) to a final  
704 concentration of 1x. Samples were run on either 8–16% or 8% Novex WedgeWell Tris-  
705 Glycine precast gels (ThermoFisher), and transferred to PVDF membrane (Millipore).  
706 Mouse anti-Flag, rabbit anti-gamma tubulin, and rabbit anti-H3 were used at 1:1,000,  
707 1:5,000, and 1:15,000, respectively. Anti-mouse and anti-rabbit (for tubulin) antibodies  
708 were used at 1:5,000. To blot for H3, anti-rabbit secondary was used at 1:15,000.  
709 Antibodies used were Sigma-Aldrich F1804 (mouse anti-Flag), Sigma-Aldrich T1450  
710 (rabbit anti-gamma tubulin), and Abcam ab1791 (rabbit anti-H3), GE Healthcare NA931  
711 (sheep anti-mouse), and Jackson Laboratories 111035045 (goat anti-rabbit). Both high  
712 sensitivity Amersham ECL Prime (GE Healthcare, RPN2232) (for SNPC-1.3 blotting) and  
713 regular sensitivity Pierce ECL (ThermoFisher, 32209) were used for exposure in a BioRad  
714 ChemiDoc Touch system.

715

#### 716 **Chromatin immunoprecipitation, library prep, and sequencing.**

717 Worms were grown in liquid culture as previously described (Zanin et al., 2011). 250 μM  
718 auxin was added to *snpc-1.3::3xflag*; *snpc-4::aid::ollas*; *P<sub>sun-1</sub>::TIR1* worms 4 h before  
719 collection at 48 h post L1 at 20°C. After washing, the gut was cleared for 15 min by  
720 nutation in M9, followed by three washes in M9. Worms were live-crosslinked in 2.6%  
721 formaldehyde in water for 30 min at room temperature with nutation. Crosslinking was



722 quenched with a final concentration of 125 mM glycine for 5 min with nutation. After three  
723 washes with water, worms were flash-frozen in liquid nitrogen. Frozen worm pellets were  
724 ground into powder using the Retsch MM40 ball mill homogenizer for 2 rounds of 1 min  
725 at 30s<sup>-1</sup>. Frozen worm powder was resuspended in 1x RIPA buffer (1xPBS, 1% NP-40,  
726 0.5% sodium deoxycholate, 0.1% SDS) for 10 min at 4°C. Crosslinked chromatin was  
727 sonicated using a Diagenode Bioruptor Pico for three 3-min cycles, 30 sec on/off. 10 µg  
728 chromatin was nutated overnight at 4°C with 2 µg of Flag antibody (Sigma-Aldrich, F1804)  
729 and then for 1.5 h with 50 µL mouse IgG Dynabeads (Invitrogen). Input amount was 10%  
730 of IP. Chromatin was de-crosslinked and extracted as described previously (Weiser et al.,  
731 2017). Individual input and IP samples of each genotype were processed for both  
732 sequencing and quantitative PCR.

733  
734 Libraries were prepared and multiplexed using the Ovation Ultralow Library Systems v2  
735 (NuGEN Technologies) according to the manufacturer's protocol. The Illumina HiSeq  
736 4000 platform was used to generate 50 bp single-end reads for SNPC-1.3 ChIP-seq  
737 libraries. The NovaSeq 6000 platform was used to generate 50 bp paired-end reads for  
738 TRA-1 ChIP libraries.

739

#### 740 **Quantitative PCR of ChIP samples.**

741 ChIP DNA was eluted in 18 µL of 1x TE pH 8.0 and 2 µL of 20 mg/mL RNase A (Invitrogen,  
742 Thermo Fisher Scientific). For a final reaction volume of 25 µL, each reaction consisted  
743 of final 1x Absolute Blue SYBR Green (Thermo Fisher Scientific), 35 nM each of forward  
744 and reverse primer, and 2 µL ChIP eluate. Reactions were performed in technical  
745 duplicates in a BioRad CF96 Real Time PCR thermal cycler.

746

#### 747 **Hermaphrodite fertility assays.**

748 Gravid worms (previously maintained at 20°C) were subjected to hypochlorite treatment  
749 and their progeny were plated onto NGM at 25°C (P0). At the L2 or L3 stage, worms were  
750 singled onto individual plates and their progeny (F1) counted.

751

#### 752 **Mating assays.**

753 To test male-dependent rescue of *fem-1(hc17)* fertility, 10–12 hermaphrodites of each  
754 strain were grown at 20°C and embryos were isolated by allowing egg lay for 2 h before  
755 removal. Embryos were shifted to 25°C and upon reaching the L4 stage (24 h), ten *him-*  
756 *8(e1489)* L4 males were transferred and mated with two *fem-1(hc17)* females. Brood size  
757 was quantified by counting when a majority of progeny had at least reached the young  
758 adult stage (about 3 days after transfer). To test the fertility of the hermaphrodites upon  
759 mating, 10–12 hermaphrodites of each strain were grown at 20°C and embryos were  
760 isolated after egg lay for 2 h before removal. Embryos were shifted to 25°C and ten *col-*  
761 *19(GFP+)* L4-staged males (24 h) were then transferred with a single hermaphrodite (36  
762 h) and the number of live cross progeny were counted after reaching adulthood. Brood  
763 size was quantified by counting when the majority of progeny had at least reached the  
764 young adult stage (about 3 days after transfer).

765

#### 766 **Sperm activation assay and imaging.**

767 To perform sperm activation assays, spermatids were dissected from adult males that  
768 were shifted to 25°C during the embryo stage, and isolated prior to sexual maturity (about  
769 48 h post L1). Dissection was performed directly on glass slides in sperm medium (50  
770 mM HEPES pH 7.8, 50 mM NaCl, 25 mM KCl, 5 mM CaCl<sub>2</sub>, and 1 mM MgSO<sub>4</sub>)  
771 supplemented with 20 µg/mL pronase E (Millipore Sigma). For the characterization of  
772 sperm morphology, sperm were imaged 30 min after the addition of pronase E. Individual  
773 sperm were manually categorized into two types: spermatids with normal pseudopods or  
774 spermatids with irregular or no pseudopods (Shakes and Ward, 1989). For Figure 5E, Z  
775 stacks were imaged in 10 sec intervals for 30 min and a representative in-focus stack was  
776 chosen at every 3 min interval. To characterize sperm activation dynamics, sperm were  
777 individually followed across 10 sec intervals for 30 min and the different stages of sperm  
778 activation were designated into four categories based on these morphological changes:  
779 1) undifferentiated spermatid, 2) intermediate spindles characterized by the presence of  
780 spike growth, 3) growing or motile pseudopod by the presence of a pseudopod, and 4)  
781 immobile sperm when little movement was observed either in the sperm body or  
782 pseudopod for longer than 30 sec. Statistical significance was assessed using Student's  
783 t-test

784

## 785 **QUANTITATIVE AND STATISTICAL ANALYSIS**

786 Unless otherwise stated, all quantitative analyses are shown as mean with standard  
787 deviation represented as error bars. For qRT-PCR, fertility and mating assays, and  
788 western blot, at least 2 independent experiments were performed; one representative  
789 biological replicate is shown.

790

### 791 **Small RNA-seq analysis.**

792 Raw small RNA-seq reads were trimmed for Illumina adapters and quality (SLIDING  
793 WINDOW: 4:25) using Trimmomatic 0.39 (Bolger et al., 2014). Trimmed reads were then  
794 filtered using bbmap 38.23 (<http://jgi.doe.gov/data-and-tools/bb-tools>) to retain reads that  
795 were 15–30 nt in length. These filtered reads were aligned to the *C. elegans* WBcel235  
796 (Cunningham et al., 2018) reference genome using Bowtie 1.1.1 (Langmead et al., 2009)  
797 with parameters `-v 0 -k 5 -best -strata -tryhard`. Quality control of raw and aligned reads  
798 was performed using FastQC 0.11.7  
799 (<http://www.bioinformatics.babraham.ac.uk/projects/fastqc/>), SAMtools 1.9 (Li et al.,  
800 2009) and in-house Python and R scripts. Mapped reads were assigned to genomic  
801 features using featureCounts from Subread 1.6.3 (Liao et al., 2014), taking into account  
802 overlapping and multi-mapping reads (`-O -M`). Raw counts were normalized within  
803 DESeq2 1.26.0 (Love et al., 2014) and principal component analysis (PCA) was  
804 performed using the regularized log transform of normalized counts within DESeq2  
805 (Figure S5C).

806

807 To identify differentially expressed genes, DESeq2 was applied to piRNAs on  
808 chromosome IV. In this study (method 1), we define significant and differentially  
809 expressed genes as having an absolute value of  $\log_2(\text{fold-change}) \geq 0.26$  and FDR of  $\leq$   
810 0.05 (Benjamini-Hochberg). Contrasts between mutant and wildtype were designed  
811 without independent filtering.

812

813 For motif discovery, nucleotide sequences were extracted from the reference genome  
814 with 60 nt upstream of each piRNA and submitted to the MEME suite 5.1.1 (Bailey et al.,  
815 2009). Results from MEME were used to generate the Logo plot with the median position

816 of the C-nucleotide of the identified motif, the number of piRNAs that share the motif, and  
817 the associated E-value.

818  
819 A second, independent small RNA-seq analysis workflow (described in Figure S2) was  
820 implemented to validate our results. Results produced from this analysis are provided in  
821 Figure S3. 16–30 nt small RNA sequences were parsed from adapters and reads with >3  
822 nt falling below a quality score of Q30 were discarded. Reads were mapped to the *C.*  
823 *elegans* WS230 (Stein et al., 2001) reference genome using CASHX v. 2.3 (Fahlgren et  
824 al., 2009) allowing for 0 mismatches. Custom Perl, Awk, and R scripts were used to count  
825 features and to generate PCA and size distribution plots. Multi-mapping reads were  
826 assigned proportionally to each possible locus. Differential expression analysis was done  
827 using DESeq2 v. 1.18.1 (Love et al., 2014). A reporting threshold was set at an absolute  
828 value of  $\log_2(\text{fold-change}) \geq 0.26$  and a Benjamini-Hochberg-corrected  $p \leq 0.20$ .

829  
830 **ChIP-seq analysis.**

831 De-multiplexed raw ChIP-seq data in FASTQ format were trimmed for adapters and  
832 sequencing quality score > Q25 using Trim Galore! 0.5.0  
833 ([http://www.bioinformatics.babraham.ac.uk/projects/trim\\_galore/](http://www.bioinformatics.babraham.ac.uk/projects/trim_galore/)) and aligned to *C.*  
834 *elegans* reference genome WBcel235 (Cunningham et al., 2018) using Bowtie2 2.3.4.2  
835 (Langmead and Salzberg, 2012) with default parameters. Post-alignment filtering was  
836 then performed to remove PCR duplicates using the MarkDuplicates utility within Picard  
837 2.22.1 (<http://broadinstitute.github.io/picard/>). In addition, SAMtools 1.9 was applied to  
838 remove unmapped reads and reads that mapped with MAPQ 30 but were not of primary  
839 alignment or failed sequence platform quality checks (SAMtools -F 1804 -q 30) (Li et al.,  
840 2009).

841  
842 To identify and visualize binding sites and peaks for SNPC-1.3 ChIP-seq, filtered SNPC-  
843 1.3 ChIP-seq reads were extended to 200 bp to account for the average length of ChIP  
844 fragments. We then partitioned the genome into consecutive, non-overlapping 1 kb bins  
845 and calculated read coverage, normalized by sequencing depth of each library, based on  
846 the total read count in each bin. Bins with read coverages in the IP sample that fell below  
847 the median read coverage of piRNA-depleted bins on chromosome IV in the relevant input

848 control were excluded from further analysis. Bins containing only male, female, and non-  
849 germline enriched piRNAs (as defined by small RNA-seq analysis) were then extracted  
850 to generate binding profiles and heatmaps. For this, the bamCompare tool in deepTools  
851 3.3.1 (Ramírez et al., 2016) was used to calculate the ratio between read coverage of  
852 each ChIP sample and input control (--scaleFactorsMethod None --normalizeUsing CPM  
853 --operation ratio --binSize 50 --ignoreForNormalization MtDNA --extendReads 200). The  
854 ENCODE ce11 blacklist was also supplied ([https://github.com/Boyle-](https://github.com/Boyle-Lab/Blacklist/tree/master/lists)  
855 [Lab/Blacklist/tree/master/lists](https://github.com/Boyle-Lab/Blacklist/tree/master/lists)). The bamCompare output was then used in deepTools  
856 computeMatrix to calculate scores for plotting profiles and heatmaps with deepTools  
857 plotProfile and plotHeatmap.

858  
859 TRA-1 ChIP-seq peaks were called by callpeak within MACS 2.1.2 (Zhang et al., 2008)  
860 (--pvalue 0.05) with filtered TRA-1 ChIP-seq reads and relevant input controls. TRA-1  
861 signal tracks were generated by calculating fold enrichment from read count-normalized  
862 genome-wide pileup and lambda track outputs by callpeak (bdgcmp in MACS2). The  
863 ENCODE ce 11 blacklist was supplied in this analysis ([https://github.com/Boyle-](https://github.com/Boyle-Lab/Blacklist/tree/master/lists)  
864 [Lab/Blacklist/tree/master/lists](https://github.com/Boyle-Lab/Blacklist/tree/master/lists)). The bamCompare tool in deepTools 3.3.1 (Ramírez et al.,  
865 2016) was used to quantify read coverage of each ChIP sample and input control.

866  
867 Reproducibility between SNPC-1.3 and TRA-1 ChIP-seq replicates (Figure S4C, S5E)  
868 was assessed by applying deepTools bamCompare, as described above, and deepTools  
869 plotCorrelation to depict pairwise correlations between replicates and compute the  
870 Pearson correlation coefficient.

871

## 872 **DATA AND SOFTWARE AVAILABILITY**

873 The mass spectrometry, small RNA-seq, and ChIP-seq data have been deposited in  
874 NCBI under GEO accession number: GSE152831. Processed data and scripts used for  
875 analysis are available at <https://github.com/starostikm/SNPC-1.3>.

876

## 877 **AUTHOR CONTRIBUTIONS**

878 Conceptualization of the study: CPC, RJT, and JKK; experimental design: CPC, RJT,  
879 and JKK; mass spectrometry analysis: JJM and JRY; ChIP library preparation and

880 sequencing: SF and SEJ; RNA library preparation and sequencing: BEM and TAM; all  
881 other experiments: EX, MAH, RJT, CPC; computational analysis: MRS, CPC, TAM,  
882 MCS; CPC, RJT, MRS, and JKK wrote the manuscript.

883

## 884 **ACKNOWLEDGEMENTS**

885 We thank Himani Galagali and Natasha Weiser for helpful comments on the manuscript.  
886 We thank members of the Kim Lab (Amelia Alessi, Mindy Clark, Gregory Fuller, Jessica  
887 Kirshner, Alex Rittenhouse, and Darius Mostaghimi), Tatjana Trcek, Angela Andersen,  
888 Aurelia Mapps, and Jacqueline Tay for helpful suggestions. Computational resources  
889 were provided by the Maryland Advanced Research Computing Center (MARCC). Some  
890 strains were provided by the *Caenorhabditis* Genetics Center, which is funded by the NIH  
891 Office of Research Infra-structure Programs (P40 OD010440). This work was supported  
892 by grants from the NSF DGE-1746891 (to R.J.T.), NIH R35 GM130272 (to S.E.J); NIH  
893 R35 GM119775 (to T.A.M.); and NIH R01 GM129301 and NIH R01 GM118875 (to  
894 J.K.K.).

895

## 896 **COMPETING INTERESTS**

897 The authors declare no competing interests.

898

## 899 **FIGURE LEGENDS**

900

901 **Figure 1. SNPC-4 and SNPC-1.3 are part of the male piRNA transcription complex.**  
902 (A) SNPC-4 is required for both male and female piRNA expression. Taqman qPCR of  
903 male (left) and female (right) piRNAs during spermatogenesis and oogenesis in *snpc-*  
904 *4::aid* (denoted as -) and *snpc-4::aid; P<sub>sun-1</sub>::TIR1* (denoted as +) worms. Error bars  
905 indicate  $\pm$  SD from two technical replicates. (B) Schematic highlights the conservation of  
906 SNAPc homologs from *C. elegans*, *D. melanogaster*, and *H. sapiens* and catalogs all  
907 SNPC-4 (orange) interacting partners from previous work (Weick et al., 2014; Weng et  
908 al., 2018) or from our own analysis. Known piRNA biogenesis factors (purple), SNPC-1  
909 paralogs (green), and SNPC-3 paralogs (grey) are indicated. (C) SNPC-1.3 interacts with  
910 SNPC-4 in only *him-8(-)* mutants. Volcano plots showing enrichment values and

911 analogous significance values for proteins that co-purified with SNPC-4::3xFlag from (top)  
912 *him-8(-)* mutants (n=2 biological replicates) or (bottom) *fem-1(-)* mutants (n=2 biological  
913 replicates). piRNA biogenesis factors (purple), SNPC-1 paralogs (green), and SNPC-3  
914 paralogs (dark grey) are labeled in Figure 1B. (D) SNPC-1.3 is predominantly expressed  
915 in the male germline. Western blot of SNPC-1.3::3xFlag expression during  
916 spermatogenesis (spe.) and oogenesis (oog.) at 20°C and expression in germline-less  
917 *glp-4(bn2)* worms at 25°C during spermatogenesis (spe.). RNAi of *snpc-1.3* served to  
918 identify the SNPC-1.3::3xFlag band; \* denotes non-specific bands. (E) SNPC-4 interacts  
919 with SNPC-1.3. Anti-Flag immunoprecipitation of SNPC-4::3xFlag and western blot for  
920 SNPC-1.3::Ollas during spermatogenesis (spe.) and oogenesis (oog.). PRDE::Ollas was  
921 used as a positive control for interaction with SNPC-4::3xFlag (Kasper et al., 2014).  $\gamma$ -  
922 tubulin was used as the loading control.

923

## 924 **Figure 2. SNPC-1.3 is required for transcription of male piRNAs**

925 (A) *snpc-1.3* is required for male piRNA expression during spermatogenesis (spe.) but is  
926 dispensable for female piRNA expression during oogenesis (oog.). Taqman qPCR and  
927 quantification of representative male (left) and female (right) piRNAs at spermatogenic  
928 and oogenic time points. Error bars indicate  $\pm$  SD from two technical replicates. (B) *him-*  
929 *8(-)*; *snpc-1.3(-)* mutant males exhibit severely impaired male piRNA expression and  
930 enhanced female piRNA expression. *snpc-1.3* is not required for male or female piRNA  
931 expression in *fem-1(hc17)* females. Error bars indicate  $\pm$  SD from two technical replicates.  
932 (C) piRNAs are differentially expressed during spermatogenesis (spe.) and oogenesis  
933 (oog.) in wild-type worms. (Top) Volcano plot showing piRNAs with  $\geq 1.2$ -fold change and  
934 FDR of  $\leq 0.05$  in 48 h (spe.) versus 72 h (oog.). piRNAs are colored according to male  
935 and female enrichment scores from Billi et al., 2013. (Bottom) Overlap of male piRNAs in  
936 wildtype at 48 h (spe.) with oogenesis- and spermatogenesis-enriched piRNAs defined in  
937 from Billi et al., 2013. (D) piRNAs depleted in *snpc-1.3(-)* comprise mostly of  
938 spermatogenesis-enriched piRNAs. (Top) Volcano plot shows piRNAs with  $\geq 1.2$ -fold  
939 change and FDR  $< 0.05$  in *snpc-1.3(-)* mutant versus wildtype during spermatogenesis  
940 (spe.). piRNAs are colored according to male and female enrichment scores from Billi et  
941 al., 2013. (Bottom) Overlap of *snpc-1.3*-dependent piRNAs with oogenesis (oog.)- and

942 spermatogenesis (*spe.*)-enriched piRNAs defined in Billi et al., 2013. (E) Male piRNAs  
943 that are depleted *snpc-1.3(-)* have a conserved upstream motif with a strong 5' C bias.  
944 (Top) Overlap of *snpc-1.3*-dependent piRNAs with male piRNAs shown in Figure 2C.  
945 (Bottom) Logo plot displays conserved motif upstream of each piRNA. Median position of  
946 the C-nucleotide of the identified motif, number of piRNAs sharing the motif, and  
947 associated E-value are listed. (F) Female piRNAs are upregulated in *snpc-1.3(-)* mutants  
948 during spermatogenesis. (Top) Overlap of piRNAs upregulated at 72 h (oog.) with piRNAs  
949 enriched in *snpc-1.3(-)* at 48 h (*spe.*). (Bottom) Logo plot displays conserved motif  
950 upstream of each piRNA. Median position of the C-nucleotide of the identified motif,  
951 number of piRNAs sharing the motif, and associated E-value are listed.

952

953 **Figure 3. SNPC-1.3 binds male piRNA loci in a SNPC-4-dependent manner.**

954 (A) SNPC-1.3 binding at the piRNA clusters requires SNPC-4. SNPC-1.3::3xFlag binding  
955 normalized to input (mean  $\pm$  SD of two technical replicates) on chromosome IV by ChIP-  
956 qPCR in a no-tag control, the strain expressing SNPC-4::3xFlag (wildtype), and in the  
957 strain expressing SNPC-4::3xFlag::AID, which undergoes TIR-1-mediated degradation  
958 by addition of auxin (*snpc-4::aid*). These labels (no-tag, wild-type, and *snpc-4::aid*) apply  
959 throughout Figure 3. Top panel depicts the density of piRNAs on chromosome IV with  
960 piRNAs predominantly found in the small (4.5–7 Mb) and big (13.5–17.2 Mb) cluster. (B)  
961 SNPC-1.3 binding profiles across chromosome IV in no-tag control, wildtype, and *snpc-*  
962 *4::aid*. The locations of the two piRNAs clusters are highlighted. (C) SNPC-1.3 binding is  
963 enriched at piRNA clusters on chromosome IV. SNPC-1.3-bound regions are enriched  
964 within piRNA clusters compared to regions outside of the piRNA clusters on chromosome  
965 IV (\*\*\*\*  $p \leq 0.0001$ , Wilcoxon rank sum test). The number of bins analyzed is listed in  
966 parentheses. (D) SNPC-1.3 enrichment at piRNA clusters is dependent on SNPC-4.  
967 SNPC-1.3-bound regions within piRNA clusters are depleted compared to regions outside  
968 of the piRNA clusters on chromosome IV upon loss of SNPC-4 (\*\*\*\* $p \leq 0.0001$ , Wilcoxon  
969 rank sum test). The number of bins analyzed is listed in parentheses. (E) Distribution of  
970 SNPC-1.3 reads (mean density  $\pm$  standard error) around the 5' nucleotide of mature  
971 piRNAs at the piRNA clusters. To resolve SNPC-1.3 binding between male and female  
972 piRNAs despite the high density of piRNAs, we selected 1 kb bins with all male (100),



973 female (19), or non-germline enriched (279) piRNAs. (F) Examples of SNPC-1.3 binding  
974 at two regions containing two male piRNA loci. Regions are anchored on the 5' nucleotide  
975 of each mature male piRNA and show mean read density  $\pm$  standard error.

976

977 **Figure 4. TRA-1 represses *snp-1.3* and male piRNAs expression during oogenesis.**

978 (A) *snp-1.3* mRNA levels peak during early spermatogenesis (spe.) while *tra-1* mRNA  
979 levels are highest during oogenesis (oog.). qRT-PCR and quantification of *snp-1.3*,  
980 *snp-4*, and *tra-1* mRNA normalized to *eft-2* mRNA across hermaphrodite development.  
981 Error bars:  $\pm$  SD of two technical replicates. (B) TRA-1 binds to the *snp-1.3* promoter.  
982 Schematic of the three TRA-1 binding sites upstream of the *snp-1.3* locus in wildtype  
983 (top). Site-specific mutations shown in red were made in one, two, or three of the TRA-1  
984 binding sites (grey denotes the mutated motifs). (Bottom) TRA-1 binding is reduced in  
985 TRA-1 binding site mutants assayed by TRA-1 ChIP-seq. (C) TRA-1 represses *snp-1.3*  
986 mRNA expression during oogenesis. (Left) *snp-1.3* mRNA expression is drastically  
987 upregulated upon RNAi-mediated knockdown of *tra-1* and (middle) in strains bearing  
988 mutations in two (*2xtbs*) or three (*3xtbs*) TRA-1 binding sites. Error bars indicate  $\pm$  SD  
989 from two technical replicates. (Right) Western blot of SNPC-1.3::3xFlag expression driven  
990 under the wild-type and *2xtbs* mutant promoter during spermatogenesis (spe.) (top) and  
991 oogenesis (oog.) (bottom). H3 was used as the loading control. (D) A subset of male  
992 piRNAs are ectopically expressed during oogenesis in *snp-1.3(2xtbs)* mutants. (Top)  
993 Volcano plot showing differential piRNA expression between *snp-1.3(2xtbs)* mutants  
994 versus wildtype during oogenesis (oog.). piRNAs are colored by enrichment scores from  
995 Billi et al., 2013. (Bottom) Overlap of male piRNAs defined in Figure 2C with upregulated  
996 piRNAs in *snp-1.3(2xtbs)* mutants. (E) Mutations at two (*2xtbs*) or three (*3xtbs*) TRA-1  
997 binding sites enhance male piRNA expression (top) but attenuate female piRNA  
998 expression (bottom) during oogenesis. Error bars indicate  $\pm$  SD from two technical  
999 replicates.

1000

1001 **Figure 5. SNPC-1.3 is critical for male fertility.**

1002 (A) *snp-1.3(-)* hermaphrodites exhibit sterility at 25°C. Circles correspond to the number  
1003 of viable progeny from singled hermaphrodites (n=16). Black bars indicate mean  $\pm$  SD.

1004 Statistical significance was assessed using Welch's t-test (\*\*\*\* $p \leq 0.0001$ ) (B) *snpc-1.3*  
1005 promotes male fertility but is dispensable for female fertility (Left) Diagram illustrates  
1006 crosses between strains for mating assays (*1.3(-)* denotes *snpc-1.3(-)*). (Right) *snpc-1.3(-)*  
1007 ); *him-8(-)* males crossed to *fem-1(-)* females show severe fertility defects (Cross 3). *snpc-*  
1008 *1.3; fem-1(-)* females crossed to *him-8(-)* males (Cross 2) show equivalent fertility similar  
1009 to *fem-1(-)* females crossed to *him-8(-)* males (Cross 1). Circles correspond to the number  
1010 of viable progeny from cross ( $n=16$ ). Black bars indicate mean  $\pm$  SD. Statistical  
1011 significance was assessed using Welch's t-test (ns: not significant; \*\*\*\* $p \leq 0.0001$ ) (C)  
1012 *snpc-1.3(-)* spermatids exhibit severe morphological defects. Images of pronase-treated  
1013 sperm of wildtype, *prg-1(-)*, *snpc-1.3(-)*, and *snpc-1.3(2xtbs)* males. (D) *snpc-1.3(-)*  
1014 spermatids exhibit severe sperm maturation defects. (E) (Top) Images depicted at 3 min  
1015 intervals of a sperm undergoing activation and maturation. Imaging of spermatid  
1016 commenced  $\sim 3$  min after pronase treatment. (Bottom) Graphical display of individual  
1017 sperm tracked over time after pronase treatment.

1018

1019 **Figure 6. Model illustrating the dynamics of male and female piRNA transcription**  
1020 **across *C. elegans* sexual development.**

1021 In wild-type worms, male piRNA and female piRNA expression peaks during  
1022 spermatogenesis and oogenesis, respectively. (Top) In *snpc-1.3(-)* mutants, male piRNA  
1023 expression is abrogated, and female piRNA expression is moderately enhanced across  
1024 sexual development relative to wildtype. In TRA-1 binding site mutants, *snpc-1.3*  
1025 expression is de-repressed causing ectopic upregulation of male piRNAs and moderate  
1026 repression of female piRNA expression during oogenesis relative to wildtype. (Bottom)  
1027 During spermatogenesis, SNPC-1.3 interacts with SNPC-4 at male piRNA promoters  
1028 regions to drive male piRNA transcription. During oogenesis, TRA-1 represses the  
1029 transcription of *snpc-1.3* which results in the suppression of male piRNA transcription,  
1030 thus leading to enhanced transcription of female piRNAs.

1031

1032

1033 **SUPPLEMENTAL FIGURE LEGENDS**

1034

1035 **Figure S1: Related to Figure 1. Validation of strains and mass spectrometry**

1036 (A) SNPC-4::AID is substantially degraded at 250  $\mu$ M auxin in the germline. Western blot  
1037 of SNPC-4::AID::Ollas in worms placed on various auxin concentrations (0, 25, 50, 100,  
1038 250, 500, 1000  $\mu$ M) for 1 h. The germline promoter *Psun-1* was used to drive expression  
1039 of the *A. thaliana* TIR1.  $\gamma$ -tubulin is the loading control. (B) Table showing the peptide  
1040 counts of SNAPc homologs and piRNA biogenesis proteins identified from mass  
1041 spectrometry of immunopurified SNPC-4::3xFlag from *fem-1(-)* and *him-8(-)* strains. (C)  
1042 *snpc-1.3a::3xflag* strain has wild-type fertility at 25°C. Black bars indicate mean  $\pm$  SD of  
1043 n=10 worms (wildtype versus *snpc-1.3(-)* mutant \*\*p  $\leq$  0.005, Welch's t-test). (D) *snpc-*  
1044 *1.3a::3xflag* strain has wild-type levels of male and female piRNAs during  
1045 spermatogenesis and oogenesis. *1.3(-)* denotes *snpc-1.3(-)*. *1.3a::3xflag* denotes *snpc-*  
1046 *1.3a::3xflag*. Error bars indicate  $\pm$  SD from two technical replicates. (E) *snpc-1.3b::3xflag*  
1047 strain has wild-type fertility at 25°C. Black bars indicate mean  $\pm$  SD of n=10 worms  
1048 (wildtype versus *snpc-1.3(-)* mutant \*\*\*p  $\leq$  0.0001, Welch's t-test). (F) *snpc-1.3b::3xflag*  
1049 strain has wild-type levels of male and female piRNAs during spermatogenesis and  
1050 oogenesis. *1.3(-)* denotes *snpc-1.3(-)*. *1.3b::3xflag* denotes *snpc-1.3b::3xflag*. Error bars  
1051 indicate  $\pm$  SD from two technical replicates. (G) SNPC-1.3 interacts with SNPC-4.  
1052 Reciprocal immunoprecipitation of Figure 1E. Anti-Flag immunoprecipitation of SNPC-  
1053 1.3::3xFlag and Western blot of SNPC-4::Ollas during spermatogenesis and oogenesis.  
1054  $\gamma$ -tubulin is the loading control.

1055

1056 **Figure S2: Related to Figure 2. Small RNA-seq analysis pipeline.**

1057 Two independent workflows (method 1 and method 2) were applied for differential  
1058 expression analysis.

1059

1060 **Figure S3: Related to Figure 2. Quality control of small RNA-seq and validation**  
1061 **analysis**

1062 (A) Mapped reads distributed by read length and 5' nucleotide identity (B) (Top) Volcano  
1063 plot showing differential piRNA expression between spermatogenesis and oogenesis in  
1064 wild-type worms. piRNAs are colored according to male and female enrichment scores  
1065 from Billi et al., 2013. Analysis shown is from a second, independent small RNA-seq

1066 analysis workflow (method 2). (Bottom) Overlap of male piRNAs in wildtype at 48 h with  
1067 oogenesis- and spermatogenesis-enriched piRNAs defined in Billi et al., 2013. (C) (Top)  
1068 Volcano plot showing differential piRNA expression between *snpc-1.3(-)* mutants versus  
1069 wildtype during spermatogenesis. piRNAs are colored by enrichment scores of male and  
1070 female piRNAs defined in Billi et al., 2013. Analysis shown is from a second, independent  
1071 small RNA-seq analysis workflow (method 2). (Bottom) Overlap of SNPC-1.3-dependent  
1072 piRNAs with previously identified spermatogenesis- and oogenesis-enriched piRNAs (Billi  
1073 et al., 2013). (D) Most SNPC-1.3-dependent piRNAs overlap with male piRNAs (as  
1074 defined in S3B) (top) and are enriched for the upstream 8 nt core motif showing a bias for  
1075 C at the 5' position (bottom).

1076

1077 **Figure S4: Related to Figure 3. SNPC-1.3 ChIP-seq pipeline and quality control and**  
1078 **biological replicates for SNPC-1.3 ChIP**

1079 (A) SNPC-1.3 binding at the piRNA clusters requires SNPC-4. Two biological replicates  
1080 of the experiment shown in Figure 3A. Top panel depicts the density of piRNAs on  
1081 chromosome IV, showing piRNAs are predominantly found in a small (4.5–7 Mb) and big  
1082 (13.5–17.2 Mb) cluster. SNPC-1.3::3xFlag binding normalized to input (mean  $\pm$  SD of two  
1083 technical replicates) on chromosome IV by ChIP-qPCR in a no-tag control, the strain  
1084 expressing SNPC-4::3xFlag (wildtype), and in the strain expressing SNPC-  
1085 4::3xFlag::AID, which undergoes TIR-1-mediated degradation by addition of auxin (*snpc-*  
1086 *4::aid*). These labels (no-tag, wild-type, and *snpc-4::aid*) apply throughout Figure S4. (B)  
1087 SNPC-1.3 ChIP-seq analysis workflow. (C) Pairwise Pearson correlations between  
1088 SNPC-1.3 ChIP-seq biological replicates. (D) Biological replicate of Figure 3B. The  
1089 locations of the two piRNAs clusters are highlighted. (E) SNPC-1.3 binding is enriched at  
1090 piRNA clusters on chromosome IV. Biological replicate of Figure 3C. Regions within  
1091 piRNA clusters are enriched for SNPC-1.3 binding compared to regions outside of the  
1092 piRNA clusters on chromosome IV (\*\*\*\*  $p \leq 0.0001$ , Wilcoxon rank sum test). The number  
1093 of bins analyzed is listed in parentheses. (F) SNPC-1.3 enrichment at piRNA clusters is  
1094 dependent on SNPC-4. Biological replicate of Figure 3D. SNPC-1.3-bound regions within  
1095 piRNA clusters are depleted compared to regions outside of the piRNA clusters on  
1096 chromosome IV upon loss of SNPC-4 (\*\*\*\*  $p \leq 0.0001$ , Wilcoxon rank sum test). The

1097 number of bins analyzed is listed in parentheses. (G) Biological replicate of enrichment  
1098 profiles shown in Figure 3E. Distribution of SNPC-1.3 reads (mean density  $\pm$  standard  
1099 error) around the 5' nucleotide of mature piRNAs at the piRNA clusters. To resolve SNPC-  
1100 1.3 binding between male and female piRNAs despite the high density of piRNAs, we  
1101 selected 1 kb bins with all male (135), female (20), or non-germline enriched (337)  
1102 piRNAs. (H) Examples of SNPC-1.3 binding at two regions containing two male piRNA  
1103 loci. Regions are anchored on the 5' nucleotide of each mature male piRNA and show  
1104 mean read density  $\pm$  standard error.

1105

1106 **Figure S5: Related to Figure 4. TRA-1 regulation of *snpc-1.3* across hermaphrodite**  
1107 **development**

1108 (A) Male and female piRNA levels peak during spermatogenesis and oogenesis,  
1109 respectively. Male piRNA levels are severely impaired but female piRNA expression is  
1110 upregulated during hermaphrodite development in *snpc-1.3* mutants. Taqman qPCR and  
1111 quantification of male and female piRNAs across hermaphrodite development. Error bars:  
1112  $\pm$  SD of two technical replicates. (B) Mapped reads distributed by read length and 5'  
1113 nucleotide identity of 3 biological replicates. (C) Principal component (PC) analysis of  
1114 piRNA expression based on rlog transformation of normalized counts. The scatter plot  
1115 depicts the first two principal components. Percentage on each axis represents the  
1116 percentage of variation accounted for by each principal component. (D) TRA-1 binds to  
1117 the *snpc-1.3* promoter. Biological replicate of Figure 4B. Schematic of the three TRA-1  
1118 binding sites upstream of the *snpc-1.3* locus in wildtype (top). (Bottom) TRA-1 binding is  
1119 progressively reduced with the increase in number of TRA-1 binding sites mutated. (E)  
1120 Pairwise Pearson correlations between TRA-1 ChIP-seq biological replicates.

1121

1122 **Figure S6: Related to Figure 5. SNPC-1.3 is critical for male fertility.**

1123 (A) *snpc-1.3* is required in males, but not females, to promote fertility. (Left) Diagram  
1124 illustrates crosses between strains for mating assays. Green worms represent *col-*  
1125 *19::GFP* males. (Right) *snpc-1.3(-); col-19::GFP* males show diminished ability to rescue  
1126 wild-type or *snpc-1.3(-)* hermaphrodites when compared to *col-19::GFP* males. Circles  
1127 correspond to the brood size of viable progeny from each mating (n=16). Black bars

1128 indicate mean  $\pm$  SD. Statistical significance was assessed using Welch's t-test (ns: not  
1129 significant; \*\* $p \leq 0.005$ ; \*\*\*\* $p \leq 0.0005$ ). (B) *snpc-1.3(2xtbs)* and *snpc-1.3(3xtbs)* mutant  
1130 hermaphrodites have decreased fertility at 25°C. Black bars indicate mean  $\pm$  SD (n = 16).  
1131 Statistical significance was assessed using Welch's t-test (\*\*\*\* $p \leq 0.0001$ ). (C) Multiple  
1132 TRA-1 binding sites are conserved in *C. elegans*, *C. brenneri*, *C. briggsae*, and *C. nigoni*.  
1133 Sequence alignment of *snpc-1.3* homologs in other nematode species. Blue indicates  
1134 sequences in TRA-1 binding motifs.

1135

1136 **Table S1: Differential expression of piRNAs in wild-type worms during**  
1137 **spermatogenesis and oogenesis. Related to Figure 2.**

1138

1139 **Table S2: Differential expression of piRNAs in wildtype and *snpc-1.3(-)* mutants**  
1140 **during spermatogenesis. Related to Figure 2.**

1141

1142 **Table S3: Differential expression of piRNAs in wildtype and *snpc-1.3(2xtbs)***  
1143 **mutants during oogenesis. Related to Figure 4.**

1144

1145 **Table S4. List of strains, guides, repair templates, and oligos used in this study**

1146

1147

1148

1149

1150

1151

1152

1153

1154

1155

1156

1157

1158 **REFERENCES**

- 1159 Andersen, P.R., Tirian, L., Vunjak, M., and Brennecke, J. (2017). A heterochromatin-  
1160 dependent transcription machinery drives piRNA expression. *Nature* 549, 54-59.
- 1161 Aravin, A., Gaidatzis, D., Pfeffer, S., Lagos-Quintana, M., Landgraf, P., Iovino, N., Morris,  
1162 P., Brownstein, M.J., Kuramochi-Miyagawa, S., Nakano, T., et al. (2006). A novel class  
1163 of small RNAs bind to MILI protein in mouse testes. *Nature* 442, 203-207.
- 1164 Aravin, A.A., Lagos-Quintana, M., Yalcin, A., Zavolan, M., Marks, D., Snyder, B.,  
1165 Gaasterland, T., Meyer, J., and Tuschl, T. (2003). The small RNA profile during  
1166 *Drosophila melanogaster* development. *Dev. Cell* 5, 337-350.
- 1167 Armisen, J., Gilchrist, M.J., Wilczynska, A., Standart, N., and Miska, E.A. (2009).  
1168 Abundant and dynamically expressed miRNAs, piRNAs, and other small RNAs in the  
1169 vertebrate *Xenopus tropicalis*. *Genome Res.* 19, 1766-1775.
- 1170 Ashe, A., Sapetschnig, A., Weick, E.-M., Mitchell, J., Bagijn, M.P., Cording, A.C.,  
1171 Doebley, A.-L., Goldstein, L.D., Lehrbach, N.J., Pen, J.L., et al. (2012). piRNAs can  
1172 trigger a multigenerational epigenetic memory in the germline of *C. elegans*. *Cell* 150, 88-  
1173 99.
- 1174 Bailey, T.L., Boden, M., Buske, F.A., Frith, M., Grant, C.E., Clementi, L., Ren, J., Li, W.W.,  
1175 and Noble, W.S. (2009). MEME SUITE: Tools for motif discovery and searching. *Nucleic*  
1176 *Acids Res.* 37, W202-8.
- 1177 Batista, P.J., Ruby, J.G., Claycomb, J.M., Chiang, R., Fahlgren, N., Kasschau, K.D.,  
1178 Chaves, D.A., Gu, W., Vasale, J.J., Duan, S., et al. (2008). PRG-1 and 21U-RNAs interact  
1179 to form the piRNA complex required for fertility in *C. elegans*. *Mol. Cell* 31, 67-78.
- 1180 Beanan, M.J., and Strome, S. (1992). Characterization of a germ-line proliferation  
1181 mutation in *C. elegans*. *Development* 116, 755-766.
- 1182 Beltran, T., Barroso, C., Birkle, T.Y., Stevens, L., Schwartz, H.T., Sternberg, P.W., Fradin,  
1183 H., Gunsalus, K., Piano, F., Sharma, G., et al. (2019). Comparative epigenomics reveals  
1184 that RNA polymerase II pausing and chromatin domain organization control nematode  
1185 piRNA biogenesis. *Dev. Cell* 48, 793-810.
- 1186 Berkseth, M., Ikegami, K., Arur, S., Lieb, J.D., and Zarkower, D. (2013). TRA-1 ChIP-seq  
1187 reveals regulators of sexual differentiation and multilevel feedback in nematode sex  
1188 determination. *Proc. Natl. Acad. Sci. USA* 110, 16033-16038.
- 1189 Bessereau, J.-L. (2006). Transposons in *C. elegans*. In *Wormbook, The C. elegans*  
1190 *Research Community, WormBook* ed., doi/10.1895/wormbook.1.70.1,  
1191 <http://www.wormbook.org>.

- 1192 Billi, A.C., Freeberg, M.A., Day, A.M., Chun, S.Y., Khivansara, V., and Kim, J.K. (2013).  
1193 A conserved upstream motif orchestrates autonomous, germline-enriched expression of  
1194 *Caenorhabditis elegans* piRNAs. PLoS Genet. 9, e1003392.
- 1195 Bolger, A.M., Lohse, M., and Usadel, B. (2014). Trimmomatic: A flexible trimmer for  
1196 Illumina sequence data. Bioinformatics 30, 2114-2120.
- 1197 Brennecke, J., Aravin, A.A., Stark, A., Dus, M., Kellis, M., Sachidanandam, R., and  
1198 Hannon, G.J. (2007). Discrete small RNA-generating loci as master regulators of  
1199 transposon activity in *Drosophila*. Cell 128, 1089-1103.
- 1200 Brennecke, J., Malone, C.D., Aravin, A.A., Sachidanandam, R., Stark, A., and Hannon,  
1201 G.J. (2008). An epigenetic role for maternally inherited piRNAs in transposon silencing.  
1202 Science 322, 1387-1392.
- 1203 Brenner, S. (1974). The genetics of *Caenorhabditis elegans*. Genetics 77, 71-94.
- 1204 Brykczynska, U., Hisano, M., Erkek, S., Ramos, L., Oakeley, E.J., Roloff, T.C., Beisel, C.,  
1205 Schübeler, D., Stadler, M.B., and Peters, A.H.F.M. (2010). Repressive and active histone  
1206 methylation mark distinct promoters in human and mouse spermatozoa. Nat. Struct. Mol.  
1207 Biol. 17, 679-687.
- 1208 Buckley, B.A., Burkhart, K.B., Gu, S.G., Spracklin, G., Kershner, A., Fritz, H., Kimble, J.,  
1209 Fire, A., and Kennedy, S. (2012). A nuclear Argonaute promotes multigenerational  
1210 epigenetic inheritance and germline immortality. Nature 489, 447-451.
- 1211 Carmell, M.A., Girard, A., Kant, H.J.G. van de, Bourc'his, D., Bestor, T.H., Rooij, D.G. de,  
1212 and Hannon, G.J. (2007). MIWI2 is essential for spermatogenesis and repression of  
1213 transposons in the mouse male germline. Dev. Cell 12, 503-514.
- 1214 Cecere, G., Zheng, G.X.Y., Mansisidor, A.R., Klymko, K.E., and Grishok, A. (2012).  
1215 Promoters recognized by Forkhead proteins exist for individual 21U-RNAs. Mol. Cell 47,  
1216 734-745.
- 1217 Chen, P., and Ellis, R.E. (2000). TRA-1 regulates transcription of *fog-3*, which controls  
1218 germ cell fate in *C. elegans*. Development 127, 3119-3129.
- 1219 Chen, Y.-C.A., Stuwe, E., Luo, Y., Ninova, M., Thomas, A.L., Rozhavskaia, E., Li, S.,  
1220 Vempati, S., Laver, J.D., Patel, D.J., et al. (2016). Cutoff suppresses RNA polymerase II  
1221 termination to ensure expression of piRNA precursors. Mol. Cell 63, 97-109.
- 1222 Clarke, N.D., and Berg, J.M. (1998). Zinc fingers in *Caenorhabditis elegans*: Finding  
1223 families and probing pathways. Science 282, 2018-2022.
- 1224 Cox, D.N., Chao, A., Baker, J., Chang, L., Qiao, D., and Lin, H. (1998). A novel class of  
1225 evolutionarily conserved genes defined by *piwi* are essential for stem cell self-renewal.  
1226 Genes Dev. 12, 3715-3727.



- 1227 Cunningham, F., Achuthan, P., Akanni, W., Allen, J., Amode, M.R., Armean, I.M.,  
1228 Bennett, R., Bhai, J., Billis, K., Boddu, S., et al. (2018). Ensembl 2019. *Nucleic Acids Res.*  
1229 *47*, D745-D751.
- 1230 Das, P.P., Bagijn, M.P., Goldstein, L.D., Woolford, J.R., Lehrbach, N.J., Sapetschnig, A.,  
1231 Buhecha, H.R., Gilchrist, M.J., Howe, K.L., Stark, R., et al. (2008). Piwi and piRNAs act  
1232 upstream of an endogenous siRNA pathway to suppress Tc3 transposon mobility in the  
1233 *Caenorhabditis elegans* germline. *Mol. Cell* *31*, 79-90.
- 1234 Deng, W., and Lin, H. (2002). *miwi*, a murine homolog of *piwi*, encodes a cytoplasmic  
1235 protein essential for spermatogenesis. *Dev. Cell* *2*, 819-830.
- 1236 Di Giacomo, M., Comazzetto, S., Saini, H., Fazio, S.D., Carrieri, C., Morgan, M.,  
1237 Vasiliauskaite, L., Benes, V., Enright, A.J., and O'Carroll, D. (2013). Multiple epigenetic  
1238 mechanisms and the piRNA pathway enforce LINE1 silencing during adult  
1239 spermatogenesis. *Mol. Cell* *50*, 601-608.
- 1240 Doniach, T., and Hodgkin, J. (1984). A sex-determining gene, *fem-1*, required for both  
1241 male and hermaphrodite development in *Caenorhabditis elegans*. *Dev. Biol.* *106*, 223-  
1242 235.
- 1243 Fahlgren, N., Sullivan, C.M., Kasschau, K.D., Chapman, E.J., Cumbie, J.S., Montgomery,  
1244 T.A., Gilbert, S.D., Dasenko, M., Backman, T.W.H., Givan, S.A., et al. (2009).  
1245 Computational and analytical framework for small RNA profiling by high-throughput  
1246 sequencing. *RNA* *15*, 992-1002.
- 1247 Gainetdinov, I., Colpan, C., Arif, A., Cecchini, K., and Zamore, P.D. (2018). A single  
1248 mechanism of biogenesis, initiated and directed by PIWI proteins, explains piRNA  
1249 production in most animals. *Mol. Cell* *71*, 775-790.
- 1250 Girard, A., Sachidanandam, R., Hannon, G.J., and Carmell, M.A. (2006). A germline-  
1251 specific class of small RNAs binds mammalian Piwi proteins. *Nature* *442*, 199-202.
- 1252 Goh, W.-S.S., Seah, J.W.E., Harrison, E.J., Chen, C., Hammell, C.M., and Hannon, G.J.  
1253 (2014). A genome-wide RNAi screen identifies factors required for distinct stages of *C.*  
1254 *elegans* piRNA biogenesis. *Genes Dev.* *28*, 797-807.
- 1255 Grivna, S.T., Beyret, E., Wang, Z., and Lin, H. (2006). A novel class of small RNAs in  
1256 mouse spermatogenic cells. *Genes Dev.* *20*, 1709-1714.
- 1257 Gu, W., Lee, H.-C., Chaves, D., Youngman, E.M., Pazour, G.J., Jr., D.C., and Mello, C.C.  
1258 (2012). CapSeq and CIP-TAP identify Pol II start sites and reveal capped small RNAs as  
1259 *C. elegans* piRNA precursors. *Cell* *151*, 1488-1500.
- 1260 Hammoud, S.S., Low, D.H.P., Yi, C., Carrell, D.T., Guccione, E., and Cairns, B.R. (2014).  
1261 Chromatin and transcription transitions of mammalian adult germline stem cells and  
1262 spermatogenesis. *Cell Stem Cell* *15*, 239-253.

- 1263 Harris, A.N., and Macdonald, P.M. (2001). *aubergine* encodes a *Drosophila* polar granule  
1264 component required for pole cell formation and related to eIF2C. *Development* *128*, 2823-  
1265 2832.
- 1266 He, L., Diedrich, J., Chu, Y.-Y., and Yates, J.R. (2015). Extracting accurate precursor  
1267 information for tandem mass spectra by RawConverter. *Anal. Chem.* *87*, 11361-11367.
- 1268 Henry, R.W., Sadowski, C.L., Kobayashi, R., and Hernandez, N. (1995). A TBP-TAF  
1269 complex required for transcription of human snRNA genes by RNA polymerases II and  
1270 III. *Nature* *374*, 653-656.
- 1271 Henry, R.W., Mittal, V., Ma, B., Kobayashi, R., and Hernandez, N. (1998). SNAP19  
1272 mediates the assembly of a functional core promoter complex (SNAPc) shared by RNA  
1273 polymerases II and III. *Genes Dev.* *12*, 2664-2672.
- 1274 Hodgkin, J. (1987). A genetic analysis of the sex-determining gene, *tra-1*, in the nematode  
1275 *Caenorhabditis elegans*. *Genes Dev.* *1*, 731-745.
- 1276 Hodgkin, J., Horvitz, H.R., and Brenner, S. (1979). Nondisjunction mutants of the  
1277 nematode *Caenorhabditis elegans*. *Genetics* *91*, 67-94.
- 1278 Hung, K.-H., and Stumph, W.E. (2010). Regulation of snRNA gene expression by the  
1279 *Drosophila melanogaster* small nuclear RNA activating protein complex (DmSNAPc).  
1280 *Crit. Rev. Biochem. Mol. Biol.* *46*, 11-26.
- 1281 Jawdekar, G.W., and Henry, R.W. (2008). Transcriptional regulation of human small  
1282 nuclear RNA genes. *Biochim. Biophys. Acta* *1779*, 295-305.
- 1283 Kamath, R.S., and Ahringer, J. (2003). Genome-wide RNAi screening in *Caenorhabditis*  
1284 *elegans*. *Methods* *30*, 313-321.
- 1285 Kaneshiro, K.R., Rechtsteiner, A., and Strome, S. (2019). Sperm-inherited H3K27me3  
1286 impacts offspring transcription and development in *C. elegans*. *Nat. Commun.* *10*, 1271.
- 1287 Kasper, D.M., Wang, G., Gardner, K.E., Johnstone, T.G., and Reinke, V. (2014). The *C.*  
1288 *elegans* SNAPc component SNPC-4 coats piRNA domains and is globally required for  
1289 piRNA abundance. *Dev. Cell* *31*, 145-158.
- 1290 Kato, M., Lencastre, A. de, Pincus, Z., and Slack, F.J. (2009). Dynamic expression of  
1291 small non-coding RNAs, including novel microRNAs and piRNAs/21U-RNAs, during  
1292 *Caenorhabditis elegans* development. *Genome Biol.* *10*, R54.
- 1293 Klattenhoff, C., Xi, H., Li, C., Lee, S., Xu, J., Khurana, J.S., Zhang, F., Schultz, N.,  
1294 Koppetsch, B.S., Nowosielska, A., et al. (2009). The *Drosophila* HP1 homolog Rhino is  
1295 required for transposon silencing and piRNA production by dual-strand clusters. *Cell* *138*,  
1296 1137-1149.

- 1297 Kuramochi-Miyagawa, S., Watanabe, T., Gotoh, K., Totoki, Y., Toyoda, A., Ikawa, M.,  
1298 Asada, N., Kojima, K., Yamaguchi, Y., Ijiri, T.W., et al. (2008). DNA methylation of  
1299 retrotransposon genes is regulated by Piwi family members MILI and MIWI2 in murine  
1300 fetal testes. *Genes Dev.* 22, 908-917.
- 1301 Lamont, L.B., and Kimble, J. (2007). Developmental expression of FOG-1/CPEB protein  
1302 and its control in the *Caenorhabditis elegans* hermaphrodite germ line. *Dev. Dynam.* 236,  
1303 871-879.
- 1304 Langmead, B., and Salzberg, S.L. (2012). Fast gapped-read alignment with Bowtie 2.  
1305 *Nat. Methods* 9, 357-359.
- 1306 Langmead, B., Trapnell, C., Pop, M., and Salzberg, S.L. (2009). Ultrafast and memory-  
1307 efficient alignment of short DNA sequences to the human genome. *Genome Biol.* 10,  
1308 R25.
- 1309 Levine, M., Cattoglio, C., and Tjian, R. (2014). Looping back to leap forward: transcription  
1310 enters a new era. *Cell* 157, 13-25.
- 1311 Li, C., Harding, G.A., Parise, J., McNamara-Schroeder, K.J., and Stumph, W.E. (2004).  
1312 Architectural arrangement of cloned proximal sequence element-binding protein subunits  
1313 on *Drosophila* U1 and U6 snRNA gene promoters. *Mol. Cell. Biol.* 24, 1897-1906.
- 1314 Li, H., Handsaker, B., Wysoker, A., Fennell, T., Ruan, J., Homer, N., Marth, G., Abecasis,  
1315 G., Durbin, R., and Subgroup, 1000 Genome Project Data Processing (2009). The  
1316 Sequence Alignment/Map format and SAMtools. *Bioinformatics* 25, 2078-2079.
- 1317 Li, X.Z., Roy, C.K., Dong, X., Bolcun-Filas, E., Wang, J., Han, B.W., Xu, J., Moore, M.J.,  
1318 Schimenti, J.C., Weng, Z., et al. (2013). An ancient transcription factor initiates the burst  
1319 of piRNA production during early meiosis in mouse testes. *Mol. Cell* 50, 67-81.
- 1320 Liao, Y., Smyth, G.K., and Shi, W. (2014). featureCounts: An efficient general-purpose  
1321 program for assigning sequence reads to genomic features. *Bioinformatics* 30, 923-930.
- 1322 Lin, H., and Spradling, A.C. (1997). A novel group of pumilio mutations affects the  
1323 asymmetric division of germline stem cells in the *Drosophila* ovary. *Development* 124,  
1324 2463-2476.
- 1325 Love, M.I., Huber, W., and Anders, S. (2014). Moderated estimation of fold change and  
1326 dispersion for RNA-seq data with DESeq2. *Genome Biol.* 15, 550.
- 1327 Ma, B., and Hernandez, N. (2002). Redundant cooperative interactions for assembly of a  
1328 human U6 transcription initiation complex. *Mol. Cell Biol.* 22, 8067-8078.
- 1329 McCullers, T.J., and Steiniger, M. (2017). Transposable elements in *Drosophila*. *Mob*  
1330 *Genet. Elements* 7, 1-18.

- 1331 Mittal, V., Ma, B., and Hernandez, N. (1999). SNAPc: a core promoter factor with a built-  
1332 in DNA-binding damper that is deactivated by the Oct-1 POU domain. *Genes Dev.* *13*,  
1333 1807-1821.
- 1334 Moissiard, G., Bischof, S., Husmann, D., Pastor, W.A., Hale, C.J., Yen, L., Stroud, H.,  
1335 Papikian, A., Vashisht, A.A., Wohlschlegel, J.A., et al. (2014). Transcriptional gene  
1336 silencing by *Arabidopsis microrchidia* homologues involves the formation of heteromers.  
1337 *Proc. Natl. Acad. Sci.* *111*, 7474-7479.
- 1338 Mohn, F., Sienski, G., Handler, D., and Brennecke, J. (2014). The rhino-deadlock-cutoff  
1339 complex licenses noncanonical transcription of dual-strand piRNA clusters in *Drosophila*.  
1340 *Cell* *157*, 1364-1379.
- 1341 Murchison, E.P., Stein, P., Xuan, Z., Pan, H., Zhang, M.Q., Schultz, R.M., and Hannon,  
1342 G.J. (2007). Critical roles for Dicer in the female germline. *Genes Dev.* *21*, 682-693.
- 1343 Ozata, D.M., Gainetdinov, I., Zoch, A., O'Carroll, D., and Zamore, P.D. (2019). PIWI-  
1344 interacting RNAs: small RNAs with big functions. *Nat. Rev. Genet.* *20*, 89-108.
- 1345 Paix, A., Folkmann, A., Rasoloson, D., and Seydoux, G. (2015). High efficiency,  
1346 homology-directed genome editing in *Caenorhabditis elegans* using CRISPR-Cas9  
1347 ribonucleoprotein complexes. *Genetics* *201*, 47-54.
- 1348 Pane, A., Jiang, P., Zhao, D.Y., Singh, M., and Schüpbach, T. (2011). The Cutoff protein  
1349 regulates piRNA cluster expression and piRNA production in the *Drosophila* germline.  
1350 *EMBO J.* *30*, 4601-4615.
- 1351 Peng, J., Elias, J.E., Thoreen, C.C., Licklider, L.J., and Gygi, S.P. (2003). Evaluation of  
1352 multidimensional chromatography coupled with tandem mass spectrometry  
1353 (LC/LC-MS/MS) for large-scale protein analysis: The yeast proteome. *J. Proteome Res.*  
1354 *2*, 43-50.
- 1355 Pires-daSilva, A., and Sommer R.J., (2004). Conservation of the global sex determination  
1356 gene *tra-1* in distantly related nematodes. *Genes Dev.* *18*, 1198-1208.
- 1357 Ramírez, F., Ryan, D.P., Grüning, B., Bhardwaj, V., Kilpert, F., Richter, A.S., Heyne, S.,  
1358 Dündar, F., and Manke, T. (2016). DeepTools2: A next generation web server for deep-  
1359 sequencing data analysis. *Nucleic Acids Res.* *44*, W160-W165.
- 1360 Ruby, J.G., Jan, C., Player, C., Axtell, M.J., Lee, W., Nusbaum, C., Ge, H., and Bartel,  
1361 D.P. (2006). Large-scale sequencing reveals 21U-RNAs and additional microRNAs and  
1362 endogenous siRNAs in *C. elegans*. *Cell* *127*, 1193-1207.
- 1363 Shakes, D.C., and Ward, S. (1989). Initiation of spermiogenesis in *C. elegans*: A  
1364 pharmacological and genetic analysis. *Dev. Biol.* *134*, 189-200.

- 1365 Shen, E.-Z., Chen, H., Ozturk, A.R., Tu, S., Shirayama, M., Tang, W., Ding, Y.-H., Dai,  
1366 S.-Y., Weng, Z., and Mello, C.C. (2018). Identification of piRNA binding sites reveals the  
1367 Argonaute regulatory landscape of the *C. elegans* germline. *Cell* *172*, 937-951.
- 1368 Shirayama, M., Seth, M., Lee, H.-C., Gu, W., Ishidate, T., Conte, D., and Mello, C.C.  
1369 (2012). piRNAs initiate an epigenetic memory of nonself RNA in the *C. elegans* germline.  
1370 *Cell* *150*, 65-77.
- 1371 Stein, L., Sternberg, P., Durbin, R., Thierry-Mieg, J., and Spieth, J. (2001). WormBase:  
1372 network access to the genome and biology of *Caenorhabditis elegans*. *Nucleic Acids Res.*  
1373 *29*, 82-86.
- 1374 Su, Y., Song, Y., Wang, Y., Jessop, L., Zhan, L., and Stumph, W.E. (1997).  
1375 Characterization of a *Drosophila* proximal-sequence-element-binding protein involved in  
1376 transcription of small nuclear RNA genes. *Eur. J. Biochem.* *248*, 231-237.
- 1377 Tabb, D.L., McDonald, W.H., and Yates, J.R. (2002). DTASelect and Contrast: Tools for  
1378 assembling and comparing protein identifications from shotgun proteomics. *J. Proteome*  
1379 *Res.* *1*, 21-26.
- 1380 Tabuchi, T.M., Rechtsteiner, A., Jeffers, T.E., Egelhofer, T.A., Murphy, C.T., and Strome,  
1381 S. (2018). *Caenorhabditis elegans* sperm carry a histone-based epigenetic memory of  
1382 both spermatogenesis and oogenesis. *Nat. Commun.* *9*, 4310.
- 1383 Xu, Tao. (2006). ProLuCID, a fast and sensitive tandem mass spectra-based protein  
1384 identification program. *Mol. Cell. Proteomics* *5*, S174-S174.
- 1385 Timmons, L., and Fire, A. (1998). Specific interference by ingested dsRNA. *Nature* *395*,  
1386 854-854.
- 1387 Vagin, V.V., Sigova, A., Li, C., Seitz, H., Gvozdev, V., and Zamore, P.D. (2006). A distinct  
1388 small RNA pathway silences selfish genetic elements in the germline. *Science* *313*, 320-  
1389 324.
- 1390 Wang, G., and Reinke, V. (2008). A *C. elegans* Piwi, PRG-1, regulates 21U-RNAs during  
1391 spermatogenesis. *Curr. Biol.* *18*, 861-867.
- 1392 Weick, E.-M., Sarkies, P., Silva, N., Chen, R.A., Moss, S.M.M., Cording, A.C., Ahringer,  
1393 J., Martinez-Perez, E., and Miska, E.A. (2014). PRDE-1 is a nuclear factor essential for  
1394 the biogenesis of Ruby motif-dependent piRNAs in *C. elegans*. *Genes Dev.* *28*, 783-796.
- 1395 Weiser, N.E., Yang, D.X., Feng, S., Kalinava, N., Brown, K.C., Khanikar, J., Freeberg,  
1396 M.A., Snyder, M.J., Csankovszki, G., Chan, R.C., et al. (2017). MORC-1 integrates  
1397 nuclear RNAi and transgenerational chromatin architecture to promote germline  
1398 immortality. *Dev. Cell* *41*, 408-423.e7.

- 1399 Weng, C., Kosalka, J., Berkyurek, A.C., Stempor, P., Feng, X., Mao, H., Zeng, C., Li, W.-  
1400 J., Yan, Y.-H., Dong, M.-Q., et al. (2018). The USTC co-opts an ancient machinery to  
1401 drive piRNA transcription in *C. elegans*. *Genes Dev.* 33, 90-102.
- 1402 Williams, Z., Morozov, P., Mihailovic, A., Lin, C., Puvvula, P.K., Juranek, S., Rosenwaks,  
1403 Z., and Tuschl, T. (2015). Discovery and characterization of piRNAs in the human fetal  
1404 ovary. *Cell Rep.* 13, 854-863.
- 1405 Wolters, D.A., Washburn, M.P., and Yates, J.R. (2001). An automated multidimensional  
1406 protein identification technology for shotgun proteomics. *Anal. Chem.* 73, 5683-5690.
- 1407 Wong, M.W., Henry, R.W., Ma, B., Kobayashi, R., Klages, N., Matthias, P., Strubin, M.,  
1408 and Hernandez, N. (1998). The large subunit of basal transcription factor SNAPc is a Myb  
1409 domain protein that interacts with Oct-1. *Mol. Cell Biol.* 18, 368-377.
- 1410 Yang, Q., Hua, J., Wang, L., Xu, B., Zhang, H., Ye, N., Zhang, Z., Yu, D., Cooke, H.J.,  
1411 Zhang, Y., et al. (2013). MicroRNA and piRNA profiles in normal human testis detected  
1412 by next generation sequencing. *PLoS ONE* 8, e66809.
- 1413 Yoon, J.B., Murphy, S., Bai, L., Wang, Z., and Roeder, R.G. (1995). Proximal sequence  
1414 element-binding transcription factor (PTF) is a multisubunit complex required for  
1415 transcription of both RNA polymerase II- and RNA polymerase III-dependent small  
1416 nuclear RNA genes. *Mol. Cell Biol.* 15, 2019-2027.
- 1417 Zanin, E., Dumont, J., Gassmann, R., Cheeseman, I., Maddox, P., Bahmanyar, S.,  
1418 Carvalho, A., Niessen, S., Yates, J.R., Oegema, K., et al. (2011). Affinity purification of  
1419 protein complexes in *C. elegans*. *Methods Cell Biol.* 106, 289-322.
- 1420 Zarkower, D., and Hodgkin, J. (1993). Zinc fingers in sex determination: only one of the  
1421 two *C. elegans* Tra-1 proteins binds DNA *in vitro*. *Nucleic Acids Res.* 21, 3691-3698.
- 1422 Zhang, D., Tu, S., Stubna, M., Wu, W.-S., Huang, W.-C., Weng, Z., and Lee, H.-C. (2018).  
1423 The piRNA targeting rules and the resistance to piRNA silencing in endogenous genes.  
1424 *Science* 359, 587-592.
- 1425 Zhang, L., Ward, J.D., Cheng, Z., and Dernburg, A.F. (2015a). The auxin-inducible  
1426 degradation (AID) system enables versatile conditional protein depletion in *C. elegans*.  
1427 *Development* 142, 4374-4384.
- 1428 Zhang, P., Kang, J.-Y., Gou, L.-T., Wang, J., Xue, Y., Skogerboe, G., Dai, P., Huang, D.-  
1429 W., Chen, R., Fu, X.-D., et al. (2015b). MIWI and piRNA-mediated cleavage of messenger  
1430 RNAs in mouse testes. *Cell Res.* 25, 193-207.
- 1431 Zhang, Y., Liu, T., Meyer, C.A., Eeckhoute, J., Johnson, D.S., Bernstein, B.E., Nusbaum,  
1432 C., Myers, R.M., Brown, M., Li, W., et al. (2008). Model-based analysis of ChIP-Seq  
1433 (MACS). *Genome Biol.* 9, R137.

1434 Zhou, X., Zuo, Z., Zhou, F., Zhao, W., Sakaguchi, Y., Suzuki, T., Suzuki, T., Cheng, H.,  
1435 and Zhou, R. (2010). Profiling sex-specific piRNAs in zebrafish. *Genetics* 186, 1175-1185.

1436

1437

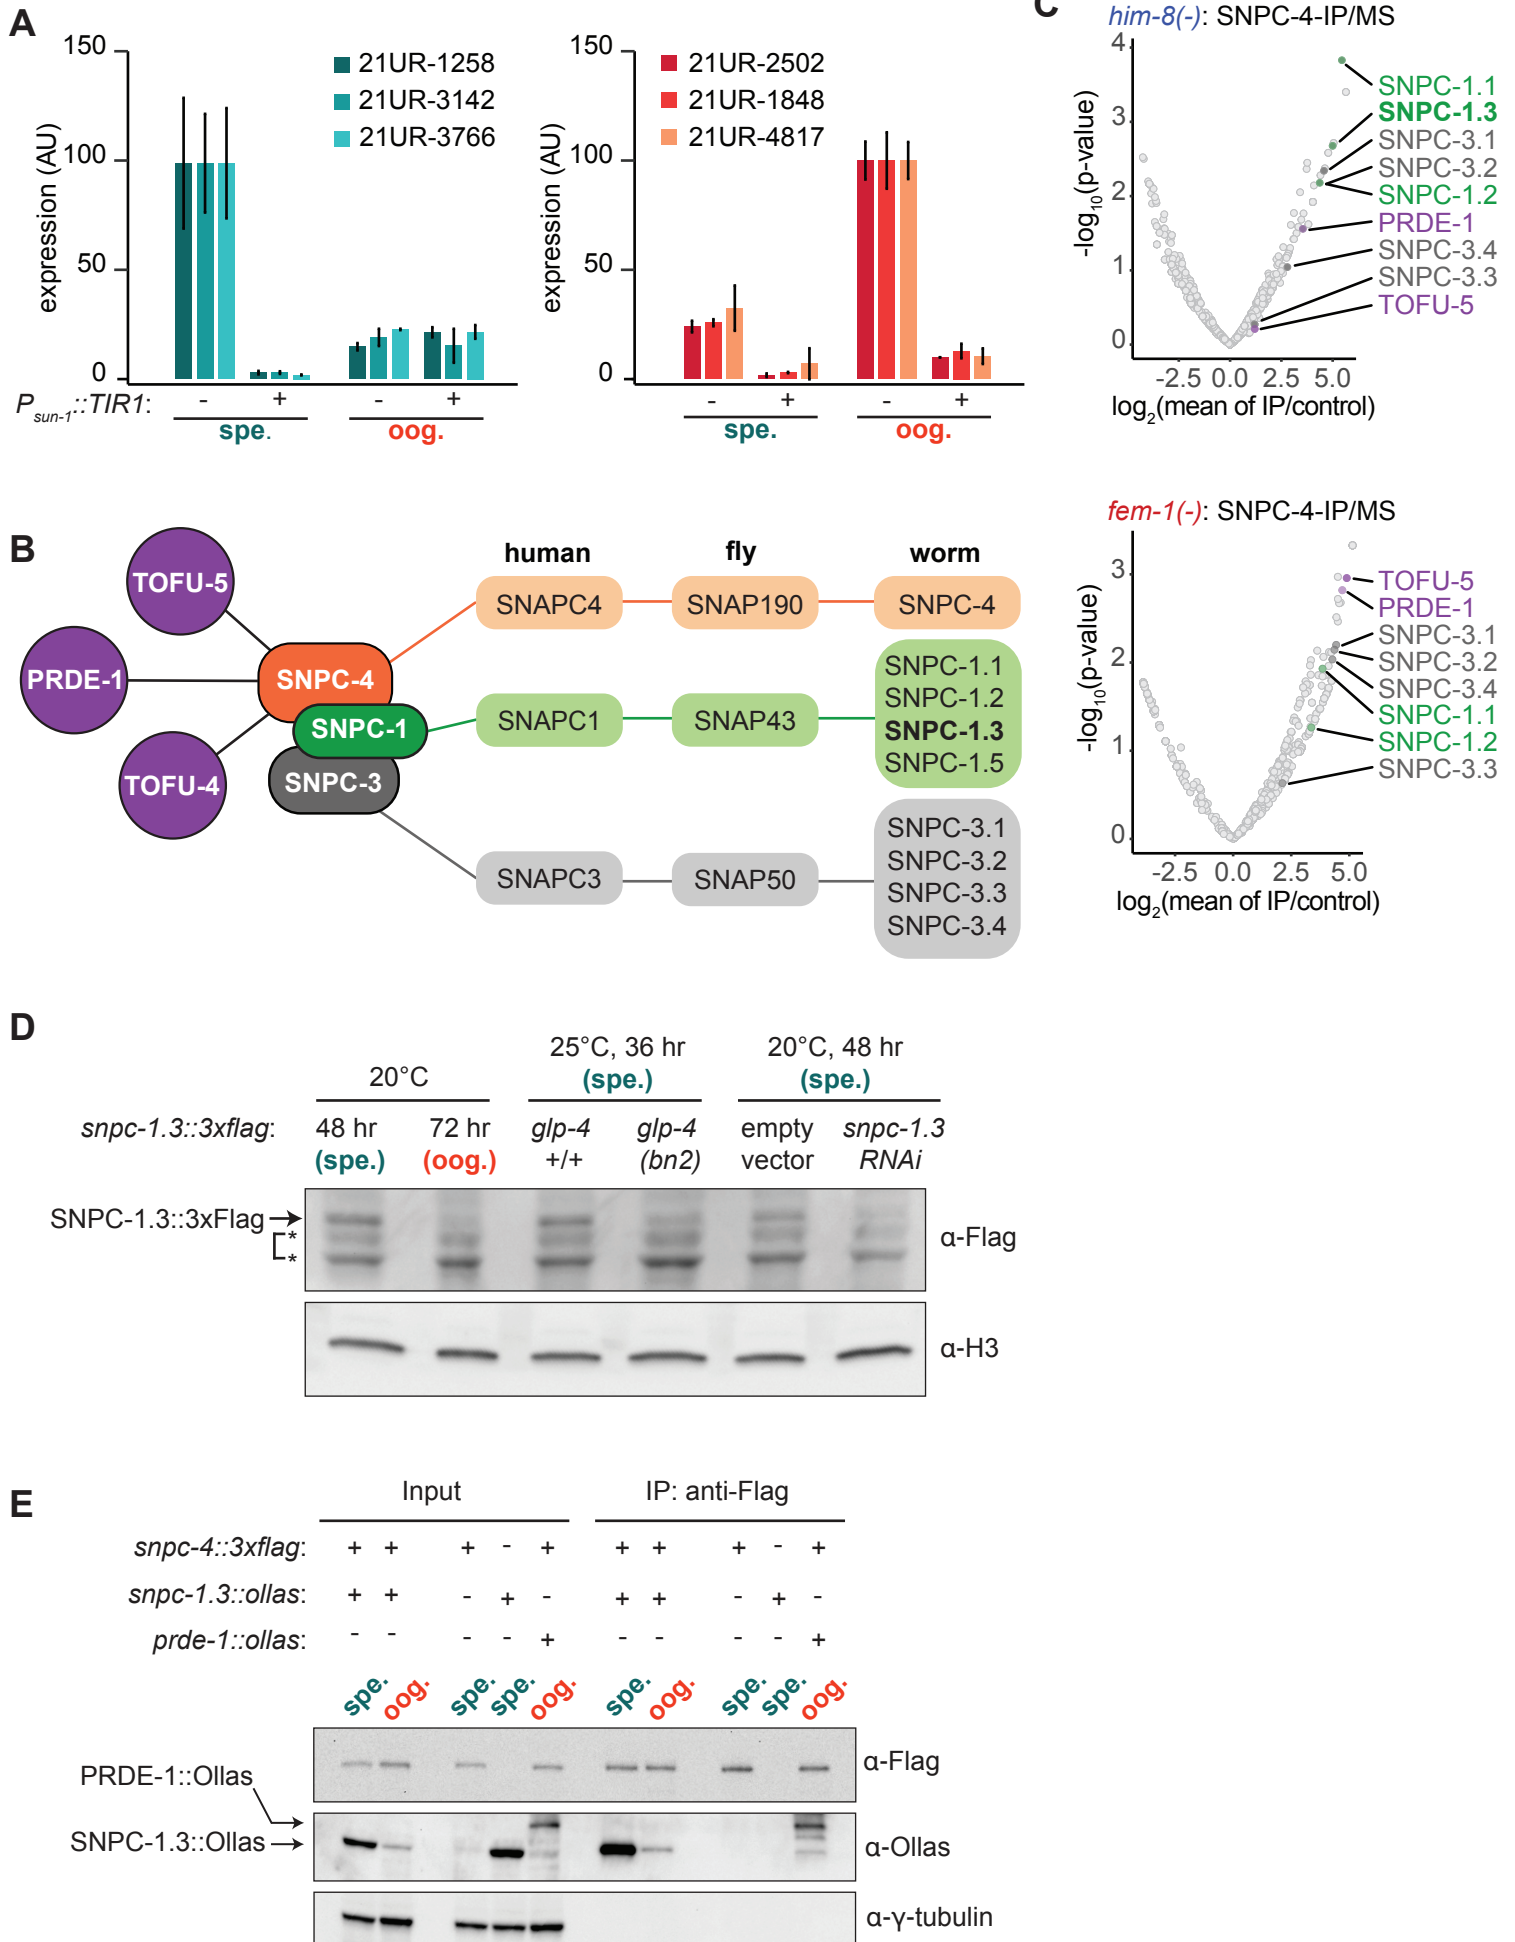



## Figure 2

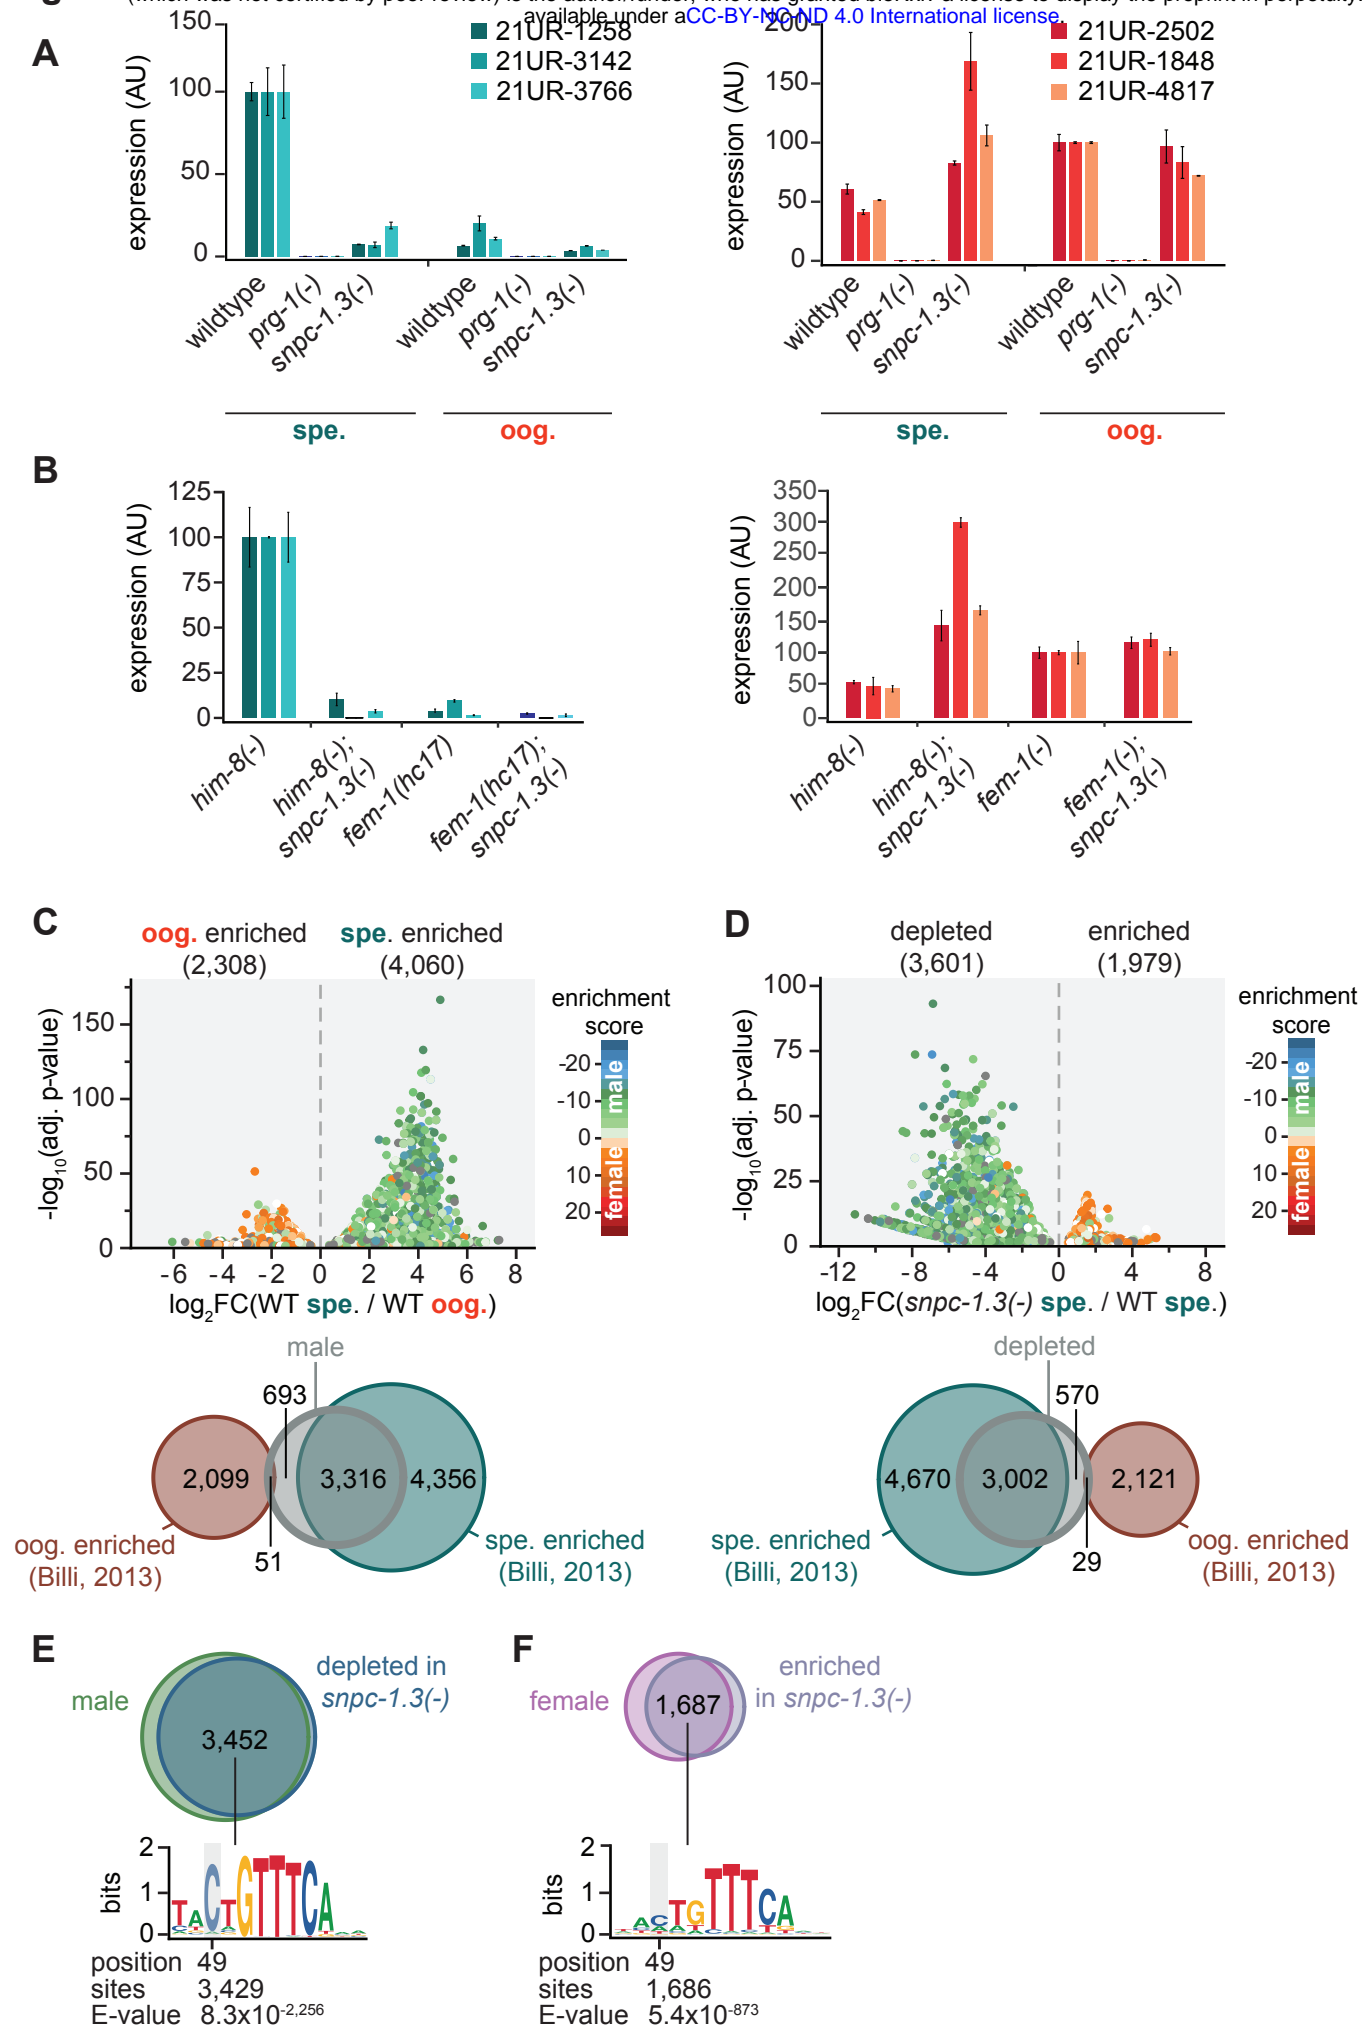

### Figure 3

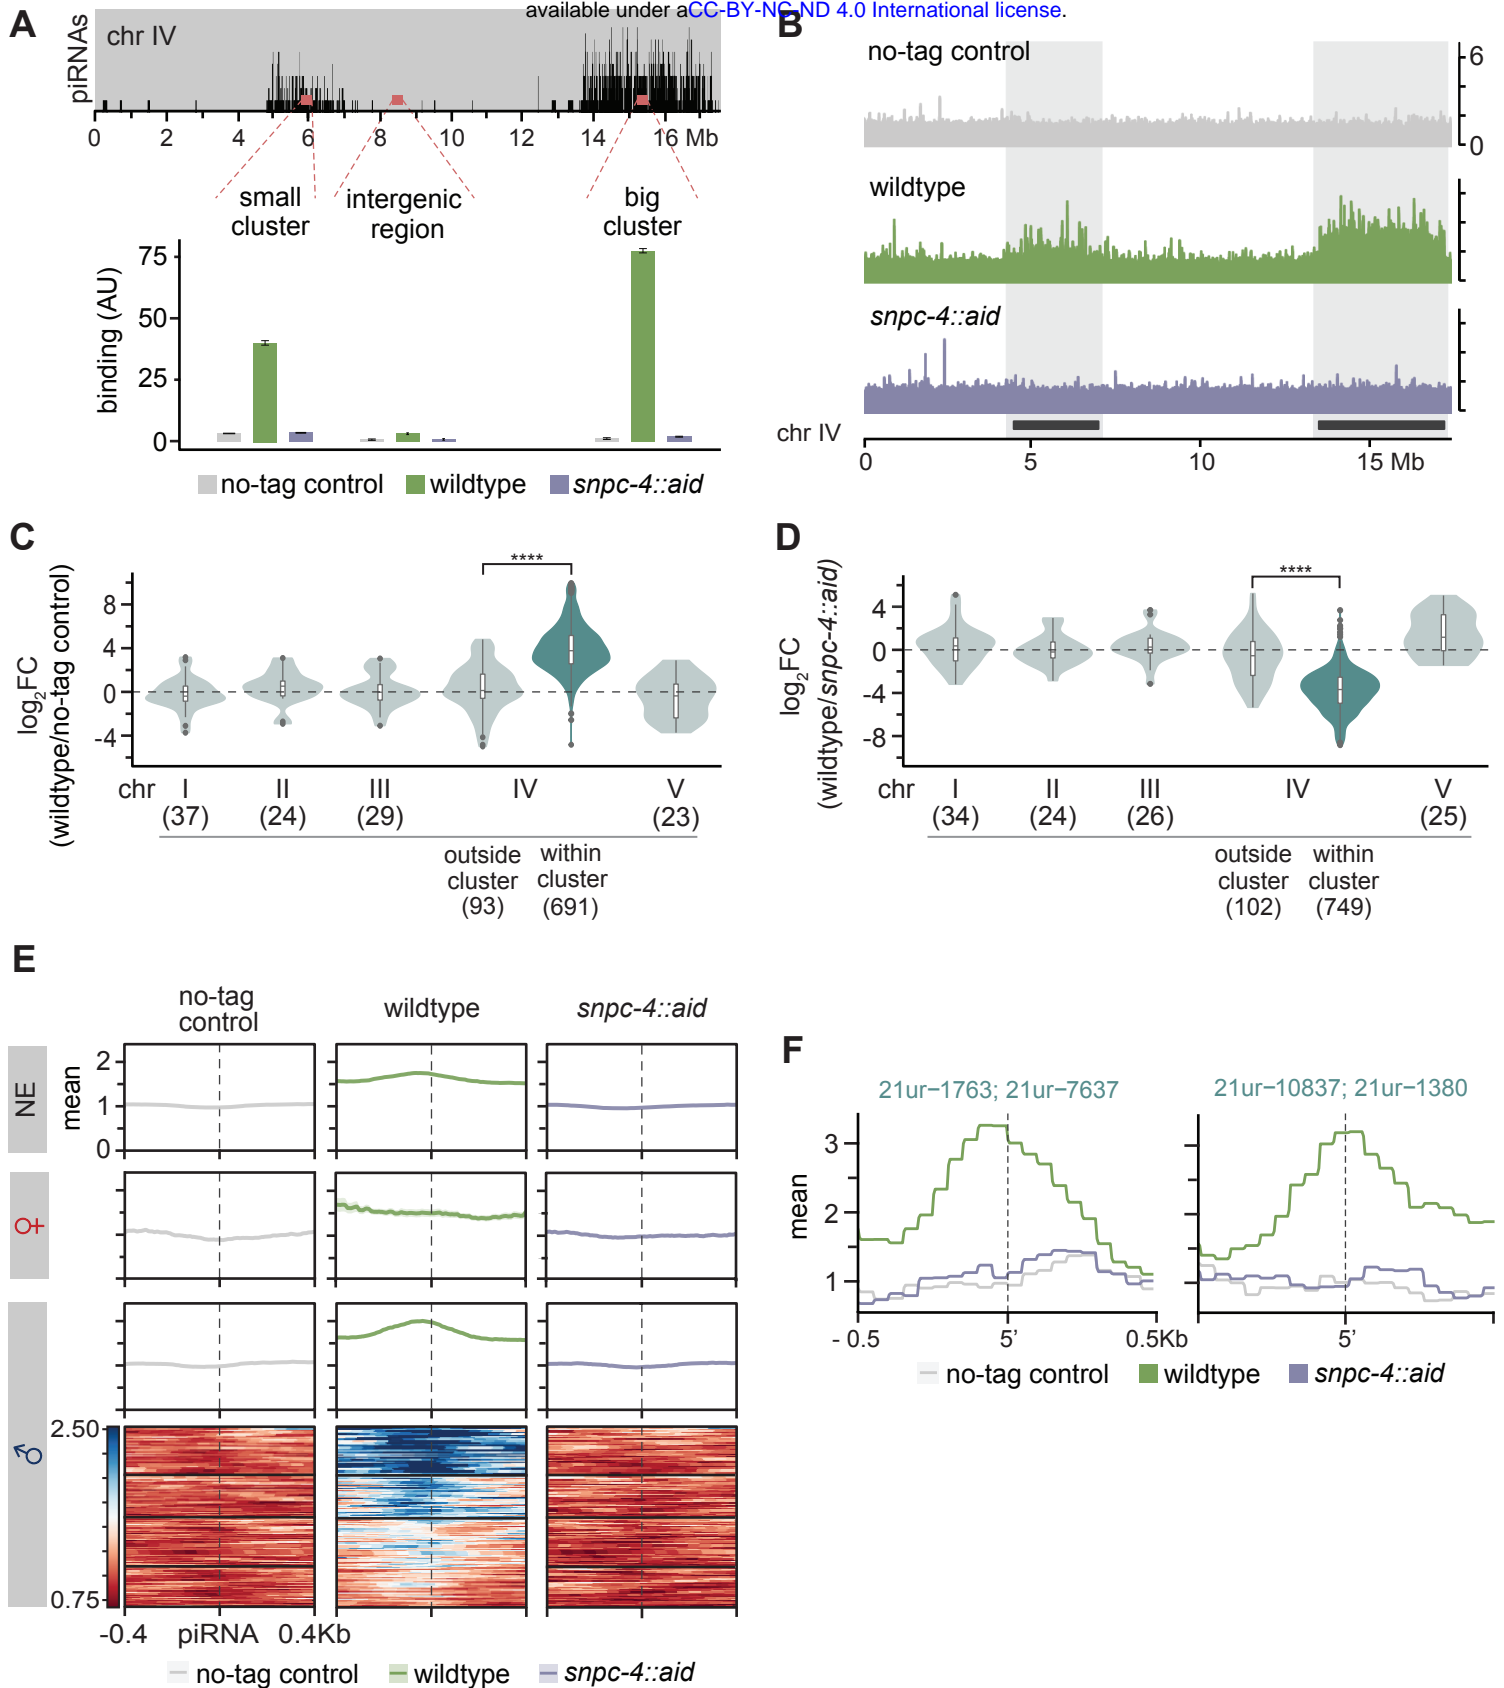

## Figure 4

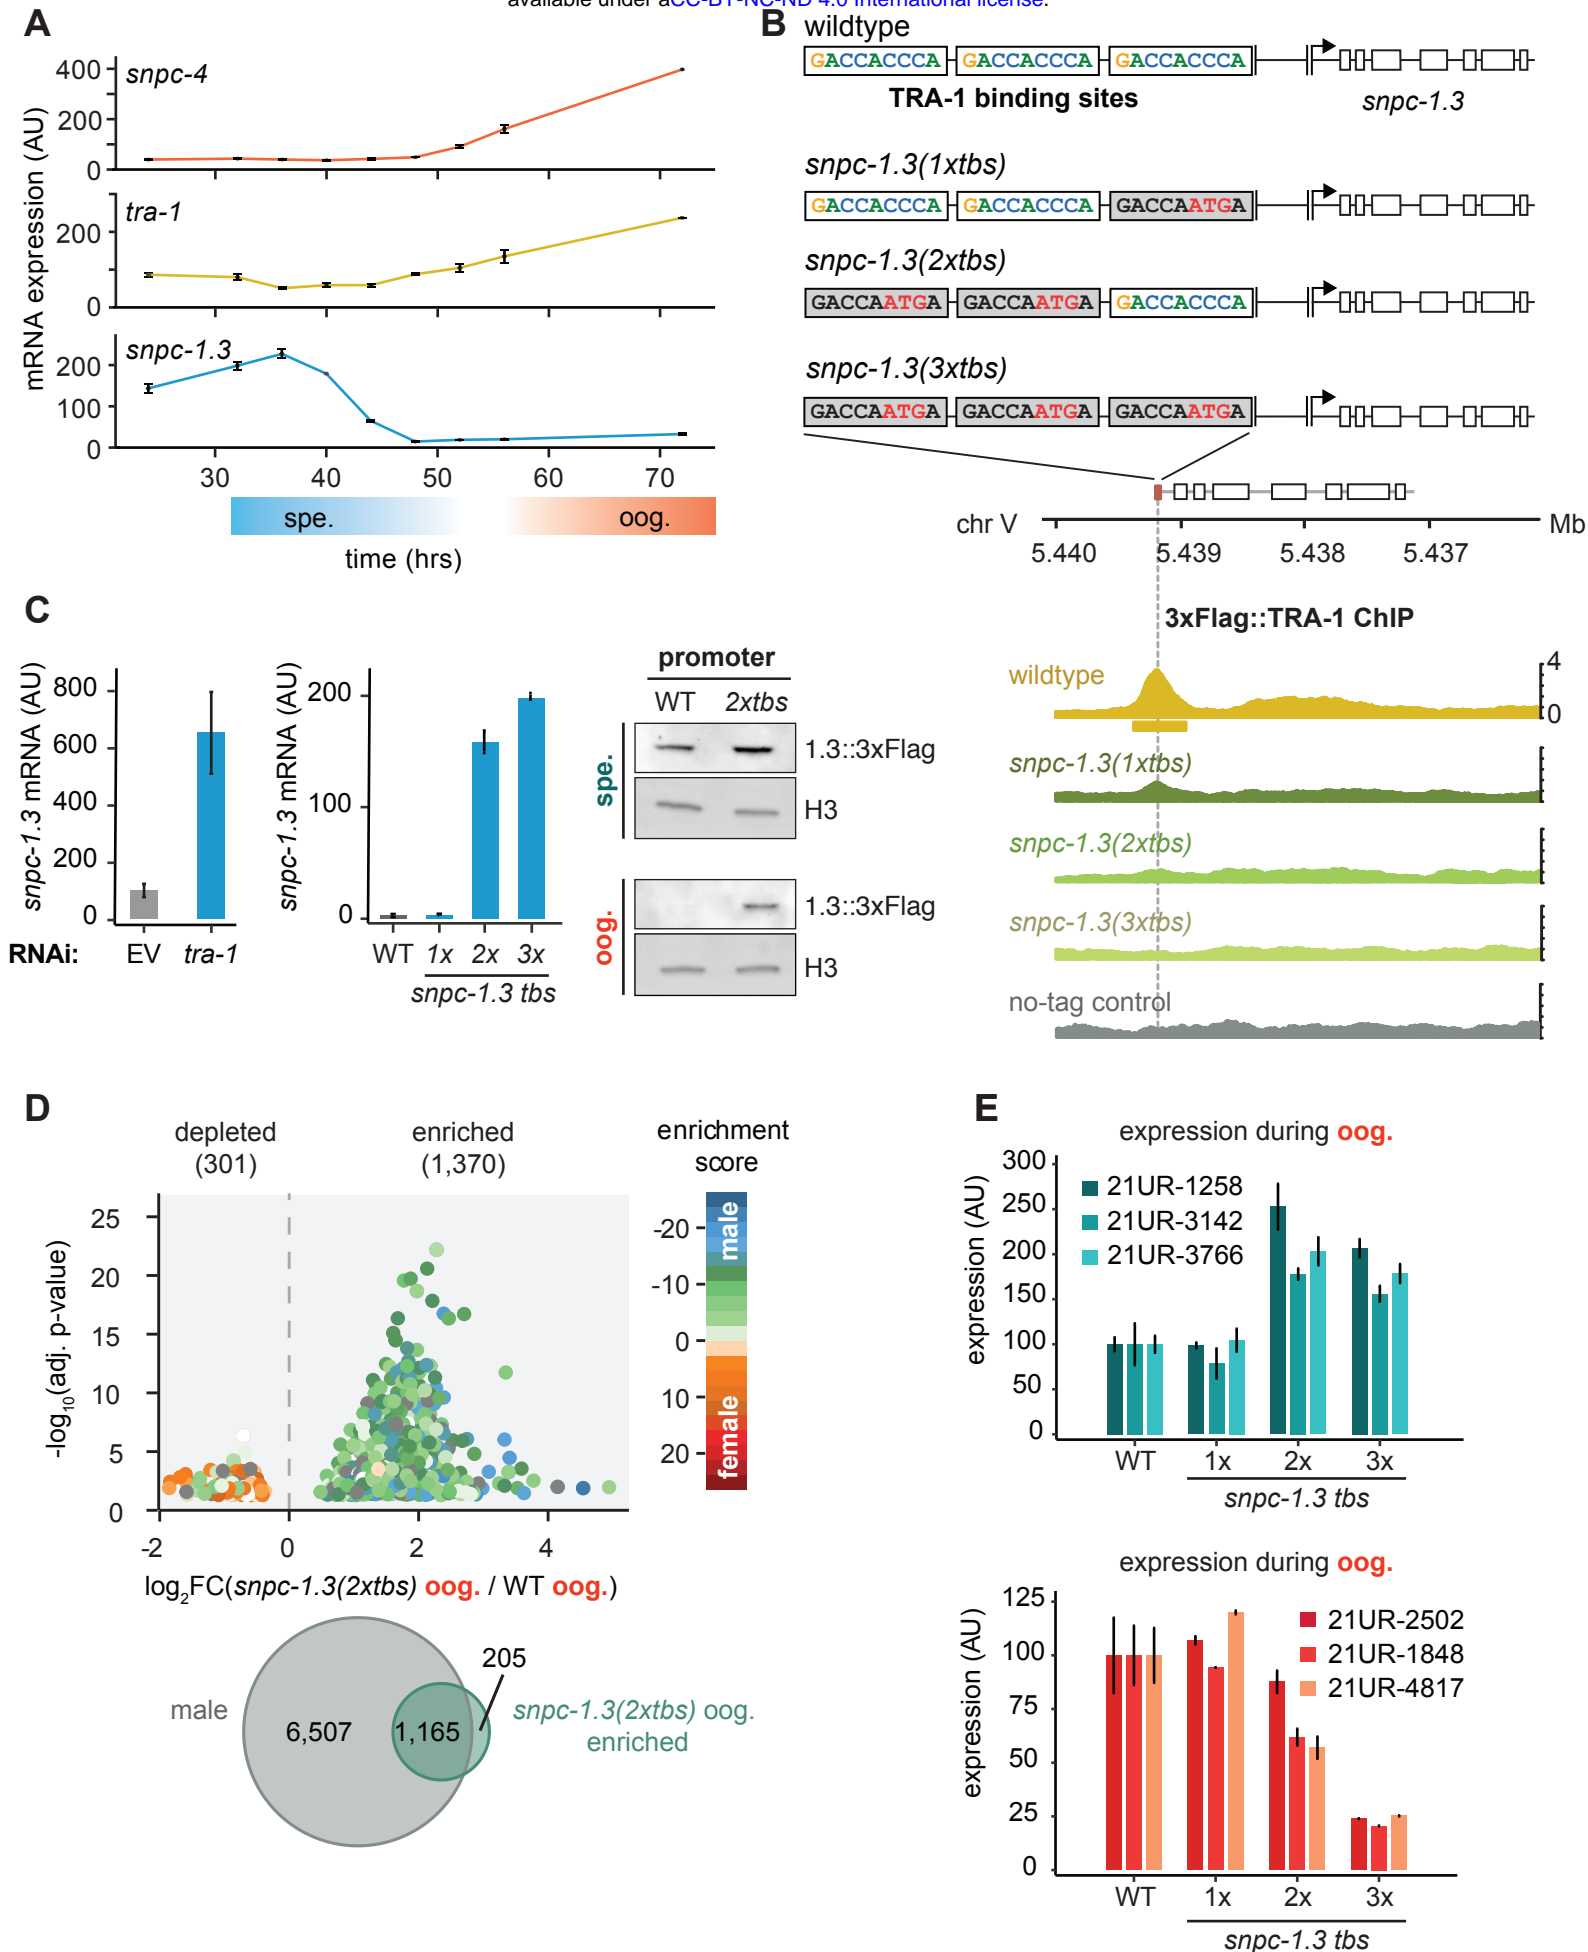

## Figure 5

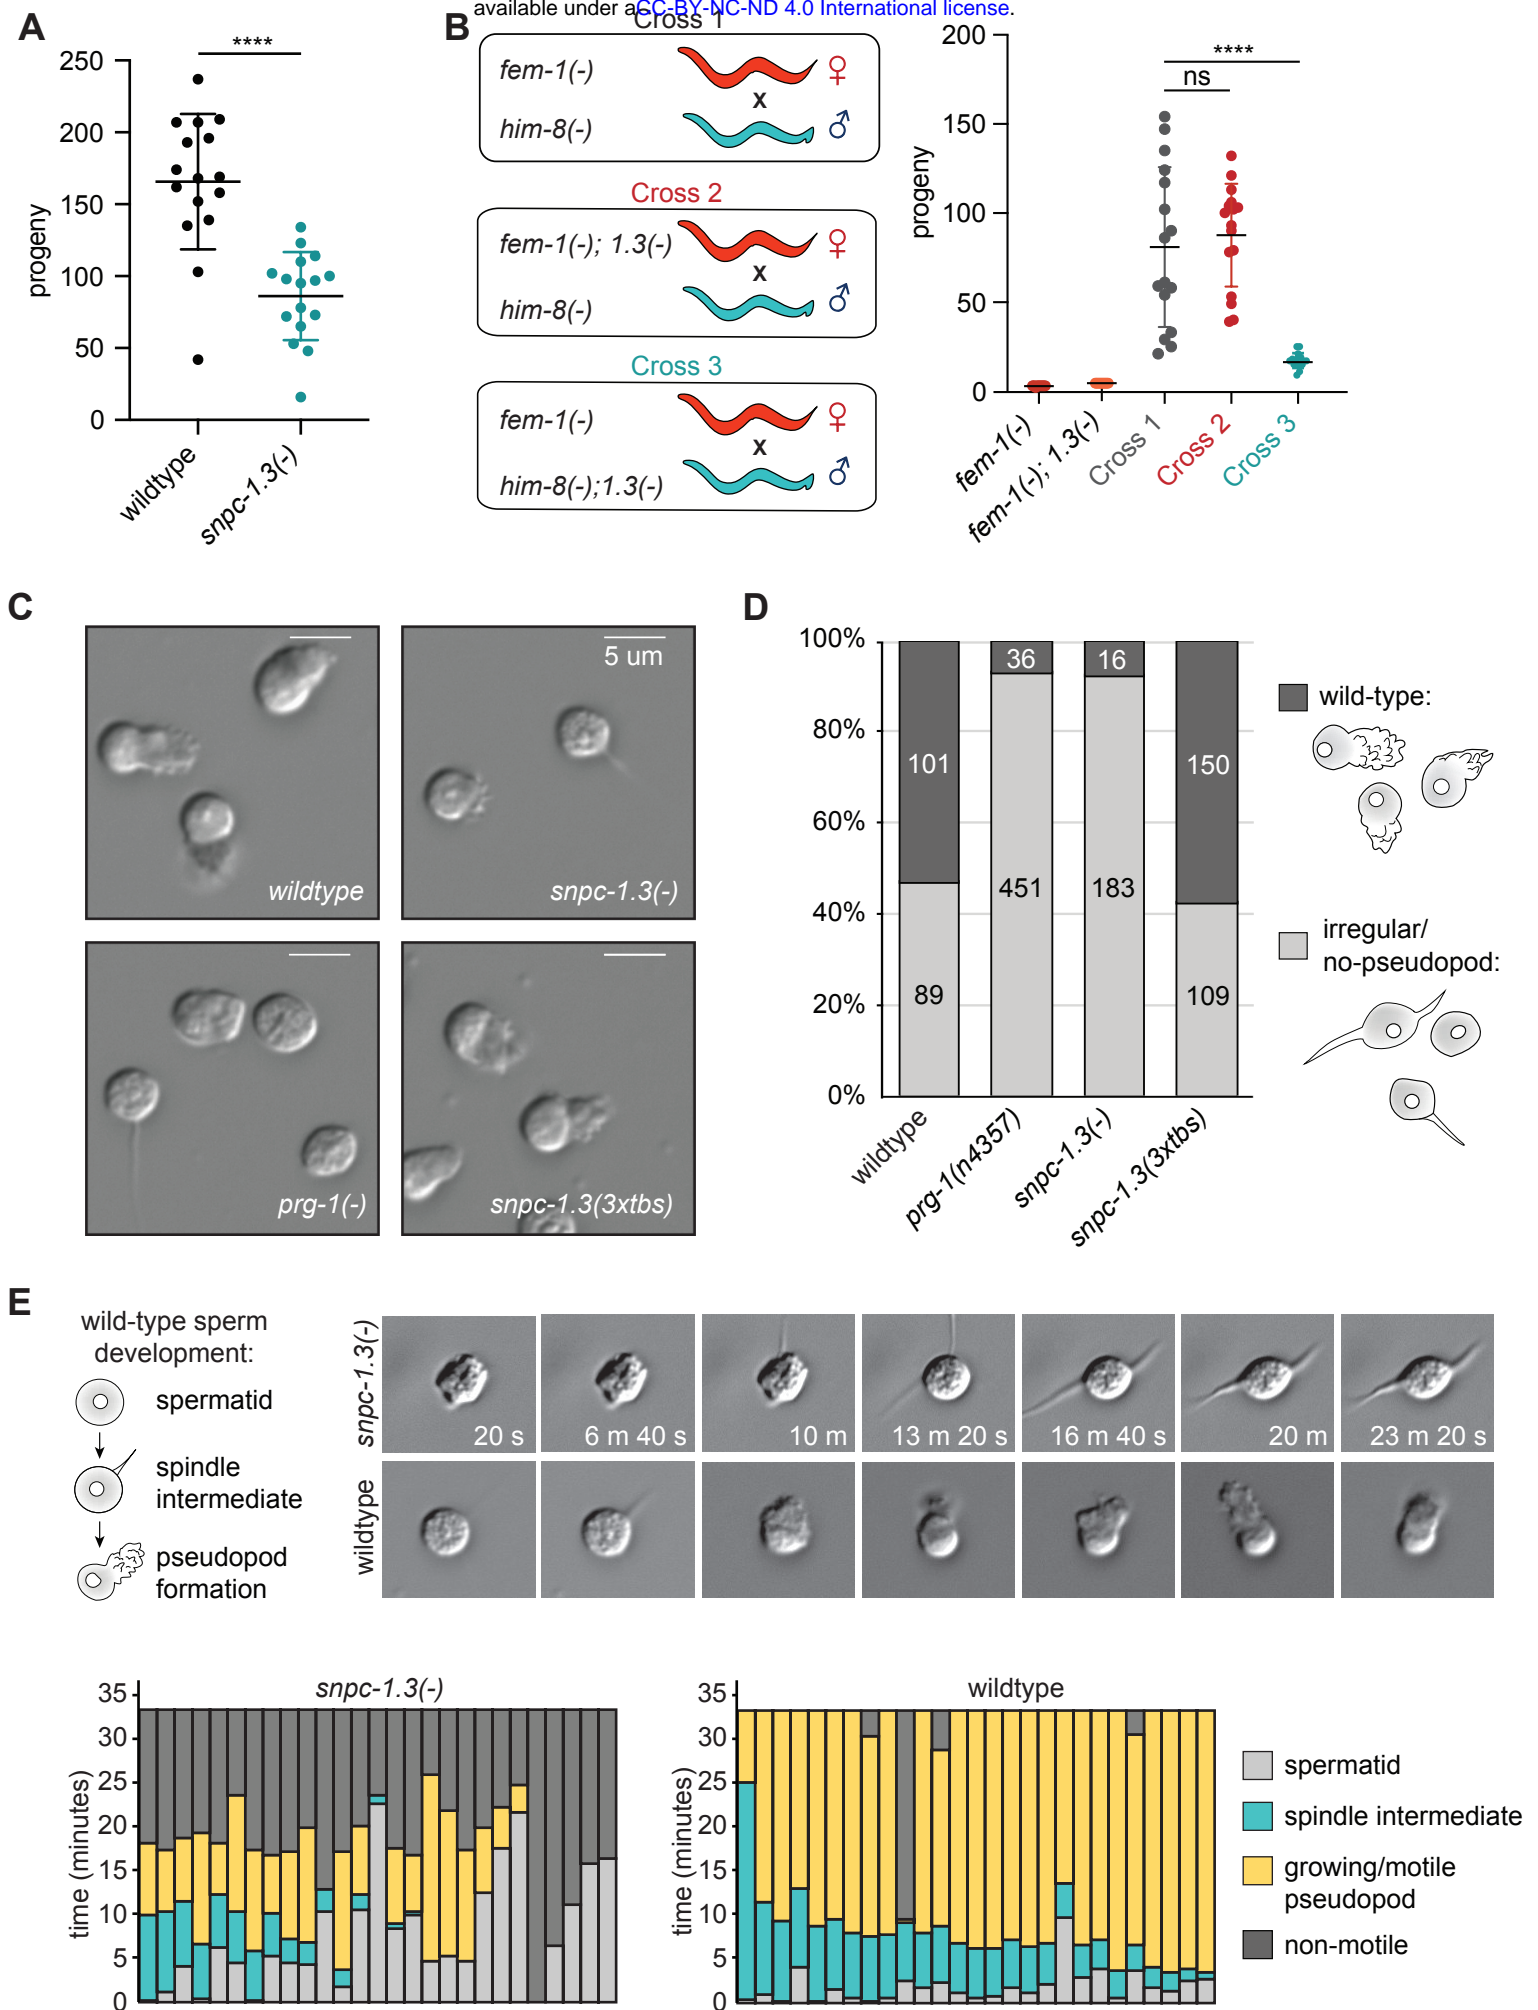

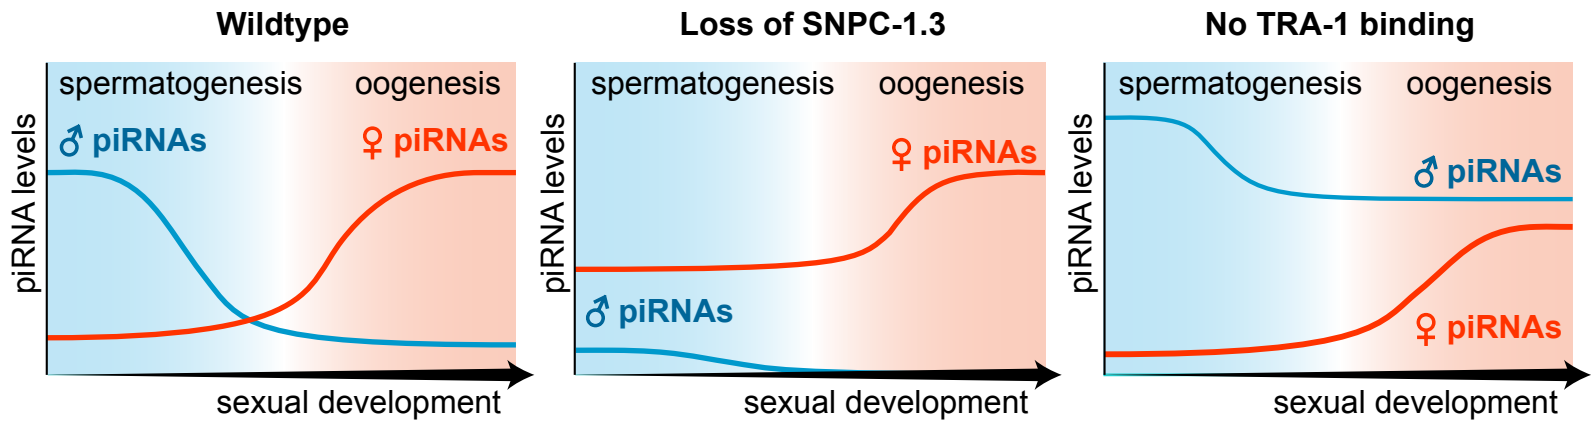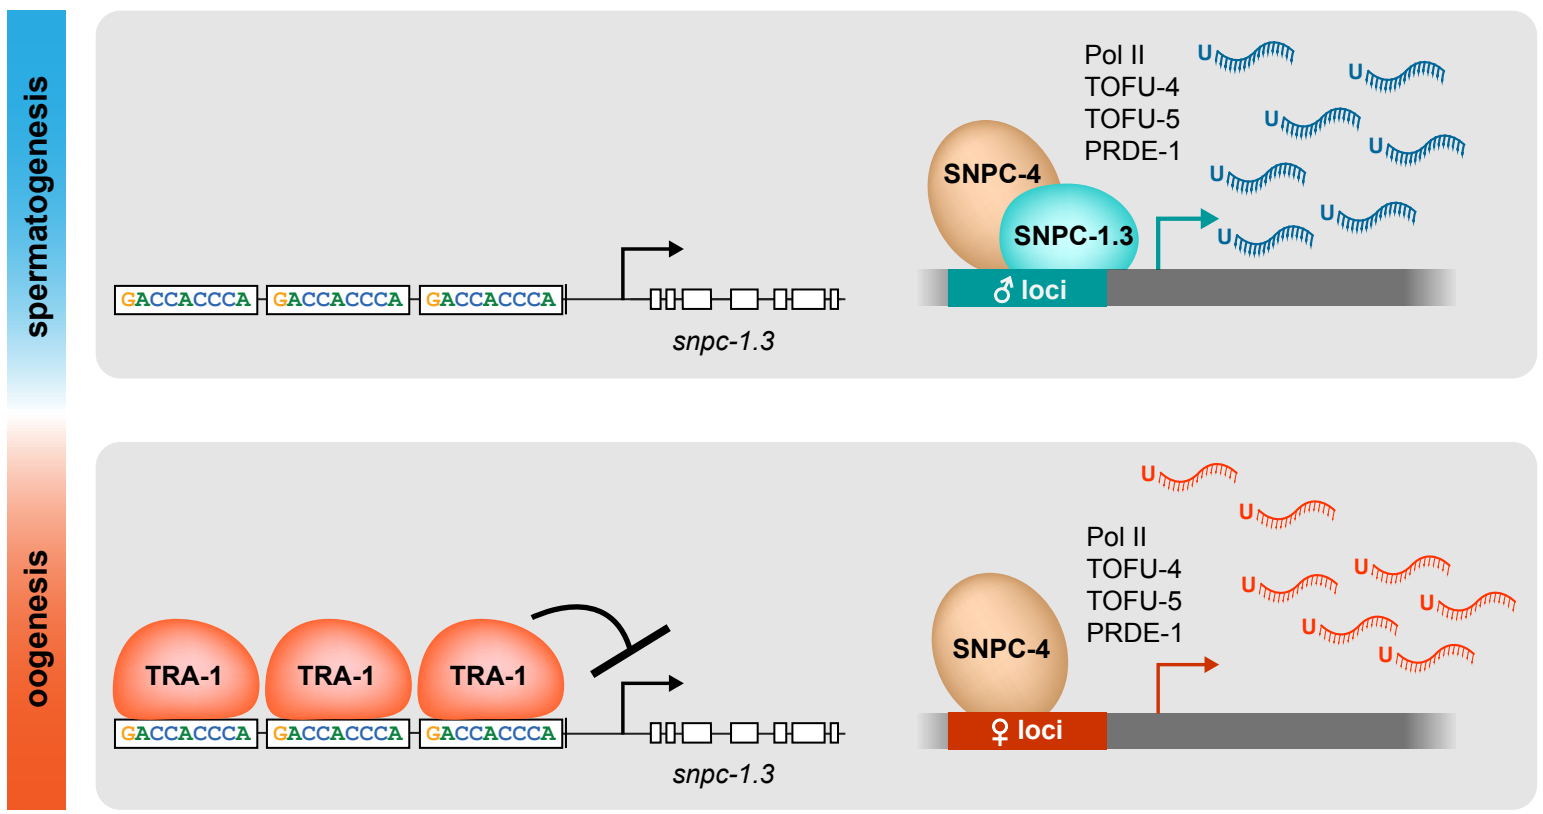

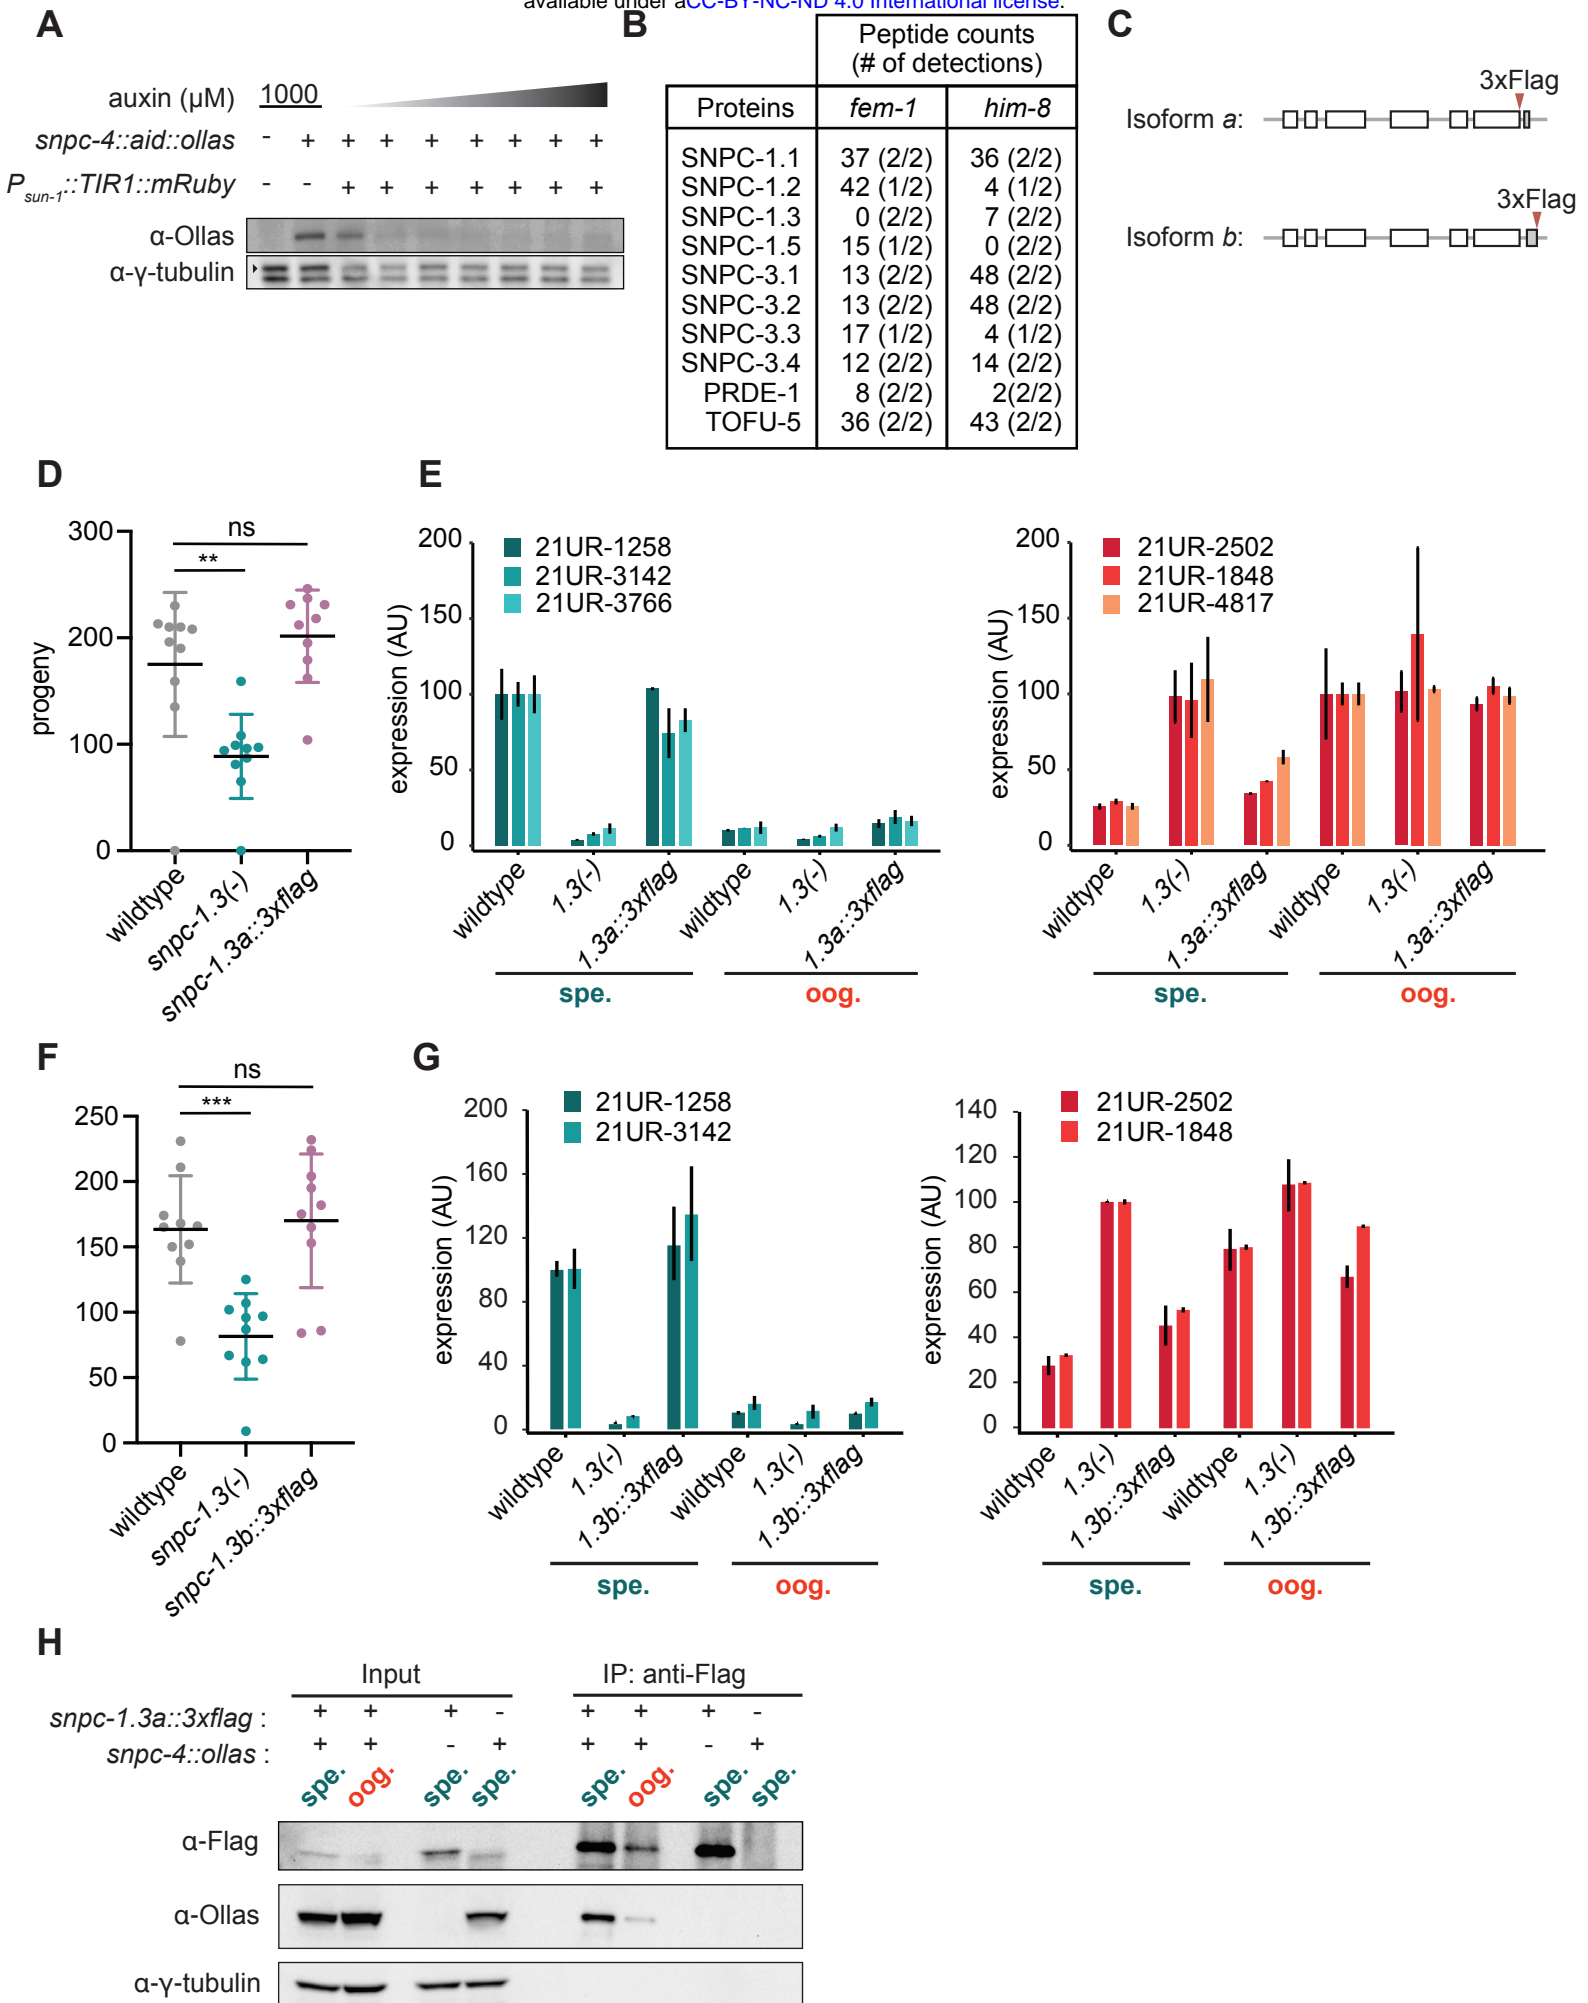

a

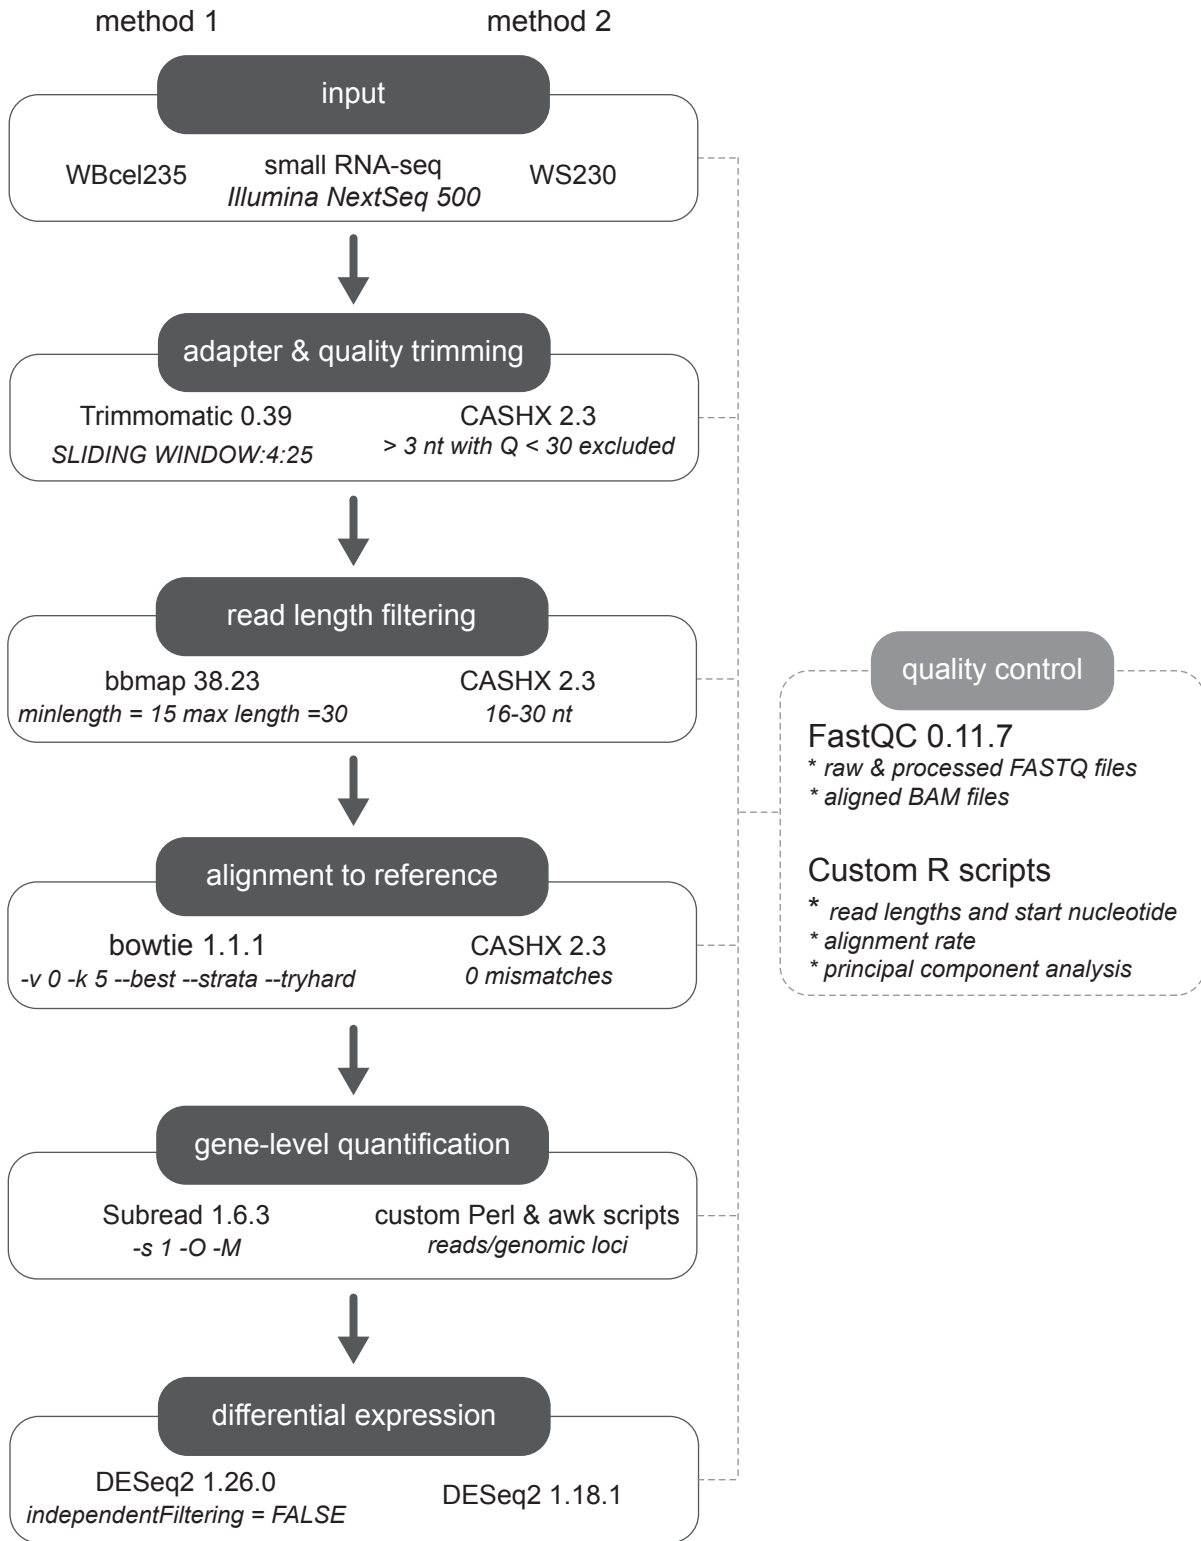

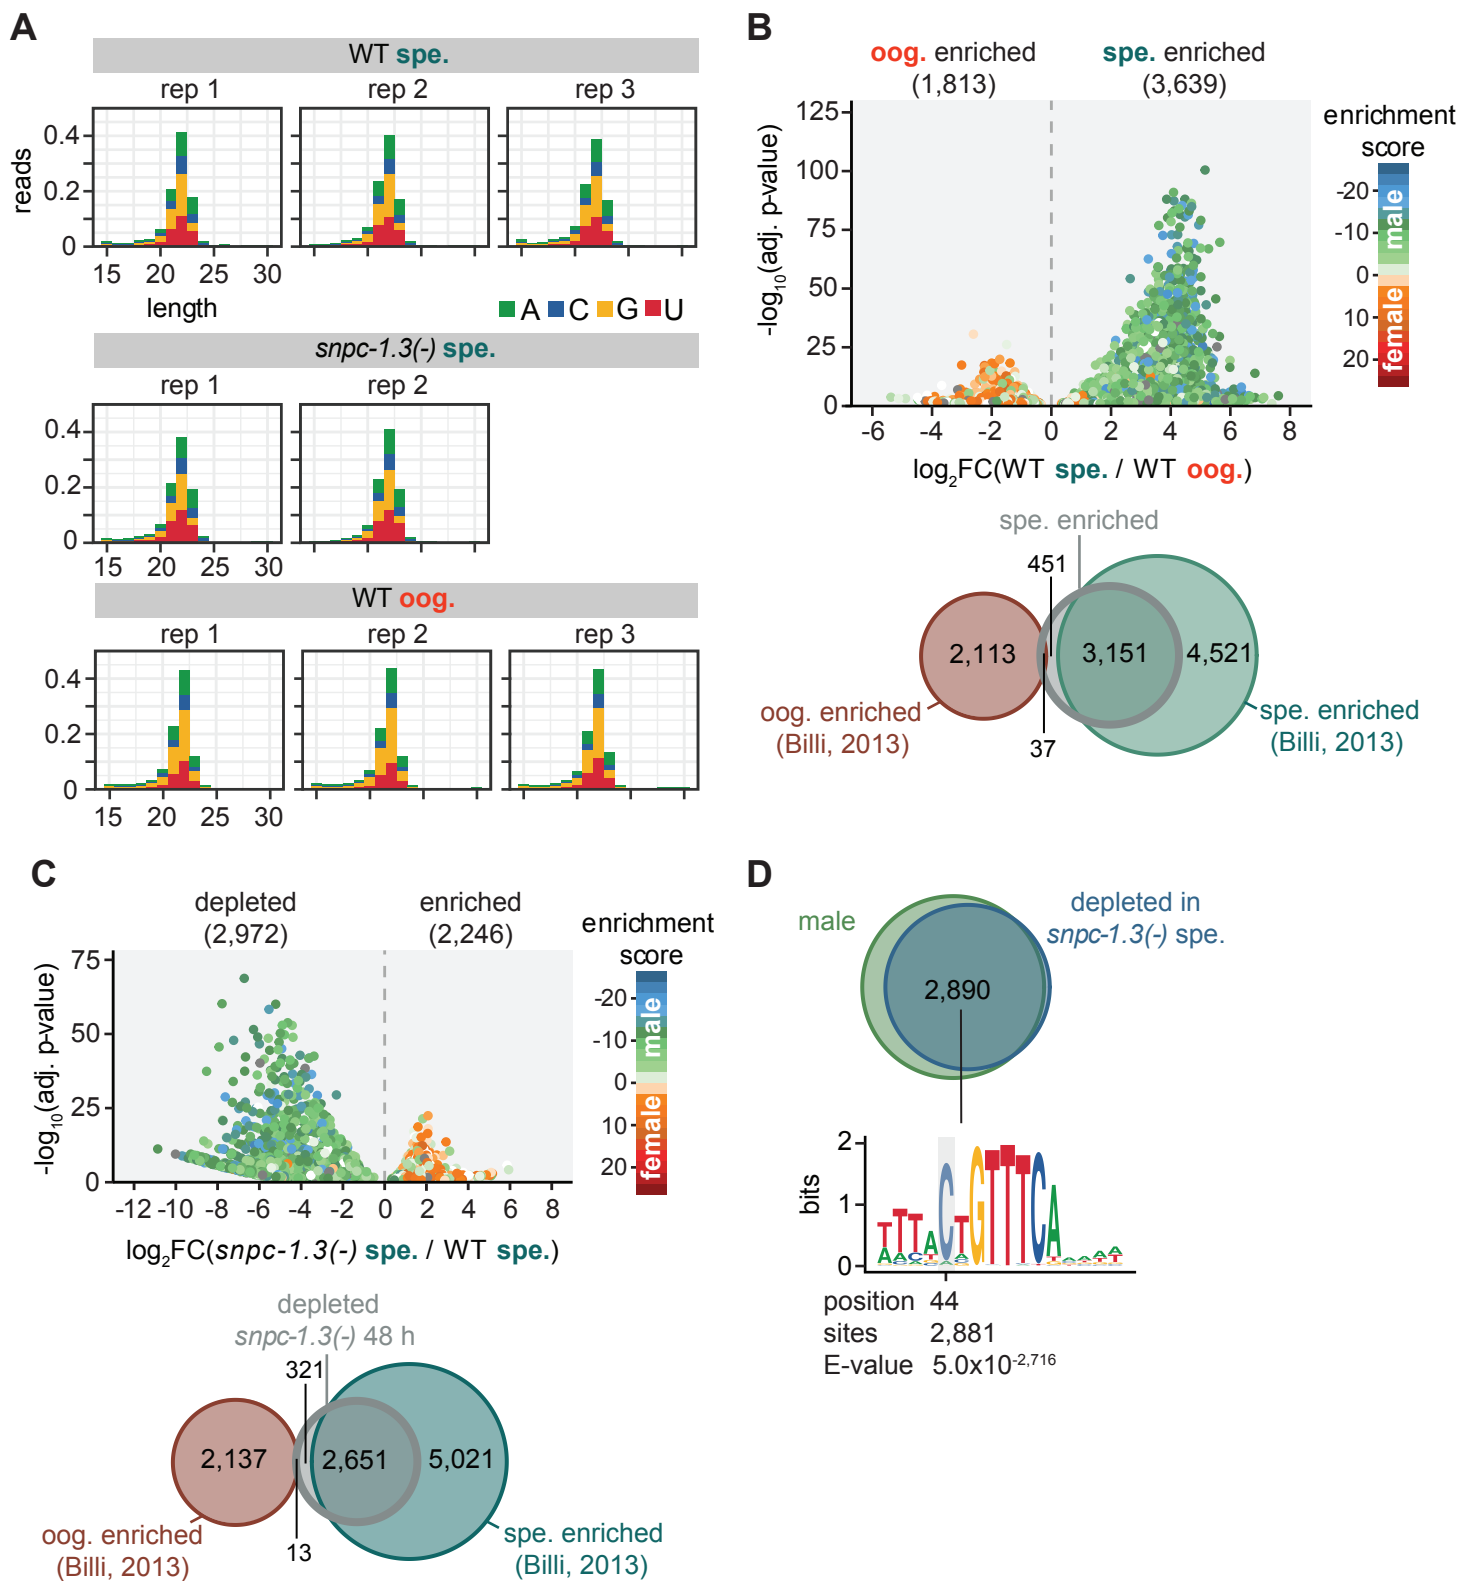



# Supplement Figure 4

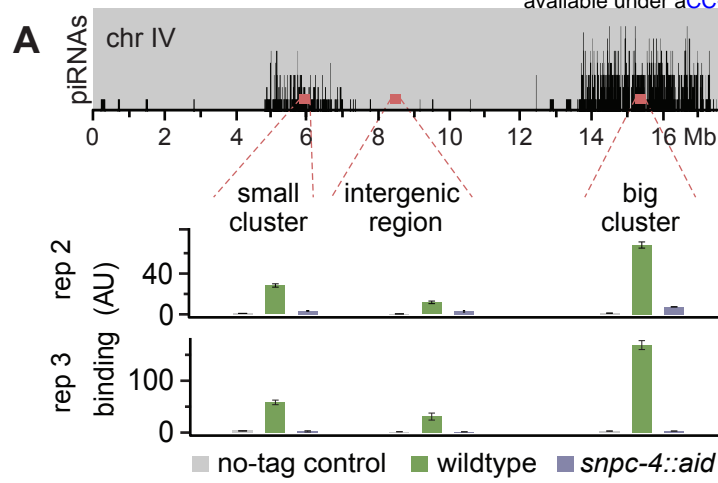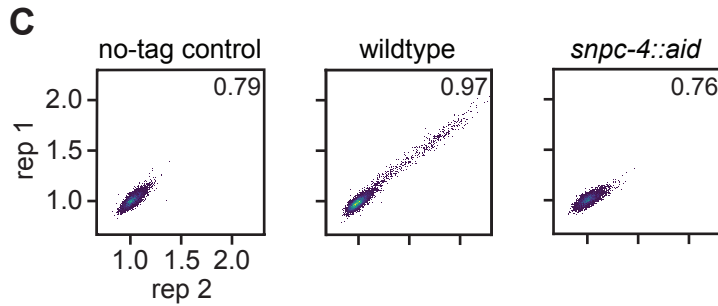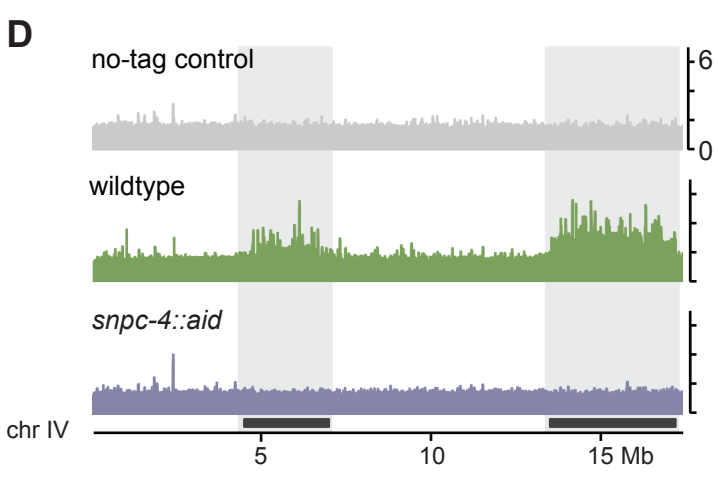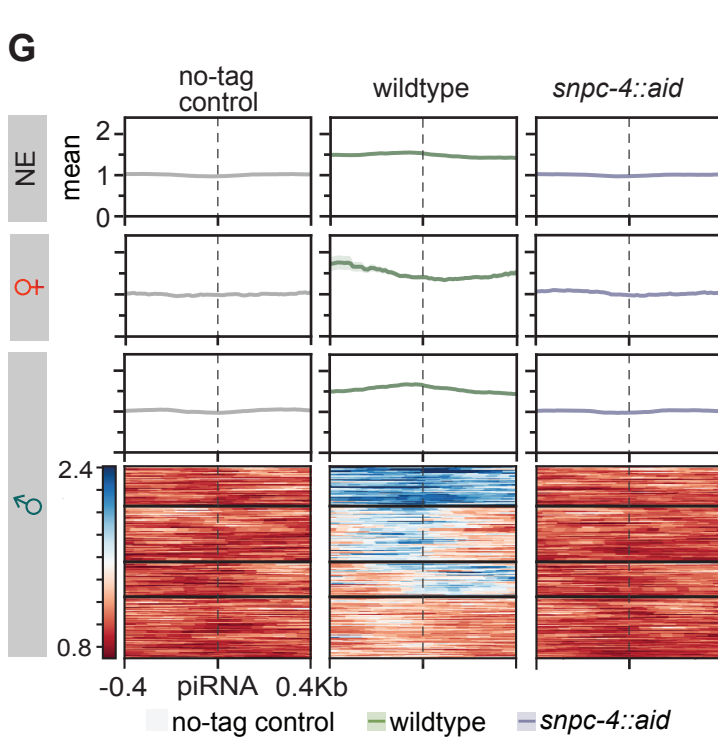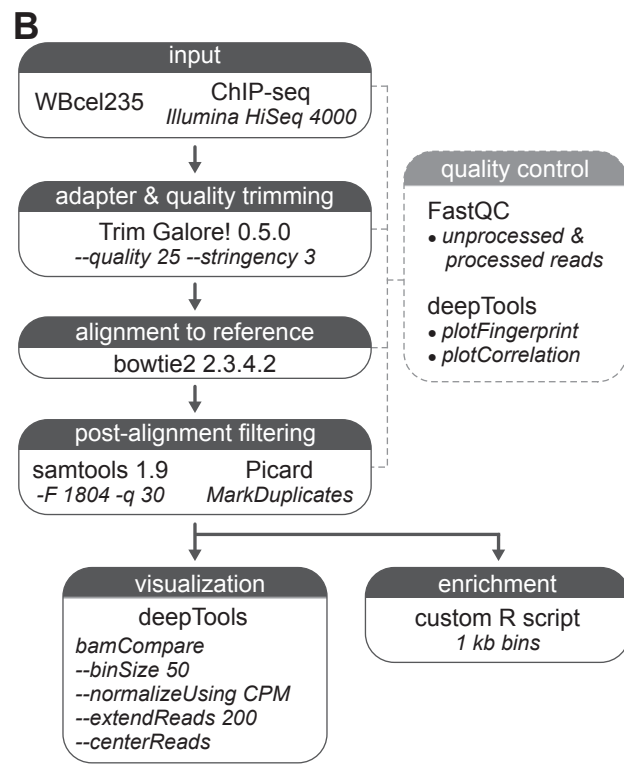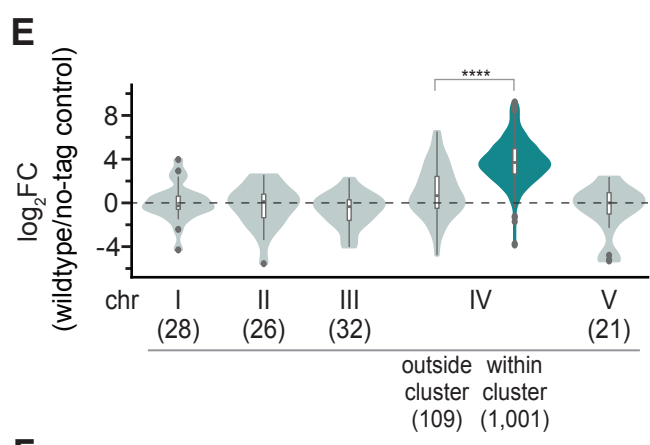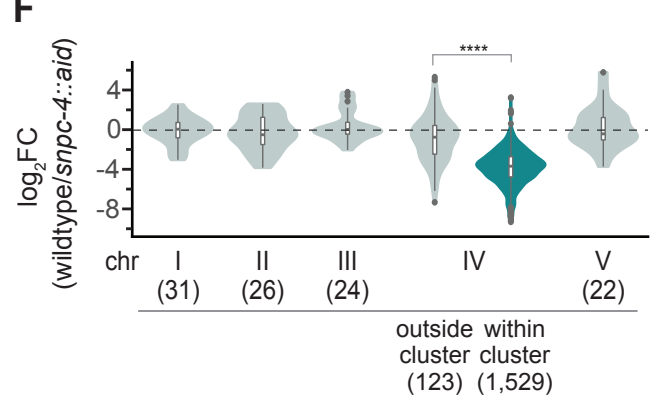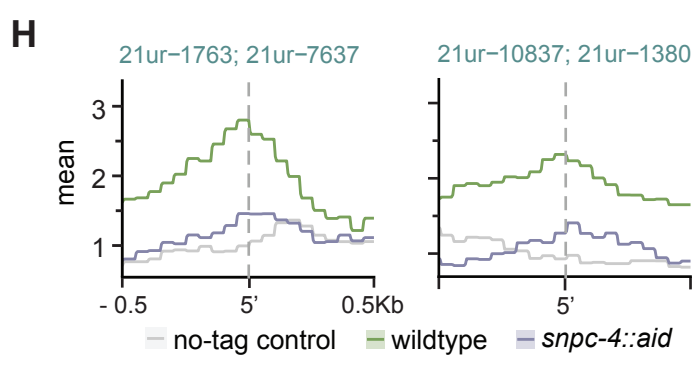

## Supplement Figure 5

**A**

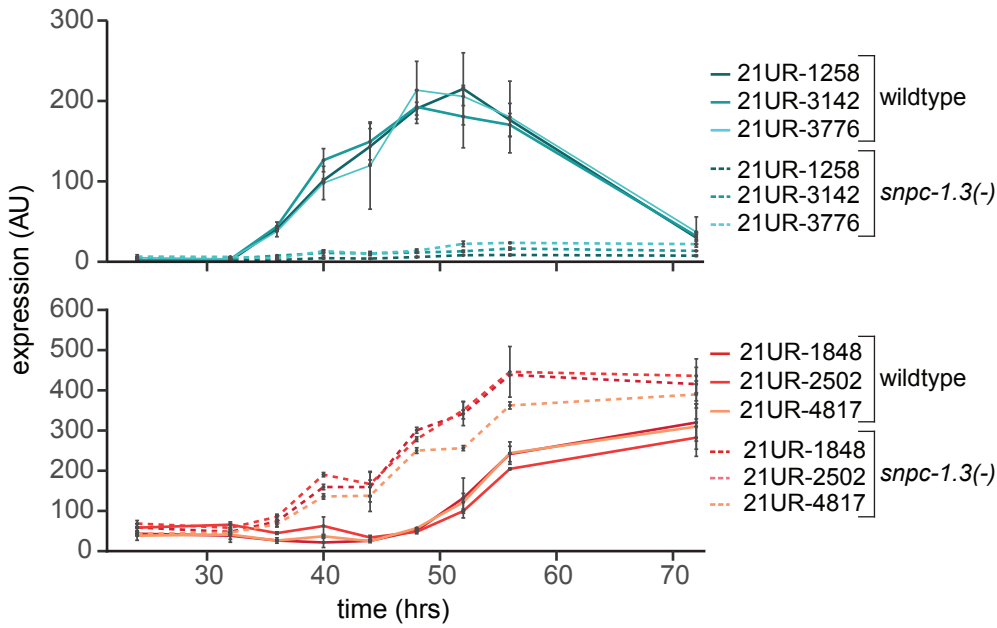

**B**

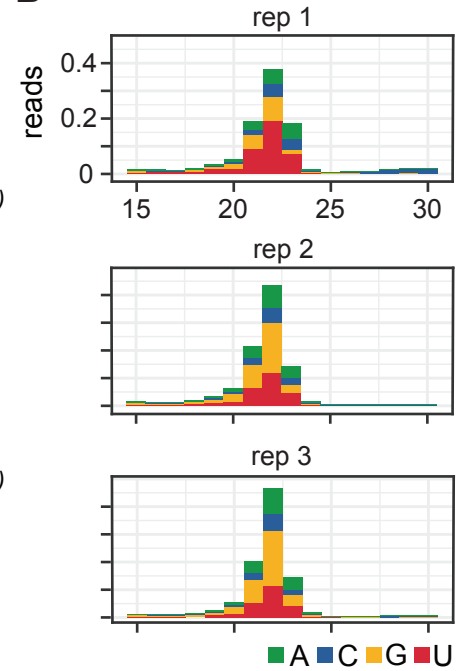

**C**

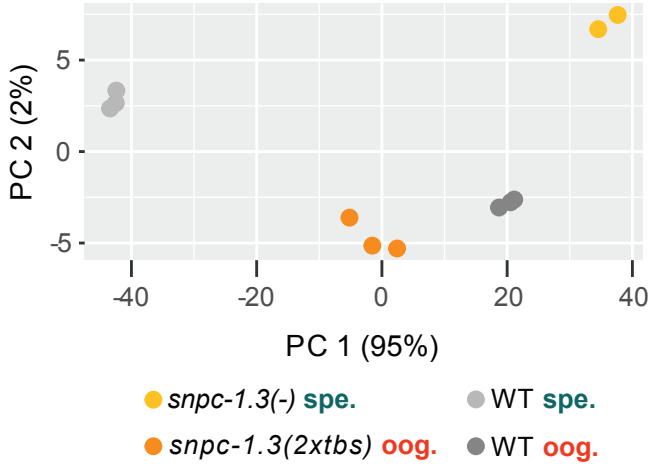

**D**

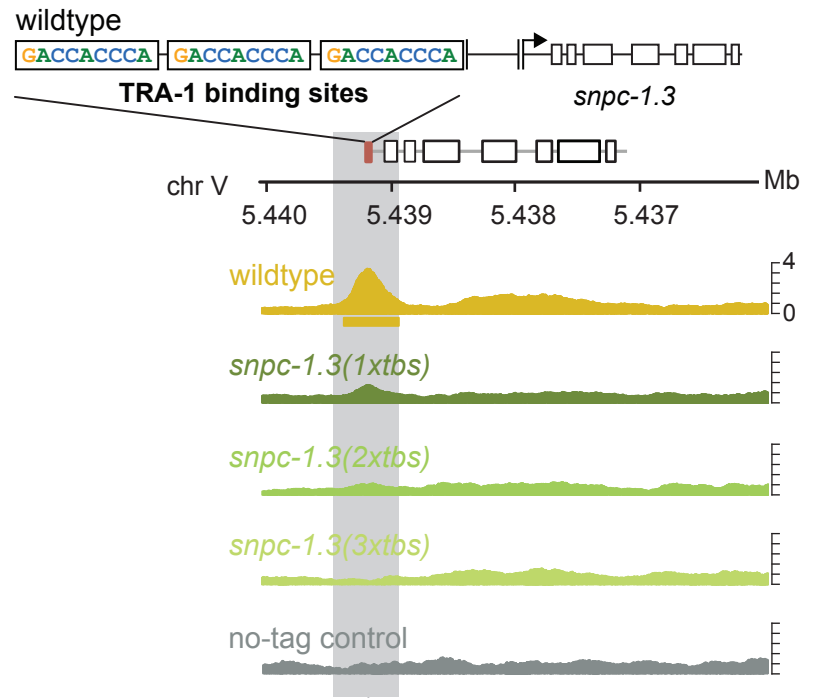

**E**

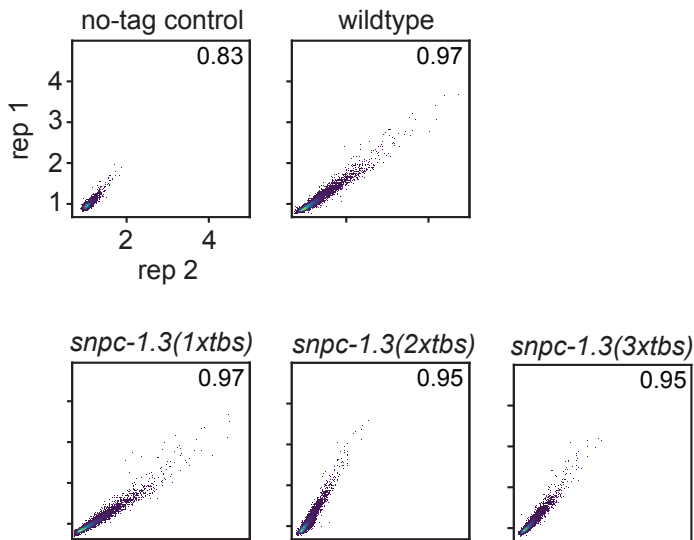

**A**

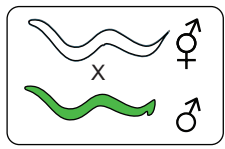

count cross progeny

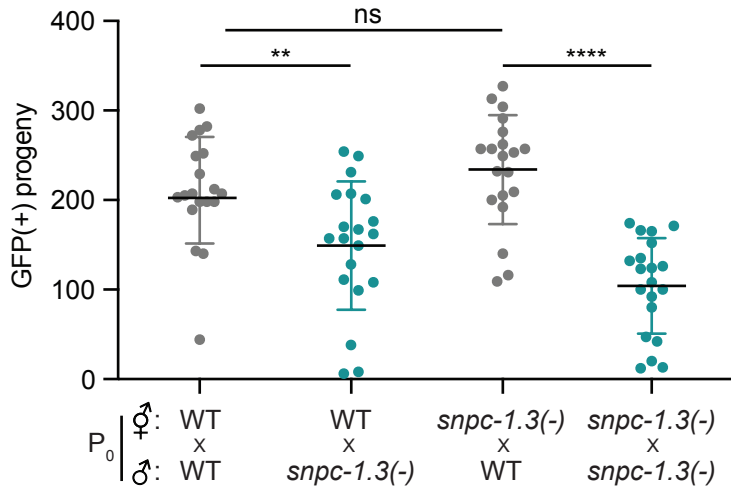

**B**

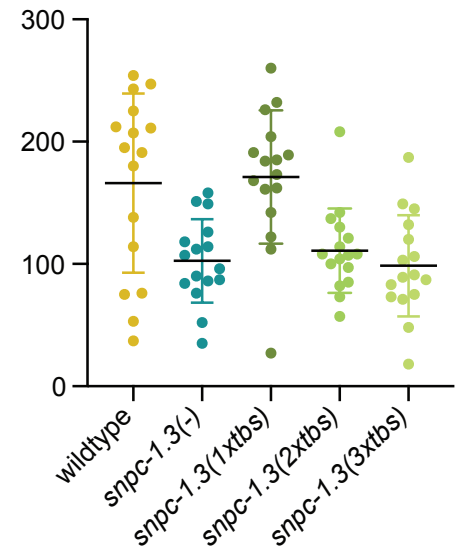

**C**

*C. elegans snpc-1.3*(115-163)  
*C. brenneri snpc-1.3*(130-185)  
*C. nigoni snpc-1.3*(103-158)  
*C. briggsae snpc-1.3*(92-147)

ACCACCCAG----TGTGGCAGAA**GACCACCC**AGTGC GGAAA---AGACCACCCAG  
 GCCAACCAATAGGTATCACCACG**GACCACCC**ACGAAGAAAAAGGAGACCACCCAG  
 TACACCGCGTTTCACAGCGAGCG**GACCTCCC**AGTAAGAAAACTGC**GACCACCC**TG  
 TACCCACACTTCGCAACGAGCG**GACCTCCC**AGTACGAAAACTGC**GACCACCC**TG

TRA-1 binding motif: ACC(A/T)CCCA
